# Supplementary material for: ChinAllomeTree 1.0: China's normalized tree biomass equation dataset
Source: Copernicus journal article supplement (doi:10.5194/essd-2019-1), 2019-01-08
Supplement: Supplementary file [file essd-2019-1-AC1-supplement.pdf]

## **Response to Anonymous Referee #1 on “ChinAllomeTree 1.0: China’s normalized tree biomass equation dataset” by Y. Luo et al.**

Thanks a lot for the reviewer’s thoughtful and constructive comments on our manuscript and dataset. According to the reviewer’s comments, we have revised our manuscript and dataset, and also rechecked the grammar, spelling, punctuation and clarity carefully in the revised version. All changes made to the original manuscript are marked with RED in the revised manuscript, and are listed in the response to the reviewer’s comments. Here we attached our responses and revised manuscript. Furthermore, I have contacted PANGAEA assignee (Stefanie Schumacher) of our dataset (<https://doi.pangaea.de/10.1594/PANGAEA.895244>), and then the revised dataset will be accessible soon.

### **1. MANUSCRIPT**

**1.1 The authors state, that allometric equations for China are missing (e.g. page 3, line1-2). However, the cited reference (Henry et al. 2015) uses data from 2014. In a quick internet search, I found the <http://www.globalloometree.org> database containing more than 1000 allometric equations for China. Also the name of the new dataset (ChinAllomeTree) is quite near to that of the global database (GlobAllomeTree). Please explain in the manuscript and work out the differences. Will this new collection be introduced into GlobAllomeTree?**

>> The state that allometric equation for China are missing has been deleted, and the GlobAllomeTree (<http://www.globalloometree.org>) database and China’s equations within the database have been briefed in Introduction (P2, L18-19; P3, L9-11). In the database GlobAllomeTree, only 1173 tree biomass equations were listed from China, and very limited in scope such as data sources (24 scientific articles), spatial coverage (39 sites) and tree species (*ca.* 50 species) (accessed on April 10, 2019). Importance of our article has been highlighted in the revised version (P3, L11-14). Our dataset showed in this manuscript is more complete, containing 5924 equations of near 200 tree species that were derived from 518 references (journals, reports and books). Our article will be reviewed by rigorous peer reviewer and published in ESSD journal, it will benefit more readers and stakeholders worldwide.

>> In order to distinguish our dataset from GlobAllomeTree, the abbreviation (ChinAllomeTree) of our dataset has been deleted in this version, and thus the title of our article has been revised as “A review of biomass equations for China’s tree species”.

**1.2. Page 3, line 3-4. Please provide a citation.**

>> A citation (Zhang, 2007) has been added in this version of our manuscript (P3, L2-3).

Zhang, X.S.: Vegetation Map of China and Its Geographic Patterns, Geological Publishing House, Beijing, China, 91-124pp., 2007 (In Chinese).

**1.3. Page 9, line 3-4. “As it is often the case” – I would just skip that part of the sentence, as it is rather discussion than result.**

>> Revised as suggested. “As it is often the case” has been deleted (P9, L12-13).

**1.4. Table 1. (i) Stand density - Unclear to me, if it refers to the whole number of trees/ha or only those given in “Tree species (group)”. (ii) Biomass component - How can a biomass component (after all it is said to be a string) be given in units of kilogram? I would say it’s a unitless name.**

>> In revised Table 1, (i) “Stand density” has been revised as “tree spacing” with unit of trees/ha; “biomass component” has been revised as “tree component”, and its unit has also revised as unitless.

**1.5. Table 3. (i) It might be sufficient to put it in the Appendix? (ii) Please make two sentences out of the first one in the caption. I further do not understand the second part of the sentence (“. . ., and mixed species in Column ‘Species name’ does two or more tree species that equations are developed for. ”). Please rephrase (iii) I would appreciate to have the authority after each species name.**

>> (i) Table 3 has been put as Appendix D in the revised version. (ii) Column “species name” has been changed as “tree species (group)”. Mixed species in column “Tree species (group)” refer to tree species groups (e.g., deciduous broadleaved trees, a certain diameter-class mixed species, even generalized) that biomass equations are developed for. (iii) The authority for each tree species are added.

**1.6. Figure 1a. (i) The figure does not work when printed in greyscale (dots and height classes). (ii) In the colored version, red dots on green background are a potential problem for color-blind people. (iii) I do not understand how the map and the small ‘overview’ in the lower right belong together. What is the small rectangle in the lower right within that ‘overview’? It might be helpful to provide Longitude and Latitude also for the ‘overview’ and to describe its function in the figure caption.**

>> From the reviewer’s comment, we think that the reviewer referred to Figure 3a rather than Figure 1a in the early version. (i) and (ii): To highlight the spatial distribution of study sites, the base map of elevation has been removed, and study sites have been marked with black dots in this version (Figure 2 in the revised version). (iii) The map is redesigned and geographical coordinates (longitude and latitude) have been added in the revised version.

**1.7 Write rather “Tree-biomass equations” or “Tree-allometric equations” than “The tree biomass equation” or “The tree allometric equation”, as there is not only one equation, but several different ones.**

>> Revised as suggested (P1, L10; P2, L7 and L10).

**1.8 Replace ~ with –, as – is the usual from-to sign, while ~ is rather used for approximations**

>> Revised as suggested.

**1.9 Page 1, line 12 and page 2, line 4. “spatio-temporal scales” or “spatial and temporal scales”**

>> Revised as suggested. “spatial-temporal scales” has been revised to “spatial and temporal scales” in this version of manuscript (P1, L11; P2, L4).

**1.10 Page 7, line 13. Shift “(Fig. 2)” to the end of the sentence.**

>> Revised as suggested. Considering the Question 1.12, Figure 2 has been put as Appendix C in the revised version. Thus, “(Appendix C)” has been shifted to the end of the sentence (P7, L22). The citation of Appendix C has shown at the end of the sentence.

**1.11 Page 9, line 5. ranges**

>> Revised as suggested (P9, L14).

**1.12 Is Figure 2 really necessary? I think it is sufficient, that the values are presented in the text**

>> Figure 2 showed temporal change of compiled studies during the period 1978-2013. We think that this figure can support the text. However, Figure 2 has been put as Appendix C. The rest figures and appendices have been rearranged.

**1.13 Table 2, I. “For former two forms. . .” – change to “For texts and tables. . .”**

>> Revised as suggested (Table 2).

**1.14 Table 3, header: “Number of biomass equations” instead of “The number. . .”**

>> Revised as suggested (Appendix D in the revised version).

**1.15 Table 3, caption: “column” instead of “Column”**

>> Revised as suggested (Appendix D in the revised version).

## **2. DATASET**

**Please provide explanations of the dataset (like abbreviations) on Pangaea or within the Excel-file. The dataset should be understandable without having to read the paper, which is – at least at the moment – not linked on the Pangaea page.**

>> Good suggestion. The sheet “Description” has been added within the Excel file, including the explanations of all variables used in the dataset.

## **2.1 Sheet “General”**

**2.1.1 In Table 1 of the manuscript, it is described how parameters like e.g. Latitude, Altitude or MAT are retrieved (from original studies or other sources). It would be helpful to add the information on data-origin within the “General” sheet as a new column to give the user the ability to rate its quality.**

>> Column “Data origin” has been added within both Table 1 and sheet “Description”, which describes data origins (e.g., original studies, Google earth, author defined or estimated).

**2.1.2 What is the difference between dominant species and tree species? What are MAT, MAP? I know it is described in the manuscript, but it should be clear from the dataset as well.**

>> Sheet “Description” has been added within the Excel file, including the explanations of all variables used in the dataset. Dominant species indicates that the tree species play the most important roles in the investigated forest (or community, stand). Tree species is the tree species whose biomass equations were shown in original studies.

**2.1.3 I am not sure about how equations were pooled or separated and stumbled over this example: ID 268, Li et al. 2013a, has a stand age from 16 to 68 years, while in the original publication, values are given separately per age class. ID 286-289, Li et al. 2010a, give different equations for different age classes. Unfortunately, the original publication is given in Chinese and I thus cannot have a look to see, if I understand the different splitting of age classes in the dataset.**

>> The equations were not pooled or separated and shown the same as the original reports. In Li et al (2013a), the values of biomass for age class were given. These values were estimated based on the allometric equations that was reported in another reference (Li et al. 2014, in English). In the reference (Li et al., 2014), the allometric equations were reported for the whole age range from 16 to 68 yrs but not for each age class. So in record ID 268, the equations were shown with the stand age from 16 to 68 years. In Li et al. (2010a), different equations for different age class were shown because in the original reference equations for each age class were reported. In revised version, we add a standardized categorization of age classes used by Chinese scientists (Appendix A) for readers to best select equations from our dataset.

Li, H., Li, C.Y., Zha, T.S., Liu, J.L., Jia, X., Wang, X.P., Chen, W.J., and He, G.M.: Patterns of biomass allocation in an age-sequence of secondary *Pinus bungeana* forests in China, The Forestry Chronicle, 90(2), 169-176, 2014. <https://doi.org/10.5558/tfc2014-034>

**2.1.4 A further question concerning stand age: ID 268, Li et al. 2013a, has a stand age from 16 to 68 years, the publication gives values for stands of 16, 35, 50 and 68 years. Your dataset states “16~68” as stand age. In other cases, e.g. ID 508, Wang and Shi 1990, stand age is given as “6, 12, 22, 40”. What is the difference? Unfortunately, the original publication of Wang and Shi is in Chinese and I thus cannot have a look to see, if I would understand the difference.**

>> For ID 268, see the explanation for Question 2.1.3. For ID 508, stand age was given as several separate ages but not an age range because the original report was give such ones. We always consistently follow the original report.

**2.1.5 Replace “~” with “to”**

>> Revised as suggested.

**2.1.6 Provide complete citations (Appendix B) within or together with the dataset**

>> Good suggestion. Sheet “Source” has added within the dataset.

**2.1.7 Please avoid formulas within the cells, as these can easily and unwittingly be changed by clicking in the cell (e.g. clicking in the first cell of the column “Equations included” gives’=Equation!B3&”~”&Equation!B14’). This should be changed into plain text.**

>> Column “Equations included” has been deleted in the revised version, largely due to the weak practicability of equation number in sheet “Equation”. Please refer to section 2.2.3.

**2.2 Sheet “Equation”**

**2.2.1 What do the variables and coefficients (W, D, H, a, b, c, d) stand for? What are Methods and applicable ranges? Again, I know it is described in the manuscript, but it should be clear from the dataset as well.**

>> Sheet “Description” has been added within the Excel file, including the explanations of all variables used in the dataset.

**2.2.2 Applicable ranges Height and Diameter: Why are they sometimes “/”, sometimes “na”? What is the difference?**

>> In our early version, differences between “/” and “na” were not explained clearly. They have been normalized in the revised version of manuscript and dataset, and also explained in the newly added sheet “Description”. “NA” refers to not available; “/” does not necessary or applicable.

**2.2.3 It is to some part impractical to search for equations belonging to a specific ID as they are given e.g. as 5911~5918. It would be helpful, to have the general ID as additional column in the Equation-sheet.**

>> An addition column “equation number” was added that would follow original ID. The combination of ID

and equation number will label each equation. The same ID as sheet “General” has been added in sheet “Equation”, meanwhile, column “Tree species (group)” in sheet “General” has been moved into sheet “Equation”.

**2.2.4 Formulas: saving the dataset as .csv or .txt to import it into other programs results in e.g.  $W=a \cdot D^b$ . It might be better to write  $W=a \cdot D^b$ , which is accepted as power- function in a number of programming languages.**

>> Change as you suggested.

**2.2.5 Avoid merging cells as these might be unreadable for other programs.**

>> Revised as suggested. Merged cells have been canceled in this version of dataset.

**2.2.6 Would it be possible to provide the dataset as .txt or .csv file in general?**

>> In order to maintain the integrity of the dataset, the dataset is still given in commonly used Excel file. Because special formats (e.g. merged cells, and superscript) have been removed or canceled in the revised version, this Excel file can be easy to save as .txt or .csv file, depending on the users’ purposes.

# 1 **A review of biomass equations for China's tree species**

2 Yunjian Luo <sup>1, 2, 4</sup>, Xiaoke Wang <sup>2, 3</sup>, Zhiyun Ouyang <sup>2</sup>, Fei Lu <sup>2</sup>, Liguang Feng <sup>1</sup>, Jun Tao <sup>1</sup>

3 <sup>1</sup> College of Horticulture and Plant Protection, Yangzhou University, Yangzhou 225009, China

4 <sup>2</sup> State Key Laboratory of Urban and Regional Ecology, Research Center for Eco-Environmental Sciences, Chinese Academy  
5 of Sciences, Beijing 100085, China

6 <sup>3</sup> University of Chinese Academy of Sciences, Beijing 100049, China

7 <sup>4</sup> Joint International Research Laboratory of Agriculture and Agri-Product Safety, Ministry of Education, Yangzhou 225009,  
8 China

9 *Correspondence to:* Xiaoke Wang (wangxk@rcees.ac.cn) and Yunjian Luo (yjluo@yzu.edu.cn)

10 **Abstract.** **Tree biomass equations**, which are also called **tree biomass allometric equations**, are the most commonly used  
11 method to estimate tree and forest biomass at various **spatial and temporal** scales because of their high accuracy, efficiency  
12 and conciseness. For decades, many tree biomass equations have been reported in diverse types of literature (e.g., journals,  
13 books and reports). These scattered equations are being compiled, and tree biomass equation datasets are currently available  
14 for many geographical regions (e.g., Europe, North America and Sub-Saharan Africa) and countries (e.g., Australia,  
15 Indonesia and Mexico). **However, one important country of the world is highlighted as an area where a large number of**  
16 **biomass equations are still not reviewed and inventoried extensively, China.** Therefore, in this study, we carried out a broad  
17 survey and critical review of the literature (from 1978-2013) on biomass equations conducted in China and developed  
18 China's normalized tree biomass equation dataset. This dataset consists of 5924 biomass component equations for nearly 200  
19 species and their associated background information (e.g., geographical location, climate and stand description), showing  
20 sound geographical, climatic and forest vegetation coverages across China. The dataset is freely available at  
21 <https://doi.pangaea.de/10.1594/PANGAEA.895244> for noncommercial scientific applications, which fills an important  
22 regional gap in global biomass equations and provides key parameters for biomass estimation in forest inventory and carbon  
23 accounting in China.

# 1 Introduction

Forests are the dominant terrestrial ecosystem in the world, occupying 30.6% of the global land area ( $1.3 \times 10^{10}$  hectare) (FAO, 2016). An important challenge that has been faced by ecologists and foresters for decades is how to enhance the accuracy, consistency and efficiency of forest biomass and carbon estimations at various **spatial and temporal scales**, which is essential to understanding forest carbon cycling and implementing forest carbon-offset activities (Bustamante et al., 2014; Chave et al., 2014). However, the current estimates still have considerable uncertainties (Pan et al., 2013) due in large part to the limited geographical coverage of the estimation methods and their related parameters. **Tree biomass equations are commonly used for estimating forest biomass and carbon** because of their high accuracy, efficiency and conciseness (Chave et al., 2014; Paul et al., 2016), but this method still faces a shortage of localized parameters.

**Tree biomass equations**, which are also called **tree biomass allometric equations**, refer to quantitative relationships between tree biomass (or tree components such as stem, branch, leaf and root) and one or more dendrometric variables (e.g., tree diameter and height). From the International Biological Programme (IBP) on, a large number of tree biomass equations have been developed at specific sites for tree species and forest types. These biomass equations that were scattered in various literature (e.g. journals, reports and books) have been evaluated and inventoried for geographical regions such as Europe (Zianis et al., 2005; Forrester et al., 2017), Latin America (Návar, 2009), North America (Ter-Mikaelian & Korzukhin, 1997; Jenkins et al., 2004), Southeast Asia (Yuen et al., 2016) and Sub-Saharan Africa (Henry et al., 2011), and for countries such as Australia (Eamus et al., 2000; Keith et al., 2000), Indonesia (Anitha et al., 2015) and Mexico (Rojas-García et al., 2015). **As a global initiative, the international web platform GlobAllomeTree (<http://www.globalloometree.org/>), launched in 2013, further promotes the compilation of global biomass equations (Henry et al., 2015).** This work is of great significance to goals such as (1) facilitating the identification of the gaps in the coverage of the equations, (2) testing and comparing existing equations with new ones, (3) developing generalized biomass equations (Forrester et al., 2017; Jenkins et al., 2003), (4) validating and calibrating process-based models and remotely sensed biomass estimates (Rojas-García et al., 2015) and integrating these models with remotely sensed data (e.g., tree height and crown breadth) (Jucker et al., 2016), and (5)



1 elucidating and confirming the generality of plant allometric scaling laws (Návar, 2009; Pilli et al., 2006).

2 China covers most of the world's terrestrial biomes and environmental gradients and has a series of forest types ranging  
3 from tropical rainforest to boreal forest (Zhang, 2007). It is said that 'if you study China, you'll know the world' (Fang et al.,  
4 2012). In the late 1970s, studies to measure tree biomass and develop biomass equations were initiated in China (Pan et al.,  
5 1978, Zhang and Feng, 1979). Subsequently, lots of studies have expanded to nearly all climatic zones and forest types in  
6 China (Luo et al., 2014). Some biomass equation datasets have been built for specific regions (e.g., northeastern China, Chen  
7 and Zhu, 1989; Xishuangbanna Forest Region and Hainan Island, Yuen et al., 2016), specific forest types (e.g.,  
8 *Cunninghamia lanceolata* forest, Zhang et al., 2013; *Larix* forest, Wang et al., 2005; *Populus* forest, Liang et al., 2006) and  
9 short time periods (e.g., from 1978 to 1996, Feng et al., 1999). By now, the platform GlobAllomeTree includes 1173 tree  
10 biomass equations from China, but they are very limited in scope such as data sources (24 scientific articles), spatial  
11 coverage (39 sites) and tree species (*ca.* 50 species) (accessed on April 10, 2019). More importantly, these existing datasets  
12 employed different screening criteria for data inclusion. Therefore, trees biomass equations for China are still not reviewed  
13 and inventoried extensively. In addition, China's biomass equations are hard to benefit more stakeholders worldwide because  
14 of restricted data accessibility in writing language (Chinese) and hard copies (Cheng et al., 2014).

15 Here, after our *Ecology* data paper on forest biomass and its allocation (Luo et al., 2014; related dataset is freely  
16 accessible at <http://www.esapubs.org/archive/ecol/E095/177/>), we continued to review biomass equations for China's tree  
17 species from a broad literature survey and then developed a normalized tree biomass equation dataset. The dataset can  
18 provide a major expansion in comparison to the biomass equation datasets currently available for China, and also fill an  
19 important regional gap in global biomass equations.

## 20 **2 Materials and methods**

### 21 **2.1 Literature retrieval**

22 Concerning tree biomass equations in China (excluding Taiwan Province in our study), we made a great effort to collect

the available literature (journals, books and reports) between 1978 and 2013. Using a series of keywords (biomass, allometry, allometric, relationship, equation, model, and function) with logical operators, studies were retrieved from national libraries (National Digital Library of China, and China Forestry Digital Library), online literature databases (Web of Science, China Knowledge Resource Integrated Database, and China Science and Technology Journal Database), and reference lists from our *Ecology* data paper (Luo et al., 2014) and existing compilations of biomass equations (Feng et al., 1999; Wang et al., 2005; Liang et al., 2006; Xiang et al., 2011; Zhang et al., 2013). During the literature survey, no a priori criteria (e.g., tree species, tree age, site condition, measurement method, and statistical technique) were applied.

## 2.2 Data collection

A critical review of the collected literature was conducted to obtain reliable biomass equations using the following criteria:

**(1) Scope:** Equations for inclusion were restricted to those for both forest-grown trees and open-grown trees.

However, equations for mangrove trees and recently disturbed trees (e.g., coppicing, pruning, fire, and insect pests) were not included.

**(2) Measurement method:** A robust measurement method should cover the appropriate survey period (during the growing season, especially for deciduous trees), plot setting and tree biomass (the oven-dried mass) measurements (cf. Feng et al., 1999). Generally, plot areas were not less than 100 m<sup>2</sup> for boreal and temperate forests, 400 m<sup>2</sup> for subtropical forests, and 1000 m<sup>2</sup> for tropical forests. To develop biomass equations, at least three sample trees should be selected to determine the tree biomass and its components (e.g., stem, branch, foliage, and root) by destructive harvesting and weighing. The division of tree components can be summarized as shown in Fig. 1, although the number of tree components varied with the different purposes of the investigations.

- **Aboveground biomass:** The biomass of at least three aboveground tree components (stem, branch, leaf, or their whole subcomponents) should be determined. If any of the three components or their subcomponent biomass was not measured, the aboveground biomass and relevant biomass (e.g., tree crown and total aboveground biomass)

1 were considered to be inadequate.

- 2 ● **Belowground biomass:** The quality of total belowground biomass was evaluated from three aspects. (1) The total  
3 belowground biomass should be the total biomass of the entire root system (i.e., root crown and different root  
4 diameters), which was determined by using either the full excavation method for the entire root system or a hybrid  
5 of the full excavation method for the root system (excluding fine roots) and the soil pit method (or soil coring  
6 method) for fine roots. (2) The excavation area was larger than or equal to the average tree area covered, and the  
7 excavation depth reached the maximum depth where roots were nearly absent, which was more than at least 50 cm  
8 (Mokany et al., 2006). (3) Fine roots are usually classified as <2-5 mm in root diameter (Finér et al., 2011). Fine  
9 roots play significant roles in the water and nutrient uptake of trees but contribute little to the total belowground  
10 biomass (Mokany et al., 2006). However, if the minimum measured root diameter is >5 mm, the total belowground  
11 biomass may be significantly underestimated.

12 (3) **Equation building:** Biomass equations should be developed using robust regression methods (e.g., ordinary least  
13 squares, maximum likelihood and Bayesian techniques), explicit equation forms (e.g., power, exponential and linear  
14 equations) and valid equation evaluations.

- 15 ● **Predictor variables:** The predictor variables for the biomass equations were limited to the tree diameter at a  
16 certain height (e.g., basal diameter and diameter at breast height (1.3 m above soil surface)), tree height, and  
17 various combinations of them. These variables were used mostly because other variables (e.g., stand density, site  
18 index, and soil type) were highly related to local conditions and thus reduced the robustness and generality of the  
19 biomass equations.

- 20 ● **Equation forms:** If two or more equation forms with the same predictor variable(s) were used to build the  
21 equations, the regression results of only one equation form were selected. More specifically, if the differences  
22 (<0.05) in the coefficients of determination ( $R^2$ ) or correlation coefficient ( $R$ ) were small among all equation forms,  
23 the priority order of equation forms for inclusion was power, exponential, and others (e.g., polynomial and

hyperbolic); if not, the equation form with the highest  $R^2$  (or  $R$ ) was selected. Moreover, for studies that had original data rather than equations, equations were fitted using these original data and two typical allometric models:  $W=a \cdot D_x^b$  and  $W=a \cdot (D_x^2H)^b$ , where  $W$  is the biomass (kg),  $D_x$  and  $H$  are tree diameter at  $x$  height (cm) and tree height (m), and  $a$  and  $b$  are equation coefficients.

- **Equation evaluation:** The goodness-of-fit of regression equations should be evaluated, where the statistical measures  $R^2$  and  $R$  are commonly used in studies in China. Other goodness-of-fit measures except  $R^2$  and  $R$  were not included in our dataset, largely because diverse forms of the error estimates were employed across studies. In addition, several correction factors are proposed to correct the systematic bias in the biomass estimates by using log-linearized equations (Clifford et al., 2013); thus, they were collected for log-linearized equations if available.

**(4) Quality checking:** Robust measurement methods and reliable equation building methods should be adopted in the original studies. Biomass equations for inclusion were checked and were even corrected using original biomass data if available. With increasing tree sizes (diameter and height), the biomass equations did not show unreasonable ranges of tree biomass or biomass allocations. Tree biomass and its allocations were regarded as acceptable if they fell within the biomass and allocation ranges of the averaged trees by forest type and age class (Luo et al., 2013). When the biomass or biomass allocation of the trees that were generated by an equation was outside the abovementioned empirical ranges, the equation was considered questionable and then rechecked to evaluate its inclusion in our dataset.

Biomass equations that met the above criteria were compiled to develop China's dataset of tree biomass equations, mainly consisting of an equation sheet and a general sheet. The former sheet includes tree species (group) whose biomass equations are developed, tree component, predictor variable, equation form, equation coefficients, goodness-of-fit statistics (e.g., correlation coefficient and coefficient of determination) and applicable ranges (i.e., determination methods, and the value ranges of predictor variables). The latter sheet stores the background information for the equations, including the geographical location (e.g., latitude, longitude and altitude), climate (mean annual temperature (MAT) and mean annual precipitation (MAP)) and stand description (e.g., forest type, dominant species, stand origin, stand age and tree spacing). The

1 detailed variables and their descriptions in the dataset are summarized in Table 1.

## 2 **2.3 Estimation of missing data**

3 Not all original studies reported the geographical location, climate data (MAT and MAP), or applicable ranges of  
4 biomass equations. These missing data were estimated as follows:

5 **(1) Geographical location:** Google Earth was used to estimate the geographical centers of the study sites in the original  
6 studies without geographical location descriptions in the form of latitude, longitude and altitude.

7 **(2) Climate data:** The 30 arc-second (*ca.* 1 km at the Equator) resolution global climate database, WorldClim version  
8 1.4 (<http://worldclim.org/current>), was generated through the interpolation of average monthly climatic records from the  
9 1950-2000 period (Hijmans et al., 2005). This database was proved to have high accuracy in estimating climate data (MAT  
10 and MAP) of China (Luo et al., 2014). Therefore, MAT and MAP data were extracted using geographic coordinates from  
11 WorldClim version 1.4 in this study.

12 **(3) Applicable ranges of biomass equations:** Empirical biomass equations were built based on sample trees with  
13 limited ranges of tree size (diameter and height). When these equations are applied beyond the ranges for which they were  
14 developed, the reliability of the biomass estimates is often questionable (Henry et al., 2011). The size ranges of the sample  
15 trees were not always given in the original studies, and it was not possible to access the raw data used for equation building.  
16 According to the amount and reliability of the information in the original studies, five methods (Table 2) were used to obtain  
17 the applicable ranges for the biomass equations. However, some applicable ranges were finely calibrated under the rule ‘tree  
18 biomass increases with increasing tree size’.

## 19 **3 Results**

20 From 518 references during the period 1978-2013, 759 studies and 5924 biomass equations from these studies were  
21 compiled in China’s tree biomass equation dataset. Temporal changes in the number of studies showed a continuously  
22 increasing trend from 1978 to 1990, while a decreasing trend was found during the period 1991-2002 (Appendix C). Since

2002, there has been a generally increasing trend. Studies from 1978 to 1990, 1991 to 2002 and 2003 to 2013 contributed 27.4%, 34.0% and 38.6% of the total studies, respectively. These studies were carried out in 359 sites, showing sound geographical coverage (18.6-52.4 °in latitude, 76.8-130.7 °in longitude and 2-4588 m in altitude) across China (Fig. 2a) and broad climatic gradients (-5.6-24.6 °C in MAT and 39-2500 mm in MAP), representing all biomes from desert to tropical rainforest (Fig. 2b).

These compiled studies and equations varied greatly with forest type, stand origin and tree species (Fig. 3; Appendix D). The studied forests were categorized into five types: deciduous coniferous forest, evergreen coniferous forest, deciduous broadleaved forest, evergreen broadleaved forest, and coniferous and broadleaved mixed forest. Among the five forest types, evergreen coniferous forest had the most studies and equations (45.7% and 38.7% of the total studies and equations), followed by deciduous broadleaved forest (22.9% and 24.1%), evergreen broadleaved forest (17.5% and 21.0%), deciduous coniferous forest (10.4% and 9.5%), and coniferous-broadleaved mixed forest (3.4% and 6.7%) (Fig. 3a). For stand origins, 77.1% and 68.7% of the total studies and equations focused on planted forests (Fig. 3b). Apart from mixed species, there were 5488 equations specific to 197 species (Appendix D). However, only 63 species were in more than two studies, occupying 80.5% of the total species-specific equations. The five most commonly studied species were *Cunninghamia lanceolata* (n=130), *Pinus massoniana* (n=60), *Pinus tabulaeformis* (n=46), *Pinus koraiensis* (n=32) and *Larix principis-rupprechtii* (n=30), which had 706, 365, 395, 218 and 235 equations, respectively.

Compared with the aboveground sector, the belowground sector was not always measured. Many studies (n=177) did not (properly) address the belowground sector, accounting for 23.3% of the total studies. Equations for stem biomass and its subcomponents contributed 27.1% to the total 5924 equations, while branch biomass and its subcomponents contributed 20.1%, leaf biomass and its subcomponents contributed 19.3%, aboveground biomass contributed 6.1%, belowground biomass and its subcomponents contributed 18.3%, and total tree biomass 7.8% (Appendix D). However, only 1.2% of the equations were for other biomass components, such as flower and fruit biomass and tree crown biomass.

Of the 5924 equations, 43.5% were based on a single predictor (diameter or height), and 56.5% were based on two

predictors (diameter and height) or their combinations (Fig. 4a). The diameter at breast height was the most frequently used predictor in the biomass equations (96.8%), whereas tree diameter at other heights rather than breast height was used in 185 equations (3.1%). Moreover, only 9 equations (0.2%) employed tree height as a single predictor. In total, 29 equation forms were applied to develop the quantitative relationships of tree biomass with tree diameter and/or height, which were categorized into five types: power equation, log-linear equation, linear/polynomial equation, exponential equation and hyperbolic equation (Appendix E). The power equation was the most frequently used type (3948 equations, accounting for 66.6% of equations), followed by the log-linear equation (1438, 24.3%), linear/polynomial equation (432, 7.3%), exponential equation (85, 1.4%) and hyperbolic equation (21, 0.4%) (Fig. 4b).

A considerable proportion (20.1%) of the total 5924 equations did not specify the sample size (i.e., the number of trees harvested to develop the equations) (Fig. 5a). The sample size varied from 3 and 420 trees, where the most common sample sizes were between 6 and 25 trees, accounting for 74.5% of the 4,734 equations with specific sample sizes. For the applicable ranges of equations, 2790 out of the 5924 equations had clear applicable ranges in the original studies. There was a great bias towards the smaller diameter classes (Fig. 5b) and height classes (Fig. 5c). From the 5856 equations with available diameter ranges, the maximums and ranges (max-min) of tree diameter varied between 1.6 cm and 150.0 cm and between 1.0 cm and 130.0 cm, where 74.4% and 86.2% of the equations had maximums and ranges less than 30 cm, respectively. From the 3336 equations with available height ranges, the maximums and ranges of the height ranged from 1.2 m to 66.8 m and 0.6 m to 51.5 m, and most of them (73.7% and 94.1%) were less than 20 m.

#### 4 Data availability

This version of China's tree biomass equation dataset was developed from studies that were published from 1978-2013. Data collection is ongoing, and the dataset will be updated as additional data are collected and verified. The dataset is freely available at <https://doi.pangaea.de/10.1594/PANGAEA.895244> for noncommercial scientific applications, but the free availability of the dataset does not constitute permission to reproduce or publish it.

## 1    **5 Conclusion and outlook**

2        In this study, we developed a normalized tree biomass equation dataset based on an extensive literature survey, which  
3 covered broad geographical, climatic and forest vegetation gradients across China. Our dataset provides a major expansion in  
4 comparison to the biomass equation datasets currently available for China (Chen and Zhu, 1989; Feng et al., 1999; Liang et  
5 al., 2006; Wang et al., 2005; Yuen et al., 2016; Zhang et al., 2013) and thus fills an important regional gap relevant to global  
6 datasets (Henry et al., 2015). Our dataset also lays a solid data foundation for the estimation of forest biomass and carbon as  
7 well as general laws for plant allometric scaling. Moreover, this work highlights five limitations and identifies the potential  
8 for future biomass equation research in China, as follows:

9        (1) There are still important gaps, and new equations, particularly for natural forests and most noncommercial tree  
10 species, are needed.

11        (2) To some extent, transparent and consistent protocols for tree biomass measurements, especially for the  
12 belowground sector, were lacking among studies. Moreover, belowground biomass was not measured or was measured  
13 inadequately in many studies.

14        (3) Component-wise biomass equations were always fitted without paying much attention to the additivity of biomass  
15 component equations in practice. To date, various model specification and parameter estimation methods have been  
16 proposed to ensure additivity, for example, seemingly unrelated regression (Dong et al., 2015).

17        (4) The complete reports on biomass equations should cover the regression method, sample size, equation evaluation  
18 (e.g.,  $R^2$ , error estimates of equations, standard errors of equation coefficients, and correction factors for log-linearized  
19 equations) and applicable ranges. However, these reports are often incomplete in current studies, largely due to the lack of  
20 uniform report standards.

21        (5) Limited sample trees with relatively narrow ranges of tree diameter and height were selected from small biotic  
22 (e.g., stand age and tree species) and abiotic (e.g., climate and soil) gradients. Additionally, large trees were often ignored in  
23 sampling campaigns. These limitations limit the applicability of the biomass equations. To overcome these drawbacks,



1 further research is required to evaluate the quality and performance of these equations and develop generic biomass  
2 equations over broader ranges of abiotic and biotic conditions.

### 3 **Author contribution**

4 XW, ZO and YL originated, conceived and designed the work; YL, XW and FL developed and analyzed the equation  
5 dataset; all authors contributed to the writing of the manuscript.

### 6 **Competing interests**

7 The authors declare that they have no conflict of interest.

### 8 **Acknowledgments**

9 This study was supported by National Natural Science Foundation of China (31500388), National Key R&D Program  
10 of China (2018YFC0507303), Open Foundation of State Key Laboratory of Urban and Regional Ecology of China  
11 (SKLURE 2016-2-3), and China Postdoctoral Science Foundation (2016M601144 and 2017T100112).

### 12 **References**

13 Anitha, K., Verchot, L.V., Joseph, S., Herold, M., Manuri, S., and Avitabile, V.: A review of forest and tree plantation  
14 biomass equations in Indonesia, *Ann. Forest Sci.*, 72, 981-997, 2015.  
15 Baskerville, G.L.: Use of logarithmic regression in the estimation of plant biomass, *Can. J. Forest Res.*, 2: 49-53. 1972.  
16 Bustamante, M., Robledo-Abad, C., Harper, R., Mbow, C., Ravindranat, N.H., Sperling, F., Haberl, H., Pinto, A.D.S., and  
17 Smith, P.: Co-benefits, trade-offs, barriers and policies for greenhouse gas mitigation in the agriculture, forestry and  
18 other land use (AFOLU) sector, *Global Change Biol.*, 20, 3270-3290, 2014.

1 Chave, J., Réjou-Méchain, M., Búrquez, A., Chidumayo, E., Colgan, M.S., Delitti, W.B.C., Duque, A., Eid, T., Fearnside,  
2 P.M., Goodman, R.C., Henry, M., Martínez-Yrizar, A., Mugasha, W.A., Muller-Landau, H.C., Mencuccini, M., Nelson,  
3 B.W., Ngomanda, A., Nogueira, E.M., Ortiz-Malavassi, E., Pédissier, R., Ploton, P., Ryan, C.M., Saldarriaga, J.G., and  
4 Vieilledent, G.: Improved allometric models to estimate the aboveground biomass of tropical trees, *Global Change Biol.*,  
5 20, 3177-3190, 2014.

6 Chen, C.G., and Zhu, J.F.: *Manual on Biomass Equations of Major Tree Species in Northeast China*, China Forestry  
7 Publishing House, Beijing, China, 1989 (in Chinese).

8 **Cheng, Z., Gamarra, J.G.P., and Birigazzi, L.: *Inventory of Allometric Equations for Estimating Tree Biomass: A Database*  
9 *for China. MRV Report 18, UN-REDD Programme, Rome, Italy, 17pp., 2014.***

10 Clifford, D., Cressie, N., England, J.R., Roxburgh, S.H., and Paul, K.I.: Correction factors for unbiased, efficient estimation  
11 and prediction of biomass from log-log allometric models, *Forest Ecol. Manag.*, 310, 375-381, 2013.

12 Dong, L.H., Zhang, L.J., and Li, F.R.: Developing additive systems of biomass equations for none hardwood species in  
13 Northeast China, *Trees*, 29, 1149-1163, 2015.

14 Eamus, D., McGuinness, K., and Burrows, W.: *Review of Allometric Relationships for Estimating Woody Biomass for*  
15 *Queensland, the Northern Territory and Western Australia*, Technical Report No. 5a, National Carbon Accounting  
16 System, Canberra, Australia, 56pp., 2000.

17 Fang, J.Y., Shen, Z.H., Tang, Z.Y., Wang, X.P., Wang, Z.H., Feng, J.M., Liu, Y.N., Qiao, X.J., Wu, X.P., and Zheng, C.Y.:  
18 Forest community survey and the structural characteristics of forests in China, *Ecography*, 35, 1059-1071, 2012.

19 FAO (Food and Agriculture Organization of United Nations): *Global Forest Resources Assessment 2015*. FAO, Rome, 44pp.,  
20 2016.

21 Feng, Z.W., Wang, X.K., and Wu, G.: *Biomass and Productivity of Forest Ecosystems in China*, Science Press, Beijing,  
22 China, 241pp., 1999 (In Chinese).

1 Fin  , L., Ohashi, M., Noguchi, K., and Hirano, Y.: Factors causing variation in fine root biomass in forest ecosystems,  
2 Forest Ecol. Manag., 261, 265-277, 2011.

3 Forrester, D.I., Tachauer, I.H.H., Annighoefer, P., Barbeito, I., Pretzsch, H., Ruiz-Peinado, R., Stark, H., Vacchiano, G.,  
4 Zlatanov, T., Chakraborty, T., Saha, S., and Sileshi, G.W.: Generalized biomass and leaf area allometric equations for  
5 European tree species incorporating stand structure, tree age and climate, Forest Ecol. Manag., 396, 160-175, 2017.

6 Henry, M., Jara, M.C., R   ou-M   chain, M., Piotto, D., Fuentes, J.M.M., Wayson, C., Guier, F.A., Lombis, H.C., L   pez, E.C.,  
7 Lara, R.C., Rojas, K.C., Pasquel, J.D.A., Montoya,  .D., Vega, J.F., Galo, A.J., L   pez, O.R., Marklund, L.G., Cahidez,  
8 J.J.N., Malavassi, E.O., P   rez, J., Zea, C.R., Garc   a, L.R., Pons, R.R., Sanquetta, C., Scott, C., Westfall, J.,  
9 Zapata-Cuartas, M., and Saint-Andr    L.: Recommendations for the use of tree models to estimate national forest  
10 biomass and assess their uncertainty, Ann. Forest Sci., 72, 769-777, 2015.

11 Henry, M., Picard, N., Trotta, C., Manlay R.J., Valentini, R., Bernoux, M., and Saint-Andr    L.: Estimating tree biomass of  
12 sub-Saharan African forests: A review of available allometric equations, Silva Fenn., 45(3B), 477-569, 2011.

13 Hijmans, R.J., Cameron, S.E., Parra, J.L., Jones, P.G., and Jarvis, A.: Very high resolution interpolated climate surfaces for  
14 global land areas, Int. J. Climatol., 25(15), 1965-1978, 2005.

15 Jenkins, J.C., Chojnacky, D.C., Heath, L.S., and Birdsey, R.A.: National-scale biomass estimators for United States tree  
16 species, Forest Sci., 49(1), 12-35, 2003.

17 Jenkins, J.C., Chojnacky, D.C., Heath, L.S., and Birdsey, R.A.: Comprehensive Database of Diameter-based Biomass  
18 Regressions for North American Tree Species, General Technical Report NE-319, Northeastern Research Station,  
19 Forest Service, Department of Agriculture, United States, 45pp., 2004.

20 Jucker, T., Caspersen, J., Chave, J., Antin, C., Barbier, N., Bongers, F., Dalponte, M., van Ewijk, K.Y., Forrester, D.I., Haeni,  
21 M., Higgins, S.I., Holdaway, R.J., Iida, Y., Lorimer, C., Marshall, P.L., Momo, S., Moncrieff, G.R., Ploton, P., Poorter,  
22 L., Rahman, K.A., Schlund, M., Sonk    B., Sterck, F.J., Trugman, A.T., Usoltsev, V.A., Vanderwel, M.C., Waldner, P.,  
23 Wedeux, B.M.M., Wirth, C., W   ll, H., Woods, M., Xiang, W., Zimmermann, N.E., and Coomes, D.A.: Allometric

equations for integrating remote sensing imagery into forest monitoring programmes, *Global Change Biol.*, 23, 177-190, 2017.

Keith, H., Barrett, D., and Keenan, R.: Review of Allometric Relationships for Estimating Woody Biomass for New South Wales, the Australian Capital Territory, Victoria, Tasmania and South Australia, Technical Report No. 5b, National Carbon Accounting System, Canberra, Australia, 111pp., 2000.

Liang, W.J., Hu, H.Q., Liu, F.J., and Zhang, D.M.: Research advance of biomass and carbon storage of poplar in China, *J. Forestry Res.*, 17(1), 75-79, 2006.

Luo, Y.J., Wang, X.K., Zhang, X.Q., and Lu, F.: Biomass and Its Allocation of Forest Ecosystems in China, China Forestry Publishing House, Beijing, China, 332pp., 2013 (In Chinese).

Luo, Y.J., Zhang, X.Q., Wang, X.K., and Lu, F.: Biomass and its allocation of Chinese forest ecosystems. *Ecology*, 95(7), 2026, 2014.

Mokany, K., Raison, R.J., and Prokushkin, A.S.: Critical analysis of root:shoot ratios in terrestrial biomes, *Global Change Biol.*, 12, 84-96, 2006.

N ávar, J.: Biomass component equations for Latin American species and groups of species, *Ann. Forest Sci.*, 66, 208-208, 2009.

Pan, W.C., Li, L.C., Gao, Z.H., Zhang, X.Q., and Tang, D.Y.: The biomass and productivity of Chinese fir plantations, *Hunan Forestry Sci. Technol.*, (5), 1-12, 1978 (in Chinese).

Pan, Y., Birdsey, R.A., Phillips, O.L., and Jackson, R.B.: The structure, distribution, and biomass of the world's forests, *Annu. Rev. Ecol. Evol. Syst.*, 44, 593-622, 2013.

Paul, K.I., Roxburgh, S.H., Chave, J., England, J.R., Zerihun, A., Specht, A., Lewis, T., Bennett, L.T., Baker, T.G., Adams, M.A., Huxtable, D., Montagu, K.D., Falster, D.S., Feller, M., Sochacki, S., Ritson, P., Bastin, G., Bartle, J., Wildy, D., Hobbs, T., Larmour, J., Waterworth, R., Stewart, H.T.L., Jonson, J., Forrester, D.I., Applegate, G., Mendham, D., Bradford, M., O'Grady, A., Green, D., Sudmeyer, R., Rance, S.J., Turner, J., Barton, C., Wenk, E.H., Grove, T., Attiwill,

1 P.M., Pinkard, E., Butler, D., Brooksbank, K., Spencer, B., Snowdon, P., O'Brien, N., Battaglia, M., Cameron, D.M.,  
2 Hamilton, S., McAuthur, G., and Sinclair, J.: Testing the generality of above-ground biomass allometry across plant  
3 functional types at the continent scale, *Global Change Biol.*, 22: 2106-2124, 2016.

4 Pilli, R., Anfodillo, T., and Carrer, M.: Towards a functional and simplified allometry for estimating forest biomass, *Forest*  
5 *Ecol. Manag.*, 237, 583-593, 2006.

6 Rojas-García, F., De Jong, B.H.J., Martínez-Zurimendi P., and Paz-Pellat, F.: Database of 478 allometric equations to  
7 estimate biomass for Mexican trees and forests, *Ann. Forest Sci.*, 72, 835-864, 2015.

8 Snowdon, P.: A ratio estimator for bias correction in logarithmic regressions, *Can. J. Forest Res.*, 21, 720-724, 1991.

9 Ter-Mikaelian, M.T. and Korzukhin, M.D.: Biomass equations for sixty-five North American tree species, *Forest Ecol.*  
10 *Manag.*, 97, 1-24, 1997.

11 Wang, W.J., Zu, Y.G., Wang, H.M., Matsuura, Y., Sasa, K., and Koike, T.: Plant biomass and productivity of *Larix gmelinii*  
12 forest ecosystem in northeast China: Intra- and inter-species comparison, *Eurasian J. Forest Res.*, 8(1), 21-41, 2005.

13 Whittaker, R.H.: *Communities and Ecosystems*, 2nd edition, Macmillan, New York, 385pp., 1975.

14 Xiang, W.H., Liu, S.H., Deng, X.W., Shen, A.H., Lei, X.D., Tian, D.L., Zhao, M.F., and Peng, C.H.: General allometric  
15 equations and biomass allocation of *Pinus massoniana* trees on a regional scale in southern China, *Ecol. Res.*, 26,  
16 697-711, 2011.

17 Yuen, J.Q., Fung, T., and Ziegler, A.D.: Review of allometric equations for major land covers in SE Asia: Uncertainty and  
18 implications for above- and below-ground carbon estimates, *Forest Ecol. Manag.*, 360, 323-340, 2016.

19 Zhang, X.S.: *Vegetation Map of China and Its Geographic Patterns*, Geological Publishing House, Beijing, China, 91-124pp.,  
20 2007 (In Chinese).

21 Zhang, X.Q., Duan, A.G., and Zhang, J.G.: Tree biomass estimation of Chinese fir (*Cunninghamia lanceolata*) based on  
22 Bayesian method, *PLoS ONE*, 8(11), e79868, 2013.

- 1 Zhang, J.W., and Feng, Z.W.: Relationships between planting density and the biomass of Chinese fir plantations in hilly  
2 region of Taoyuan County. *Hunan Forest Sci. Technol.*, (5), 1-6, 1979.
- 3 Zianis, D., Muukkonen, P., Mäkipää R., and Mencuccini, M.: Biomass and stem volume equations for tree species in  
4 Europe, *Silva Fenn.*, 4, 1-63, 2005.

5

6 **References cited in the dataset**

- Ai, X.R., and Shen, Z.K.: Growth and biomass of *Larix kaempferi* plantation, *Journal of Hubei Institute for Nationalities (Natural Sciences)*, 19(2), 20-22, 2001 (in Chinese).
- Ai, X.R., and Zhou, G.L.: The biomass of Chinese fir plantation in the north boundary of middle subtropical zone, *Hubei Forestry Science and Technology*, (2), 17-20, 1996 (in Chinese).
- Ai, X.R., Shen, Z.K., and Yi, Y.M.: Effect of stand density on the biomass of *Pinus massoniana* plantation, *Hubei Forestry Science and Technology*, (3), 16-18, 1998 (in Chinese).
- Ai, X.R., Yao, L., Yi, Y.M., and Shen, Z.K.: Carbon storage of *Cryptomeria fortunei* plantation in Enshi Autonomous Prefecture, *Journal of Hubei Institute for Nationalities (Natural Sciences)*, 19(2), 20-22, 2011 (in Chinese).
- An, H.P., Jin, X.L., and Yang, C.H.: Growth rhythm and biomass dynamics of major vegetation types in Banqiaohe Watershed, *Guizhou Forestry Science and Technology*, 19(4), 20-34, 1991 (in Chinese).
- Bai, Y.Q., and Zhan, H.Z.: The biomass of *Larix gmelinii* plantation, *Forest Investigation Design*, (1), 21-25, 1980 (in Chinese).
- Bao, C.S.: Nutrient cycling in a birch forest, in: *Long-term Located Research on Forest Ecosystems, Volume 1*, Zhou, X.F., Wang, Y.H., Zhao, H.X., eds., *Northeast Forestry University Press*, Harbin, China, 217-227, 1991 (in Chinese).
- Bao, C.S., Bai, Y., Qing, M., Chen, G.W., Zhang, Q.L., and Wang, L.M.: Productivity and carbon storage of *Larix gmelinii* natural forest, *Journal of Inner Mongolia Agricultural University*, 31(2), 77-82, 2010 (in Chinese).

- Bao, X.C., Chen, L.Z., Chen, Q.L., Ren, J.K., Hu, Y.H., and Li, Y.: The biomass of planted oriental oak (*Quercus variabilis*) forest, *Acta Phytoecologica et Geobotanica Sinica*, 8(4), 313-320, 1984 (in Chinese).
- Cao, J.X., Wang, X.P., Tian, Y., Wen, Z.Y., and Zha, T.S.: Pattern of carbon allocation across three different stages of stand development of a Chinese pine (*Pinus tabulaeformis*) forest, *Ecological Research*, 27, 883-892, 2012.
- Chai, B.F., Zhang, J.T., Qiu, Y., and Zheng, F.Y.: Aboveground biomass and productivity of *Larix principis-rupprechtii* artificial forest in the west of Shanxi Province, *Henan Science*, 17(S), 68-71, 1999 (in Chinese).
- Chen, C.G.: Biomass equations of Korean pine plantation, *Forest Investigation Design*, (2), 19-23, 1981 (in Chinese).
- Chen, C.G.: Biomass and productivity of tree layers in *Pinus armandii* forests, Qinling Mountains, *Journal of Northwestern College of Forestry*, (1), 1-18, 1984 (in Chinese).
- Chen, H.J.: Biomass and nutrient distribution in a Chinese-fir plantation chronosequence in Southwest Hunan, China, *Forest Ecology and Management*, 105, 209-216, 1998.
- Chen, Q.C.: Study on the Primary Productivity of an Evergreen Broadleaved Forest Ecosystem, Hangzhou University Press, Hangzhou, China, 1993 (in Chinese).
- Chen, W.R.: Study on the dynamics of aboveground net productivity of *Alniphyllum fortunei* plantation, *Journal of Fujian Forestry Science and Technology*, 27(3), 31-34, 74, 2000 (in Chinese).
- Chen, X.G.: The biomass and allometric equation of a 20-years-old *Cunninghamia lanceolata* plantation, *Protection Forest Science and Technology*, (4), 28-29, 40, 2007 (in Chinese).
- Chen, B.H., and Chen, C.Y.: A preliminary study on the biomass and productivity of *Picea koraiensis* forests in the dunes, *Scientia Silvae Sinicae*, (4), 269-278, 1980 (in Chinese).
- Chen, C.G., and Guo, X.F.: The biomass of broadleaved Korean pine forest, *Forest Investigation Design*, (2), 10-19, 6, 1984 (in Chinese).
- Chen, C.G., and Peng, H.: Standing crops and productivity of the major forest types at Huoditang Forest Region of

- Qinling Mountains, Journal of Northwest Forestry College, 11(S), 92-102, 1996 (in Chinese).
- Chen, C.G., and Zhu, J.F.: Manual on Biomass Equations of Major Tree Species in Northeast China, China Forestry Publishing House, Beijing, China, 1989 (in Chinese).
- Chen, Z.S., and Fang, Q.: Nutrient content and the biomass of *Populus alba* var. *pyramidalis* plantation, Forest Research, 1(5), 535-540, 1988 (in Chinese).
- Chen, B.H., Li, H.Q., and Liu, J.G.: Biomass of *Populus diversifolia* natural forest in middle reach of Tarim River, Xinjiang, Xinjiang Forestry Science and Technology, (3), 8-16, 1984a (in Chinese).
- Chen, C.G., Gong, L.Q., Peng, H., and Liu, X.Z.: Biomass and productivity of *Quercus aliena* var. *acuteserrata* forests in Qinling Mountains, Journal of Northwest Forestry College, 11(S), 103-114, 1996 (in Chinese).
- Chen, C.X., Yu, K.Y., Yang, Z.Q., Liao, X.L., You, H.C., and Chen, F.H.: The compatible stand biomass estimation model of *Pinus massoniana* stands, Journal of Sanming University, 27(4), 379-382, 2010 (in Chinese).
- Chen, D.X., Li, Y.D., Luo, T.S., Lin, M.X., and Sun, Y.X.: Biomass and net primary productivity of *Podocarpus imbricatus* plantation in Jianfengling, Hainan Island, Forest Research, 17(5), 598-604, 2004 (in Chinese).
- Chen, H., Ren, C.H., Zheng, L.P., Ruan, C.C., and Liao, Z.H.: Biomass equations of *Phoebe bournei* plantation, Journal of Fujian College of Forestry, 9(4), 411-417, 1989 (in Chinese).
- Chen, L.N., Xiao, Y., Gai, Q., and Ji, W.X.: Preliminary study on the biomass of *Larix principis-rupprechtii* forest in Pangquangou Nature Reserve: Community structure, biomass, and net primary productivity, Journal of Shanxi Agricultural University, 11(3), 240-247, 1991 (in Chinese).
- Chen, L.Z., Ren, J.K., Bao, X.C., Chen, Q.L., Hu, Y.H., Miao, Y.G., and Li, Y.: Community characteristics and biomass of Chinese pine plantation in Xishan Region, Beijing, Acta Phytocologica et Geobotanica Sinica, 8(3), 173-181, 1984b (in Chinese).
- Chen, L.Z., Chen, Q.L., Bao, X.C., Ren, J.K., Miao, Y.G., and Hu, Y.H.: Study on Chinese arborvitae (*Platycladus orientalis*) forest and its biomass in Beijing, Acta Phytocologica et Geobotanica Sinica, 10(1), 17-25, 1986a (in



Chinese).

Chen, L.Z., Ren, J.K., Chen, Q.L., Hu, Y.H., Bao, X.C., and Miao, Y.G.: The biomass of *Robinia pseudoacacia* plantation in Xishan Region, Beijing, Acta Botanica Sinica, 28(2), 201-208, 1986b (in Chinese).

Chen, T., Wen, Y.G., Sun, Y.P., and Liang, H.W.: Preliminary study on the biomass and productivity of *Eucalyptus urophylla* × *E. grandis* plantations with successive rotations, Guangxi Forestry Science, 34(1), 8-12, 2005 (in Chinese).

Chen, X.Y., Peng, Y.Y., and Kang, W.X.: Study on biomass and productivity of a subtropical evergreen broadleaved forest dominated by *Engelhardtia roxburghiana* and *Schima superba*, in: Long-term Located Research on Forest Ecosystem, Liu, X.Z., Kang, W.X., Chen, X.Y., Wen, S.Z., eds., China Forestry Publishing House, Beijing, China, 68-72, 1993a (in Chinese).

Chen, Z.H., Zhang, H.D., Wang, B.S., and Zhang, Z.Q.: The biomass and its allocation of an evergreen broadleaved forest in Heishiding, Guangdong, Acta Phytoecologica et Geobotanica Sinica, 17(4), 289-298, 1993b (in Chinese).

Chen, Z.J., Zhang, J.Z., Chen, J., Xia, Y.F., and Huang, S.Q.: Preliminary study on the aboveground biomass of *Pinus massoniana* air-seeding forest, East China Forest Management, 12(4), 51-53, 1998 (in Chinese).

Chen, Z.X., He, Y.J., Bai, F.M., Zhang, J.H., and Li, Z.H.: Effects of stand density on the biomass and productivity of *Pinus massoniana* air-seeding stands, Journal of Central South Forestry University, 21(1), 44-47, 2001 (in Chinese).

Cheng, Y.X., and Li, Z.X.: Preliminary study on the biomass of three *Larix gmelinii* forests, Inner Mongolia Forestry Investigation and Design, (4), 29-39, 1989 (in Chinese).

Cheng, T.R., Ma, Q.Y., Feng, Z.K., and Luo, X.: Study on forest biomass in Xiaolong Mountains, Gansu Province, Journal of Beijing Forestry University, 29(1), 31-36, 2007 (in Chinese).

Cheng, X.Q., Han, H.R., and Kang, F.F.: Biomass, carbon accumulation and their partitioning of a *Pinus tabulaeformis* plantation ecosystem in Shanxi Province, China, Chinese Journal of Ecology, 31(10), 2455-2460, 2012 (in

Chinese).

Cheng, Y., Hong, W., Wu, C.Z., and Qi, X.H.: Aboveground biomass and its productivity of *Schima superba* population, Chinese Journal of Applied and Environmental Biology, 15(3), 318-322, 2009 (in Chinese).

Cui, W., Mu, C.C., Lu, H.C., Bao, X., and Wang, B.: Effects of draining for forestation on carbon storage of wetland ecosystem in Daxing'an Mountains of northeastern China, Journal of Beijing Forestry University, 35(5), 28-36, 2013 (in Chinese).

Dai, H.J., He, H.J., Zhao, X.H., Zhang, C.Y., Wang, J.S., and Yang, S.: Biomass allocation patterns and allometric models of two dominant tree species in broadleaved and Korean pine mixed forest, Chinese Journal of Applied and Environmental Biology, 19(4), 718-722, 2013 (in Chinese).

Dang, C.L., and Wu, Z.L.: Study on the biomass of *Pinus yunnanensis* forest. Acta Botanica Yunnanica, 13(1), 59-64, 1991 (in Chinese).

Dang, C.L., and Wu, Z.L.: Study on the biomass of a monsoon evergreen broadleaved forest dominated by *Castanopsis echidnocarpa*, Journal of Yunnan University (Natural Sciences), 14(2), 95-107, 1992 (in Chinese).

Dang, C.L., and Wu, Z.L.: Study on the biomass of *Castanopsis orthacantha* community, Journal of Yunnan University (Natural Sciences), 16(3), 195-199, 1994 (in Chinese).

Dang, C.L., Yu, H., and Li, Y.: Study on the relationship between ecological factors and overstory biomass in *Pinus yunnanensis* forest, Journal of Yunnan University (Natural Sciences), 14(2), 146-151, 1992 (in Chinese).

Dang, C.L., Wu, Z.L., and Zhang, Z.: Study on the biomass of *Cyclobalanopsis delavayi* community, Journal of Yunnan University (Natural Sciences), 16(3), 205-209, 1994a (in Chinese).

Dang, C.L., Wu, Z.L., Wang, C.Y., He, Z.R., and Gu, Z.F.: Study on the biomass and net primary productivity of *Abies georgei* community, Journal of Yunnan University (Natural Sciences), 16(3), 214-219, 1994b (in Chinese).

Dang, C.L., Wu, Z.L., and Zhang, Q.: Study on the biomass of the ravine tropical rain forest in Xishuangbanna, Acta Botanica Yunnanica, (S8), 123-128, 1997 (in Chinese).

- Deng, S.J., Wang, K.P., and Gao, H.: Biological productivity and nutrient distribution in overmature *Cunninghamia lanceolata* plantation, Chinese Journal of Ecology, 7(1), 13-18, 1988 (in Chinese).
- Deng, S.J., Liao, L.P., Wang, S.L., Gao, H., and Lin, B.: Bioproductivity of *Castanopsis hysrix* - *Cyclobalanopsis glauca* - *Machilus pauhoi* community in Huitong, Hunan, Chinese Journal of Applied Ecology, 11(5), 651-654, 2000 (in Chinese).
- Di, D.S., Liao, H.Z., Zhang, C.N., and Chen, Z.Z.: Study on ecosystem productivity and tree growth of *Ormosia xylocarpa* plantations, Journal of Nanjing Forestry University, 15(3), 60-65, 1991 (in Chinese).
- Ding, Z.F.: Study on Community Characteristics, Biomass and Productivity of Forests in Xiaokeng Watershed, Anhui Province, Thesis for Master's Degree, Anhui Agricultural University, Hefei, China, 62pp., 2005 (in Chinese).
- Ding, B.Y., and Sun, J.H.: Study on biological productivity and nutrient cycling of artificial Korean pine forest ecosystem, Journal of Northeast Forestry University, 17(S), 1-98, 1989 (in Chinese).
- Ding, G.J., Wang, P.C., and Yan, R.F.: Study on the biomass dynamics and modeling of Masson pine pulpwood stands, Scientia Silvae Sinicae, 34(1), 33-41, 1998 (in Chinese).
- Ding, Z.F., Jiang, C.W., Wang, X.J., and Wu, Z.M.: Forest biomass and productivity of main evergreen communities in Xiaokeng Watershed, Anhui Province, Journal of Nanjing Forestry University (Natural Science Edition), 33(2), 129-133, 2009 (in Chinese).
- Dong, L.H., Li, F.R., and Jia, W.W.: Development of tree biomass model for *Pinus koraiensis* plantation, Journal of Beijing Forestry University, 34(6), 16-22, 2012 (in Chinese).
- Dong, L.H., Li, F.R., and Jia, W.W.: Effects of tree competition on the biomass and biomass models of *Pinus koraiensis* plantation, Journal of Beijing Forestry University, 35(6), 15-22, 2013 (in Chinese).
- Du, W.Z.: The individual biomass of *Pinus tabulaeformis* plantation in Xiaolong Mountains, Gansu Province, Gansu Science and Technology, 28(23), 153-154, 70, 2012 (in Chinese).
- Du, G.J., Hong, L.X., and Yao, G.X.: Study on the aboveground biomass of major evergreen broadleaved secondary

- forests, northwestern Zhejiang Province, Journal of Zhejiang Forestry Science and Technology, 7(5), 5-12, 1987 (in Chinese).
- Du, H., Song, T.Q., Zeng, F.P., Wen, Y.G., and Peng, W.X.: Biomass and its allocation in *Pinus massoniana* plantation at different stand ages in eastern Guangxi Province, Acta Botanica Boreali-Occidentalia Sinica, 33(2), 394-400, 2013 (in Chinese).
- Fan, J.J.: Biomass model of *Larix olgensis* plantation in Dongzhelenghe Nature Reserve, Shanxi Forestry Science and Technology, 41(4), 26-28, 2012 (in Chinese).
- Fang, W., and Wang, G.Q.: Biomass and productivity of farmland shelterbelt network, Forest Science and Technology, (6), 11-13, 1989.
- Fan, S.H., Yu, X.T., Chen, Z.T., Liu, P.S., He, Z.Y., Shen, G.F., and Sheng, W.T.: Biomass of Chinese fir plantation under different site conditions and stand ages: (1) Stand biomass accumulation, Forest Research, 9(S), 78-85, 1996 (in Chinese).
- Fan, S.H., Liu, G.L., Zhang, Q., Feng, H.X., Zong, Y.C., and Ren, H.Q.: Biomass and productivity of *Populus xiaohei* plantation on sandy land in north China, Forest Research, 23(1), 71-76, 2010 (in Chinese).
- Fan, Z.F., An, Y.T., and Zhao, X.H.: Biomass and productivity of *Pinus tabuliformis* plantation, Journal of Beijing Forestry University, 19(S2), 93-98, 1997 (in Chinese).
- Fang, J.P., and Xiang, W.H.: Biomass and its distribution of a primeval *Abies georgei* var. *smithii* forest in Sejila Mountain in Tibet Plateau, Scientia Silvae Sinicae, 44(5), 17-23, 2008 (in Chinese).
- Fang, X., and Tian, D.L.: Dynamics of carbon stock and sequestration in Chinese fir plantation, Guihaia, 26(5), 516-522, 2006 (in Chinese).
- Fang, C.L., Zhu, X.W., and Zhang, H.C.: Preliminary study on the biomass and productivity of *Picea crassifolia* natural secondary forests, Journal of Qinghai University, 9(1), 71-77, 1991 (in Chinese).
- Fang, H.B., Tian, D.L., and Kang, W.X.: Biomass dynamics of a thinned Chinese fir plantation ecosystem, Journal of

- Central South Forestry University, 19(1), 16-19, 1999 (in Chinese).
- Fang, S.Z., Cai, S.Z., Chen, J.H., Yang, B., Ding, X.F., and Song, Z.Y.: Biomass production and pulp-making performance of *Metasequoia glyptostroboides* plantation, Journal of Nanjing Forestry University, 19(4), 51-56, 1995 (in Chinese).
- Feng, Z.W.: Study on the biomass of *Cunninghamia lanceolata* plantations, in: Comprehensive Investigation Reports of Taoyuan County, Taoyuan Agricultural Experiment Station of Chinese Academy of Sciences, eds., Hunan Science and Technology Press, Changsha, China, 322-333, 1980 (in Chinese).
- Feng, Y.Z.: Man-made Community, Yunnan Science and Technology Press, Kunming, China, 48-55, 2007 (in Chinese).
- Feng, L., and Yang, Y.G.: The biomass of natural secondary forests of *Pinus tabuliformis*, *Betula platyphylla* and *Populus davidiana* in Inner Mongolia Region, Journal of Inner Mongolia Forestry College, (3), 1-17, 1981 (in Chinese).
- Feng, L., and Yang, Y.G.: Biomass and productivity of three *Larix gmelinii* virgin forests, Scientia Silvae Sinicae, 21(1), 86-92, 1985 (in Chinese).
- Feng, Z.L., Zheng, Z., Zhang, J.H., Cao, M., Sha, L.Q., and Deng, J.W.: Biomass and its distribution of a tropical wet seasonal rainforest in Xishuangbanna, Acta Phytoecologica Sinica, 22(6), 481-488, 1998 (in Chinese).
- Feng, Z.L., Tang, J.W., Zheng, Z., Song, Q.S., Cao, M., Zhang, J.H., and Xie, J.W.: Biomass dynamics of the pioneer *Trema orientalis* community in the early stages of secondary succession of tropical forest in Xishuangbanna, Chinese Journal of Ecology, 18(5), 1-6, 1999 (in Chinese).
- Feng, Z.L., Zheng, Z., Tang, J.W., Song, Q.S., and Zhang, J.H.: Biomass of tropical secondary *Mallotus paniculatus* forest in Xishuangbanna, Chinese Journal of Ecology, 24(3), 238-242, 2005 (in Chinese).
- Feng, Z.W., Chen, C.Y., Zhang, J.W., Wang, K.P., and Zhao, J.L.: Biological productivity of two forest communities in Huitong County of Hunan Province, Acta Phytoecologica et Geobotanica Sinica, 6(4), 257-267, 1982 (in Chinese).

- Feng, Z.W., Zhang, J.W., Chen, C.Y., Wang, K.P., Zhao, J.L., Zeng, S.Y., and Ma, J.X.: Biological productivity and nutrient distribution in artificial *Michelia macclurei* stand, Journal of Northeastern Forestry Institute, 11(2), 13-20, 1983 (in Chinese).
- Feng, Z.W., Chen, C.Y., Zhang, J.W., Zhao, J.L., Wang, K.P., and Zeng, S.Y.: The biological productivity of Chinese fir stands at different zones, Acta Phytoecologica et Geobotanica Sinica, 8(2), 93-100, 1984 (in Chinese).
- Fu, Z.J.: Study on synecological features and biomass of *Larix chinensis* forest in Taibai Mountain, Journal of Hanzhong Teachers College (Natural Sciences), (2), 69-72, 1994 (in Chinese).
- Gao, Z.H.: Preliminary study on the biomass of *Cunninghamia lanceolata* plantations in different management regimes, Journal of Zhejiang Forestry Science and Technology, (2), 25-30, 1986 (in Chinese).
- Gao, Z.H., and Li, G.L.: Preliminary study on the growth and biomass of *Metasequoia glyptostroboides* shelter forest, Forest Science and Technology, (3), 10-12, 1987 (in Chinese).
- Gao, C.J., Tang, G.Y., Sun, Y.Y., Zhang, C.H., Xie, Q.H., and Li, K.: Biomass and allocation of young *Azadirachta indica* and *Acacia auriculiformis* for different restoration patterns in dry-hot valley, Journal of Zhejiang A&F University, 29(4), 482-490, 2012 (in Chinese).
- Gao, H.Y., Zhou, G.Y., Zhou, Z.P., Zhao, H.B., and Qiu, Z.J., Aboveground biomass of 27-year-old *Cunninghamia lanceolata* plantation in Tianjingshan Forest Farm, Guangdong Province, Guangdong Forestry Science and Technology, 29(4), 1-6, 2013 (in Chinese).
- Gao, H.Z., You, L.Q., and Wang, C.: Individual biomass and productivity of *Pinus tabulaeformis* plantation in Yanshan Mountain, Journal of Hebei Forestry Science and Technology, (4), 7-9, 2009 (in Chinese).
- Gao, S.C., Tian, D.L., Yan, W.D., Zhu, F., Fang, X., and Liang, X.C., Pattern characteristics of stand biomass of urban forest in Changsha City, Journal of Central South University of Forestry and Technology, 30(12), 56-65, 2010 (in Chinese).
- Gao, X.R., Zhao, H., Yang, H.Q., Ling, X.M., and Fan, W.: Biomass and carbon storage of *Rhus typhina* in hilly area of

- Taihang Mountain, Journal of Central South University of Forestry and Technology, 32(12), 172-175, 2012b (in Chinese).
- Gao, Y.P., Pan, M.L., Ding, F.J., Zhou, F.J., and Wu, P.: Biomass and net productivity of natural secondary forests of *Betula luminifera* in west Guizhou, Journal of Central South University of Forestry and Technology, 32(4), 55-60, 2012c (in Chinese).
- Gao, Z.H., Jiang, G.H., Xing, A.J., and Yu, M.R.: The biomass of *Metasequoia glyptostroboides* plantation in Zhebei Plain, Acta Phytoecologica et Geobotanica Sinica, 16(1), 64-71, 1992 (in Chinese).
- Gu, Y.K., Chen, B.G., and Feng, Y.H.: An investigation on the aboveground biomass and its productivity of artificial *Cunninghamia lanceolata* stands in Xijiang Region, Guangdong Province, Journal of South China Agricultural University, 8(1), 41-50, 1987 (in Chinese).
- Guan, D.S.: The biomass and productivity of four stands in the forest area of Liuxihe Reservoir, Ecological Science, (2), 45-52, 1986 (in Chinese).
- Guan, D.Y., and Huang, G.Q.: The biomass and its predictive models of *Castanopsis fissa* natural forest, Journal of Fujian Forestry Science and Technology, 27(2), 34-36, 2000.
- Guan, H.S., and Liu, Y.L.: Study on the biomass of poplar plantations in the middle region of “One River and Two Streams” Watershed, Tibet, Forest Science and Technology, (9), 20-22, 32, 1993 (in Chinese).
- Guo, L.Q., and Xiao, Y.: The biomass table of *Larix principis-rupprechtii* natural forest, Forest Resources Management, (5), 36-39, 1989 (in Chinese).
- Guo, X.Y., Cai, T., Duan, X.W., Han, Y.J., Huang, D., and Da, L.J.: Carbon storage and distribution pattern in main economic fruit forest ecosystems in Shanghai, East China, Chinese Journal of Ecology, 32(11), 2881-2885, 2013 (in Chinese).
- Han, M.Z.: The biomass and production of *Larix gmelinii* plantation, Acta Agriculturae Boreali-Sinica, 2(4), 134-138, 1987 (in Chinese).

- Han, M.Z.: The biomass and net primary productivity of a Dahurian larch-birch forest ecosystem, in: Long-term Research on China's Forest Ecosystems, Department of Science and Technology of Ministry of Forestry, eds., Northeast Forestry University Press, Harbin, China, 451-458, 1994 (in Chinese).
- Han, Y.Z., and Liang, S.F.: Study on the tree root system and its biomass of *Larix principis-rupprechtii* plantation, Shanxi Forestry Science and Technology, (3), 36-40, 1997 (in Chinese).
- Han, F.Y., Zhou, Q.Y., Chen, S.X., Chen, W.P., Li, T.H., Wu, Z.H., and Jian, M.: The biomass and energy of two different aged Eucalyptus stands, Forest Research, 23(5), 690-696, 2010 (in Chinese).
- Han, Y.Z., Li, Y.E., Liang, S.F., and Li, H.Y.: Study on the tree biomass of *Larix principis-rupprechtii* plantation, Journal of Shanxi Agricultural University, 17(3), 278-283, 1997 (in Chinese).
- He, R.B.: The biomass model of *Metasequoia glyptostroboides* plantation, Forestry Prospect and Design, (2), 46-49, 1997 (in Chinese).
- He, F., Wang, Y.Q., Tan, X.F., and Wang, C.N.: The biomass and nutrient cycle in *Vernicia fordii* plantations, Non-wood Forest Research, 8(2), 6-20, 1990 (in Chinese).
- He, G.P., Chen, Y.T., Hu, B.T., Feng, J.W., Liu, H.T., and Cai, H.M.: Study on the biomass and soil fertility of pure and mixed stands of *Cunninghamia lanceolata*, *Liriodendron chinense* and *Sassafras tzumu*, Forest Research, 14(5), 540-547, 2001 (in Chinese).
- He, H.Z., Huang, L.H., Duan, X., and He, R.K.: Study on the biomass in main afforestation tree species of the second-ring forest belt of Guiyang City, Guizhou Science, 25(3), 33-39, 2007 (in Chinese).
- He, H.Z., Song, J.X., Liu, Y.Y., Zhang, Y.W., and Huang, L.H.: The biomass and allocation of Chinese fir forest in southeast Guizhou, Guangdong Agricultural Sciences, (21), 58-60, 2013 (in Chinese).
- He, Y.J., Qin, L., Li, Z.Y., Shao, M.X., Liang, X.Y., and Tan, L.: Carbon storage capacity of a *Betula alnoides* stand and a mixed *Betula alnoides* × *Castanopsis hystrix* stand in southern subtropical China: A comparison study, Acta Ecologica Sinica, 32(23), 7586-7594, 2012 (in Chinese).



- He, Z.M., Fan, S.H., Lu, J.M., Yang, X.J., and Weng, X.Q.: Effects of site management treatments on growth of 6-year-old, second rotation Chinese fir plantations, *Scientia Silvae Sinicae*, 42(11), 47-51, 2006 (in Chinese).
- Hong, T., Wu, C.Z., Lin, Y.M., Chen, C., Li, J., and Lin, H.: Biomass characteristics in the arbor layer of *Vernicia montana* plantation, *Journal of Mountain Science*, 30(6), 648-654, 2012 (in Chinese).
- Hong, Y.C., Xu, W.Q., Ye, G.F., and Zhang, L.H.: Model for estimating biomass of *Casuarina equisetifolia* plantation in coastal region of the southeastern China, *Journal of Zhejiang Forestry Science and Technology*, 30(4), 66-69, 2010 (in Chinese).
- Hu, Y.H., and Pang, Q.L.: The biomass and distribution pattern of *Cunninghamia lanceolata* plantation in western Hubei, *Hubei Forestry Science and Technology*, (3), 6-9, 2012 (in Chinese).
- Hu, D.L., Li, Z.H., and Xie, X.D.: The biomass and productivity of *Pinus taiwanensis* plantation, *Journal of Central South Forestry University*, 18(1), 60-64, 1998 (in Chinese).
- Hu, J.R., Huang, R.K., Zeng, H.D., Li, P.Y., and Wang, Z.X.: Individual biomass model of mature *Pinus massoniana* plantation, *Forestry Prospect and Design*, (1), 9-12, 2011 (in Chinese).
- Hu, S.S., Zhang, Y.T., Li, J.M., Lu, J.J., Li, X., Wang, Q.J., and Wang, X.K.: Biomass distribution of *Populus alba* var. *pyramidalis* plantation, *Xinjiang Agricultural Sciences*, 49(6), 1059-1065, 2012 (in Chinese).
- Huang, D.C.: The biomass of *Cryptomeria fortunei* plantation, *Journal of Southwest Forestry College*, (1), 23-28, 1986 (in Chinese).
- Huang, C.B., and Liang, H.W.: Growth rhythm and biomass of young *Pinus massoniana* plantation in the southeast Guangxi, *Journal of Guangxi Academy of Sciences*, 14(1), 22-27, 1998 (in Chinese).
- Huang, Z.Z., and Bi, J.: Study on the biomass of *Robinia pseudoacacia* stands in Taihang Mountains, *Journal of Hebei Forestry Science and Technology*, (2), 48-52, 1992 (in Chinese).
- Huang, C.H., Zhou, G.Y., Zhao, H.B., Zhou, Z.P., and Qiu, Z.J.: Root system biomass of mature *Cunninghamia lanceolata* plantation in Tianjingshan Forest Farm, Guangdong Province, *Journal of Central South University of*

- Forestry and Technology, 33(9), 80-86, 2013 (in Chinese).
- Huang, L.M., Xue, L., Wang, X.E., Xie, T.F., Ren, X.R., and Cao, H.: Growth and biomass allocation of young *Acacia auriculiformis* stands under different densities, Journal of South China Agricultural University, 29(3), 52-55, 2008 (in Chinese).
- Huang, Q., Li, Y.D., Lai, J.Z., and Peng, G.J.: The biomass of tropical mountain rain forest in Limushan Forest Park, Hainan Island, Acta Phytoecologica et Geobotanica Sinica, 15(3), 197-206, 1991 (in Chinese).
- Huang, S.S., Han, H.R., and Ma, Q.Y.: Study on the biomass of broadleaved tree species in Taiyue Forest Region, in: Forum of Forest Ecology, Volume 1, Zhu, Z.H., Luo, J.C., eds., China Agricultural Science and Technology Press, Beijing, China, 96-102, 1999 (in Chinese).
- Huang, T., Zhong, Q.P., and Peng, X.Y.: Study on the biomass and productivity of *Liriodendron chinense* plantation, Jiangxi Forestry Science and Technology, (5), 4-9, 2000 (in Chinese).
- Huang, X.S., Wu, C.Z., Hong, W., Li, Z.K., and Cheng, Z.P.: The relationship between stand density and biomass of two rotation Chinese fir plantations, Journal of Fujian College of Forestry, 31(2), 102-105, 2011 (in Chinese).
- Huang, Y.Q., Chen, S.Y., and Wu, X.F.: Models for estimating biomass of *Eucalyptus urophylla* plantation, Journal of Anhui Agricultural University, 28(1), 44-48, 2001 (in Chinese).
- Hui, G.Y., Tong, S.Z., Liu, J.F., and Luo, Y.W.: Effects of afforestation density on the biomass of young *Cunninghamia lanceolata* plantation, Forest Research, 1(4), 413-417, 1988 (in Chinese).
- Hui, G.Y., Luo, Y.W., and Zhang, X.L.: The productivity of Chinese fir (*Cunninghamia lanceolata*) plantation at hilly area in Dagang Mountain, Jiangxi Province, Scientia Silvae Sinicae, 25(6), 564-569, 1989 (in Chinese).
- Huo, C.F., You, W.Z., Zhang, H.D., Yan, T.W., Wei, W.J., Zhao, G., Guo, J.S., and Xing, Z.K.: Biomass and net primary productivity of *Quercus mongolica* natural secondary forest in Bingla Mountain, Liaoning Province, Journal of Liaoning Forestry Science and Technology, (4), 4-6, 11, 2011 (in Chinese).
- Ji, Y.H., Zhang, J.L., and Kang, L.X.: A study on biomass equations for *Metasequoia glyptostroboides* shelterbelt in the

- coastal agroforestry, *Journal of Jiangsu Forestry Science and Technology*, 24(2), 1-5, 1997 (in Chinese).
- Jia, Y., and Qi, L.X.: The relationship between *Lophodermium maximum* and the biomass of *Pinus koraiensis* plantation, *Journal of Northeast Forestry University*, 16(5), 7-14, 1988 (in Chinese).
- Jia, Y., and Zhang, F.: The biomass of *Pinus koraiensis* plantation in Caohekou Forest Region, Liaoning Province, *Journal of Liaoning Forestry Science and Technology*, (5), 18-23, 1985 (in Chinese).
- Jia, K.X., Zheng, Z., and Zhang, Y.P.: Changes in the aboveground biomass of rubber plantations along an elevation gradient in Xishuangbanna, *Chinese Journal of Ecology*, 25(9), 1028-1032, 2006 (in Chinese).
- Jia, W.W., Jiang, S.W., and Li, F.R.: Individual biomass of *Pinus sylvestris* var. *mongolica* plantation in the eastern Heilongjiang, *Journal of Liaoning Forestry Science and Technology*, (3), 5-10, 2008 (in Chinese).
- Jia, Y.L., Xu, Z.Q., Ji, X.L., Xu, X.H., and Huang, X.R.: Biological carbon storage of a plantation and natural secondary forest in the north region of Yanshan Mountain, *Journal of Natural Resources*, 27(7), 1241-1251, 2012 (in Chinese).
- Jiang, H.: A study on the biomass and productivity of *Picea purpurea* natural forest, *Acta Phytoecologica et Geobotanica Sinica*, 10(2), 146-152, 1986 (in Chinese).
- Jiang, H.: Study on the biomass of *Quercus liaotungensis* and *Betula dahurica* forest in Dongling Mountain, in: *Studies on Structures and Functions of Warm-temperate Forest Ecosystems*, Chen, L.Z., Huang, J.H., eds., Science Press, Beijing, China, 104-115, 1997 (in Chinese).
- Jiang, Z.L., and Zhao, S.: Study on the biomass of Loblolly pine plantation, in: *Proceedings of forest ecosystems on Xiashu Ecological Station*, Jiang, Z.L., eds., China Forestry Publishing House, Beijing, China, 10-15, 1992 (in Chinese).
- Jiang, H., and Zhu, J.J.: Study on the biomass and productivity of *Picea asperata* natural forest, *Journal of Sichuan Forestry Science and Technology*, 7(2), 5-13, 1986 (in Chinese).
- Jiang, B., Yuan, W.G., Zhu, G.Q., Shi, J.T., Zhao, P.F., and Xu, Z.W.: A preliminary study on the biomass and

- productivity of *Pinus massoniana*, *P. elliottii* and *P. taeda* plantations, Journal of Zhejiang Forestry Science and Technology, 12(5), 1-8, 22, 1992 (in Chinese).
- Jiang, J.P., Yang, X., and Li, R.X.: Net productivity and organic matter return of *Paulownia* plantation ecosystem, Acta Agriculturae Universitatis Henanensis, 23(4), 327-337, 1989 (in Chinese).
- Jiang, P., Dong, S.G., Sui, Y.L., Wang, J.Y., and Wang, G.Z.: Study on biomass model of *Larix principis-rupprechtii* stands in Beigou Forest Farm, Journal of Central South University of Forestry and Technology, 33(7), 131-135, 2013 (in Chinese).
- Jiang, T., Zhao, M., Zhang, S.Z., Yuan, M.L., and Huang, X.R.: Individual biomass and its allocation pattern of *Pinus tabulaeformis* in Hebei, Hebei Journal of Forestry and Orchard Research, 27(3), 239-244, 2012 (in Chinese).
- Jiang, Y.X., Xu, D.Y., and Nie, D.P.: Study on the Productivity and Nutrient Cycling of Chinese Fir Plantation, China Forestry Publishing House, Beijing, China, 78-79, 1995 (in Chinese).
- Jiang, Z.H., Fan, S.H., Feng, H.X., Zhang, Q., Liu, G.L., and Zong, Y.C.: Biomass and distribution pattern of *Populus xiaohei* plantation in sandy land of north China, Scientia Silvae Sinicae, 43(11), 15-20, 2007 (in Chinese).
- Jiao, S.R.: A preliminary study of the biomass and nutrient element distribution in *Pinus sylvestris* var. *mongolica* plantations in Zhanggutai Region, Liaoning Province, Acta Phytoecologica et Geobotanica Sinica, 9(4), 257-265, 1985 (in Chinese).
- Jie, J.L., Zhan, Y.S., Huang, W.C., Long, W., Luo, Y.C., Hu, H.Y., and Xie, Z.R.: Study on the biomass of *Pinus elliottii* stand near Jinggangshan Line of Jing-Jiu Railway, Jiangxi Forestry Science and Technology, (2), 17-20, 2002 (in Chinese).
- Jin, A.L.: Study on the biomass of main tree species in Bayingzhuang Forest Farm, Hebei Province, Thesis for Master's Degree, Beijing Forestry University, Beijing, China, 53pp., 2012 (in Chinese).
- Jin, A.L., Rao, L.Y., Li, J., and Zhang, T.: The biomass of *Larix principis-rupprechtii* plantation, Guangdong Agricultural Sciences, (12), 165-168, 2012 (in Chinese).

- Jin, Z.Y., Jia, W.W., and Liu, W.: Biomass model for *Larix olgensis* plantation, Bulletin of Botanical Research, 30(6), 747-752, 2010 (in Chinese).
- Jing, Y., Lu, J.M., and Xiao, H.S.: Effect of treatment regimens on the growth of *Pinus massoniana* regenerated stands, China Forestry Science and Technology, 18(1), 24-26, 2004 (in Chinese).
- Kong, F.B., and Fang, H.: Comparative study on the biomass of *Pinus taeda* plantations with different densities and ages, Forestry Science and Technology, 28(3), 6-9, 2003 (in Chinese).
- Kong, X.R., and Liu, Z.G.: The biomass and productivity of tree layer of *Cunninghamia lanceolata* plantation, Journal of Guangxi Agricultural College, (2), 29-40, 1983 (in Chinese).
- Kang, B., Liu, S.R., Zhang, G.J., Chang, J.G., Wen, Y.G., Ma, J.M., and Hao, W.F.: Carbon accumulation and distribution in *Pinus massoniana* and *Cunninghamia lanceolata* mixed forest ecosystem in Daqingshan, Guangxi of China, Acta Ecologica Sinica, 26(5), 1320-1329, 2006 (in Chinese).
- Li, B.T.: Preliminary study on biomass investigation method of Chinese fir plantation, Forest Resources Management, (6), 57-60, 1988 (in Chinese).
- Li, H.L.: Carbon storage and carbon budget of poplar-crop intercropping ecosystem in the agricultural region of northern Jiangsu Plain, PhD Dissertation, Nanjing Forestry University, Nanjing, China, 125pp., 2010a (in Chinese).
- Li, Z.: Study on the biomass of *Platycladus orientalis* plantation in Xuzhou City, Thesis for Master's Degree, Nanjing Forestry University, Nanjing, China, 36pp., 2010b (in Chinese).
- Li, Z.H.: Effect of thinning on *Cunninghamia lanceolata* plantation in the eastern Hunan Province, Scientia Silvae Sinicae, 36(S1), 131-136, 2000 (in Chinese).
- Li, S.L., and Hou, J.Z.: The biomass of *Populus tomentosa* clonal plantation, Acta Agriculturae Universitatis Henanensis, 29(2), 134-140, 1995 (in Chinese).
- Li, B.B., Jian, W.H., Qin, Y., Zhang, Y.Z., and Wang, Z.B.: Relationship between stand density and the biomass of

- young *Larix principis-rupprechtii* plantation, Hebei Journal of Forestry and Orchard Research, 24(3), 244-247, 2009a (in Chinese).
- Li, C.Y., Zha, T.S., Liu, J.L., and Jia, X.: Carbon and nitrogen distribution across a chronosequence of secondary lacedark pine in China, The Forestry Chronicle, 89(2), 192-198, 2013a.
- Li, D.L., Jiang, P., and Wang, Y.F.: Individual biomass and productivity of *Larix principis-rupprechtii* plantation in Yanshan Mountain, Hebei Journal of Forestry and Orchard Research, 26(4), 334-339, 2011a (in Chinese).
- Li, G., Li, Y.G., Liu, M.Z., and Jiang, G.M.: Vegetation biomass and net primary production of sparse forest grassland in Hunshandake Sandland, Science and Technology Review, 29(25), 30-37, 2011b (in Chinese).
- Li, G.X., Meng, G.T., Fang, X.J., Lang, N.J., Yuan, C.M., and Wen, S.L.: Community characteristics and the biomass of *Alnus cremastogyne* plantation in central Yunnan Plateau, Journal of Zhejiang Forestry College, 23(4), 362-366, 2006a (in Chinese).
- Li, H.L., Chen, L.B., Fang, S.Z., and Sun, Q.X.: Comparison of carbon storage and distribution in different poplar-crop intercropping patterns, Scientia Silvae Sinicae, 45(11), 9-14, 2009b (in Chinese).
- Li, J., Li, H.M., Chen, G.X., and Shi, J.X.: A study on the biomass of young *Rhus chinensis* and *R. punjabensis* plantation, Journal of Jishou University (Natural Science Edition), 21(1), 1-5, 2000 (in Chinese).
- Li, J.H., Li, C.J., and Peng, S.K.: Study on the biomass expansion factor of poplar plantation, Journal of Nanjing Forestry University (Natural Sciences Edition), 31(4), 37-40, 2007a (in Chinese).
- Li, J.L., Liang, S.C., and Cheng, S.Z.: A preliminary study on the community characteristics of *Keteleeria davidiana* var. *chien-peii* forest in Guizhou, Guizhou Science, 11(4), 7-11, 1993 (in Chinese).
- Li, J.L., Liang, S.C., and Cheng, S.Z.: Preliminary study on the biomass of *Keteleeria davidiana* var. *chien-peii* population in Qingyan Town, Guizhou Province, Journal of Guizhou Normal University (Natural Sciences), 15(1), 7-12, 1997 (in Chinese).
- Li, J.Z., Qin, W.M., Qin, Y., Qin, J., Tang, K., and Duan, W.W.: The biomass and productivity of *Manglietia glauca*

- plantation, *Journal of Fujian Forestry Science and Technology*, 38(1), 1-5, 2011c (in Chinese).
- Li, N., Xu, W.B., Lai, J.S., Yang, B., Lin, D.M., and Ma, K.P.: The coarse root biomass of eight common tree species in subtropical evergreen forest, *Chinese Science Bulletin*, 58(4), 329-335, 2013b (in Chinese).
- Li, S.C., Liu, X.L., Liu, X.Q., and Shi, Y.H.: The biomass and hydrological effects of *Pinus massoniana* plantation, *Central South Forest Inventory and Planning*, (3), 26-29, 1995 (in Chinese).
- Li, S.H., Shi, J.N., and Lei, P.: The biomass and its vertical distribution of the second-generation Chinese fir plantation, *Journal of Sichuan Forestry Science and Technology*, 28(1), 64-67, 2007b (in Chinese).
- Li, W.B., Bao, W.K., He, B.H., Wu, W.Y., and Li, F.L.: Biomass distribution and its influencing factors of *Pinus tabulaeformis* plantations in the Dagou Valley of the upper Minjiang River, *Journal of Mountain Science*, 25(2), 236-244, 2007c (in Chinese).
- Li, X.C., Huang, L.B., Gui, G.R., Li, Z.J., Fan, K.S., Lu, H.L., Du, X.X., Ma, W.M., Yang, J.M., and Li, Y.L.: Effects of initially planted density on young Chinese fir plantation for construction timber, *Journal of Jiangsu Forestry Science and Technology*, 23(3), 1-6, 1996a (in Chinese).
- Li, X.G., Xu, J.Y., and Zhai, C.Y.: Study on the biomass of *Gordonia acumenata* community in Jinyun Mountains, in: *Ecological Research on Evergreen Broadleaved Forests*, Zhong, Z.C., eds., Southwest Normal University Press, Chongqing, China, 234-250, 1988 (in Chinese).
- Li, X.R., Liu, Q.J., Chen, Y.R., Hu, L.L., and Yang, F.T.: Aboveground biomass of three coniferous plantations in Qianyanzhou Research Station, *Chinese Journal of Applied Ecology*, 17(8), 1382-1388, 2006b (in Chinese).
- Li, Y., Zhang, J.G., Duan, A.G., and Xiang, C.W.: Selection of biomass estimation models for Chinese fir plantation, *Chinese Journal of Applied Ecology*, 21(12), 3036-3046, 2010a (in Chinese).
- Li, Y.S., Shi, M.H., and Kang, G.L.: The biomass and water-holding capacity of young *Pinus tabulaeformis* plantation, *Shanxi Forestry Science and Technology*, (4), 35-38, 1994 (in Chinese).
- Li, Z., Wang, Z.Y., Wang, Y., Guan, Q.W., Wei, W., Dong, P., and Zhang, H.N.: Effect of thinning on the biomass of

- Platycladus orientalis* plantation, China Forestry Science and Technology, 24(1), 68-71, 2010b (in Chinese).
- Li, Z., Zhou, W., Guan, Q.W., Wei, W., Dong, P., and Zhang, H.N.: Biomass and its influencing factors of *Platycladus orientalis* plantation in the limestone mountains of Xuzhou City, Journal of Anhui Agricultural University, 37(4), 669-674, 2010c (in Chinese).
- Li, Z.H., He, L.X., Zhou, Y.P., and Zhou, Q.K.: The biomass and productivity of *Metasequoia glyphostrobodes* plantation, Journal of Central South Forestry University, 16(2), 47-51, 1996b (in Chinese).
- Li, Z.L., Zhang, Y.L., Zhang, K., Ma, H.Z., Jiang, Z.H., Tong, G.S., Zhu, T.F., Li, Y.K., Wang, J.M., Li, X.R., and Zhao, C.G.: Dry matter production and its distribution of black locust (*Robinia pseudoacacia*) plantations in eastern Henan Province, Acta Agriculturae Universitatis Henanensis, 19(4), 382-392, 1985 (in Chinese).
- Liang, H.W., Wen, Y.G., Wu, G.X., Huang, X.Z., Zhou, G.F., and Chen, D.L.: Effects of successive rotations on growth and productivity of *Eucalyptus urophylla* × *E. grandis* short-rotation plantation, Journal of Fujian Forestry Science and Technology, 35(3): 14-18, 2008 (in Chinese).
- Liang, J.P., Zhang, B.X., Yang, H.B., Gu, Y.B., and Zhang, Y.L.: Study on tree biomass of *Pinus tabulaeformis* plantation, Journal of Shanxi Agricultural University, 20(4), 339-341, 2000 (in Chinese).
- Liang, K.N., Zhou, W.L., and Li, Y.Q.: Study on 6-year-old fertilizer trial of *Eucalyptus urophylla* plantation, Forest Research, 15(6), 644-653, 2002 (in Chinese).
- Liang, K.N., Zhou, W.L., and Li, Y.Q.: Effects of fertilization on biomass and nutrient contents of young *Eucalyptus urophylla* cl. MLA plantation, Forest Research, 17(3), 327-333, 2004 (in Chinese).
- Liang, N., Wang, W.B., and Tian, K.: Biomass distribution characteristics of 4- and 13-year-old *Betula alnoides* plantations, Journal of West China Forestry Science, 35(4), 188-192, 2006 (in Chinese).
- Liang, Y.X., Wei, Z.M., Yu, G.C., Qin, J., and Chen, J.C.: The biomass and productivity of *Michelia macclurei* plantation in southeast Guangxi, China Forestry Science and Technology, 24(5), 45-49, 2010 (in Chinese).
- Liao, H.Z., Zheng, Y.M., Zhang, C.N., and Chen, D.Y.: Study on the biomass of *Cinnamomum camphora* plantation,



- Forest Science and Technology, (9), 15-18, 1986 (in Chinese).
- Liao, H.Z., Zhang, C.N., and Chen, D.Y.: Study on the biomass of *Phoebe bournei* plantations, Journal of Fujian College of Forestry, 8(3), 252-257, 1988 (in Chinese).
- Liao, H.Z., Di, D.S., and Zhang, C.N.: Study on the productivity of *Ormosia hosiei* planation, Forest Science and Technology, (10), 5-9, 1992 (in Chinese).
- Lin, W.J.: Study on the productivity and nutrient elements cycling of *Cunninghamia lanceolata* plantation in mid-mountain regions of Laoshan Forest Farm, Tianlin County, Journal of Guangxi Agricultural College, 10(4), 27-39, 1991 (in Chinese).
- Lin, W.F., and Lin, D.X.: Biomass and productivity of *Pinus massoniana* plantation, Journal of Heilongjiang Vocational Institute of Ecological Engineering, 23(5), 19-21, 2010 (in Chinese).
- Lin, K.M., Zheng, Y.S., Huang, Z.Q., and Wu, Z.X.: Study on the models for biomass of young Chinese fir and Masson pine plantation, Journal of Fujian College of Forestry, 13(4), 351-356, 1993 (in Chinese).
- Lin, S.M., Xu, T.G., and Zhou, G.M.: Study on the biomass of Chinese fir plantation, Journal of Zhejiang Forestry College, 8(3), 288-294, 1991 (in Chinese).
- Lin, W.H., Chen, K.M., and Liu, Z.G.: Biomass and nutrient element content of *Eucalyptus camaldulensis* plantations of dry-hot valley in southwest Sichuan, Mountain Research, 12(4), 251-255, 1994 (in Chinese).
- Ling, L.: Growth rules of individual biomass of *Populus wenxianica* forest, Protection Forest Science and Technology, (3), 9-11, 2011 (in Chinese).
- Liu, B.: Study on individual biomass and allocation pattern of *Pinus tabuliformis* natural forest in Helan Mountains, China, Thesis for Master's Degree, Northwest Agricultural and Forestry University, Yangling, China, 46pp., 2010 (in Chinese).
- Liu, F.M.: Biomass and nutrient storage of *Pinus massoniana* plantation on different slope positions, Journal of Fujian Forestry Science and Technology, 22(S1), 7-11, 1995a (in Chinese).

- Liu, Q.: Biomass and productivity of different age-group *Pinus massoniana* plantations, Journal of Central South Forestry University, 16(4), 47-51, 1996 (in Chinese).
- Liu, T.T.: Calculating biomass and carbon storage of poplar plantation based on tree structure, Thesis for Master's Degree, Beijing Forestry University, Beijing, China, 52pp., 2009.
- Liu, W.Y.: Study on the biomass and productivity of *Acacia dealbata* plantation in the protected district of water sources in north Kunming, Guihaia, 15(4), 327-334, 1995b (in Chinese).
- Liu, X.Y.: Study on the biomass of *Pinus elliottii* plantation in red soil hills, Forest Science and Technology, (9), 10-13, 1984 (in Chinese).
- Liu, Y.C.: Tree biomass of *Pinus taiwanensis* plantation, Journal of Henan Agricultural College, (2), 21-31, 1980 (in Chinese).
- Liu, E., and Liu, S.R.: Carbon storage and distribution pattern of *Mytilaria laosensis* plantation in south subtropical area, Acta Ecologica Sinica, 32(16), 5103-5109, 2012 (in Chinese).
- Liu, K., and Chen, Y.E.: Biological productivity of *Robinia pseudoacacia* plantation in the Loess Plateau Area of the north Weihe River, Acta Botanica Boreali-Occidentalia Sinica, 9(3), 197-201, 1989 (in Chinese).
- Liu, X.Z., and Cai, B.Y.: Comparative study between the biomass of *Pinus massoniana* plantation and *P. elliottii* plantation, Forest Resources Management, (5), 28-31, 1993 (in Chinese).
- Liu, X.Z., and Kang, W.X.: The biomass of *Eucommia ulmoides* plantation, *Phellodendron chinense* plantation, and *Magnolia officinalis* var. *biloba* plantation, in: Long-term Located Research on Forest Ecosystems, Liu, X.Z., Kang, W.X., Chen, X.Y., Wen, S.Z., eds., China Forestry Publishing House, Beijing, China, 49-52, 1993 (in Chinese).
- Liu, Z.G., and Ma, Q.Y.: An approach to methods for estimating biomass of *Larix principis-rupprechtii* artificial forests, Journal of Beijing Forestry University, 14(S), 105-113, 1992 (in Chinese).
- Liu, B., Liu, J.J., Ren, J.H., and Du, C.X.: Individual biomass regression models for *Pinus tabulaeformis* natural forest in

- Helan Mountains, Journal of Northwest Forestry University, 25(6), 69-74, 2010 (in Chinese).
- Liu, E., Wang, H., and Liu, S.R.: Characteristics of carbon storage and sequestration in different aged beech (*Castanopsis hystrix*) plantations in south subtropical area of China, Chinese Journal of Applied Ecology, 23(2), 35-340, 2012 (in Chinese).
- Liu, G.Y., Zhao, G.H., Wang, G.H., Ma, C.M., and Li, J.: Biomass allocation pattern of *Larix principis-rupprechtii* plantation, Hebei Journal of Forestry and Orchard Research, 26(3), 222-226, 2011a (in Chinese).
- Liu, S.R., Chai, Y.X., Cai, T.J., and Peng, C.H.: Study on the biomass and net primary productivity of Dahurian larch plantation, Journal of Northeast Forestry University, 18(2), 40-45, 1990 (in Chinese).
- Liu, T.T., Chen, J., Zhuang, J.L., and Guan, W.B.: Biomass and carbon storage of poplar plantation, China Science and Technology Fortune Magazine, (8), 192-194, 2009 (in Chinese).
- Liu, X.Z., Xiang, W.H., and Kang, W.X.: Biomass dynamical pattern in a Chinese fir plantation ecosystem, in: Long-term Located Research on Forest Ecosystems, Liu, X.Z., Kang, W.X., Chen, X.Y., Wen, S.Z., eds., China Forestry Publishing House, Beijing, China, 8-22, 1993 (in Chinese).
- Liu, X.Z., Wen, S.Z., and Xiang, W.H.: Effect of thinning on the biomass of *Pinus massoniana* plantation, Forest Resources Management, (5), 43-48, 1995a (in Chinese).
- Liu, X.Z., Tian, D.L., Kang, W.X., and Fang, H.B.: The biomass of a young second-generation Chinese fir plantation, Scientia Silvae Sinicae, 33(2), 61-66, 1997 (in Chinese).
- Liu, Y.B., Zhang, Y.L., Zhao, T.S., Li, Z.L., Shi, Z.X., Li, Z.A., Zhang, Y.L., Meng, X.T., Hao, Z.Y., Mao, X.Q., Zhang, Y.S., and Dong, C.Y.: Biomass and productivity of the agroforestry ecosystems, Journal of Henan Agricultural College, (1), 13-20, 1984 (in Chinese).
- Liu, Y.C., Wu, M.Z., Guo, Z.M., Jiang, Y.X., Liu, S.R., Wang, Z.Y., Liu, B.D., and Zhu, X.L.: Biomass and net productivity of *Quercus variabilis* forest in Baotianman Nature Reserve, Chinese Journal of Applied Ecology, 9(6), 569-574, 1998 (in Chinese).

- Liu, Y.C., Wu, M.Z., Guo, Z.M., Jiang, Y.X., Liu, S.R., Wang, Z.Y., Liu, B.D., and Zhu, X.L.: Biomass and net productivity of *Quercus acutidentata* forest in Baotianman Nature Reserve, *Acta Ecologica Sinica*, 21(9), 1450-1456, 2001 (in Chinese).
- Liu, Y.C., Jiang, Y.B., Chen, H.W., and Li, J.: Regression equations for individual tree of *Betula alnoides* plantation, *Journal of Fujian Forestry Science and Technology*, 35(2), 42-46, 2008 (in Chinese).
- Liu, Y.H., Wang, Y.H., Yu, P.T., Xiong, W., Mo, F., and Wang, Z.Y.: Biomass and its allocation of the main vegetation types in Liupan Mountains, *Forest Research*, 24(4), 443-452, 2011b (in Chinese).
- Liu, Z.Q., Chen, G.H., Meng, Y.Q., Li, J.G., and Liu, M.R.: Biomass and nutrient storage of *Larix principis-rupprechtii* plantation, *Forest Research*, 8(1), 88-93, 1995b (in Chinese).
- Long, S.M., and Wang, Y.: Biomass and economic benefits of *Casuarina equisetifolia* plantation, *Central South Forest Inventory and Planning*, (2), 25-34, 1985 (in Chinese).
- Lu, Q., Li, Z.J., and Li, X.D.: The models of biological productivity of *Castanopsis fargesii* forest, *Journal of Guangxi Agricultural College*, 9(3), 55-64, 1990 (in Chinese).
- Lu, S.W., Cao, Y.S., Li, F.S., Chen, F.J., Liu, T., and Yang, Z.: The volume and biomass of *Larix principis-rupprechtii* plantation in mountainous areas of northwest Hebei Province, *Forest Resources Management*, (1), 33-36, 2012 (in Chinese).
- Lu, X.Y., Chen, S.X., Li, M.Q., and Chang, X.M.: The biomass of *Paulownia elongata* in Paulownia-crop intercropping ecosystem, *Paulownia and Agroforestry*, (1), 12-23, 1990 (in Chinese).
- Lu, Y.S., Liang, Z.H., Wu, Z.X., Cai, Y.P., Zhou, K.M., Yang, G.F., and Yin, Z.X.: Biomass and productivity of main afforestation tree species on the seawall of northern Jiangsu, *Journal of Jiangsu Forestry Science and Technology*, 27(2), 12-15, 2000 (in Chinese).
- Luan, K.Z., and Liu, Z.G.: Biomass estimation models for *Pinus sylvestris* var. *mongolica* plantation, *Forestry Science and Technology*, 37(3), 35-38, 2012 (in Chinese).

- Luo, R.: Effect of intermediate cutting on biological productivity of *Pinus massoniana* plantation, Journal of Sichuan Forestry Science and Technology, 13(2), 29-34, 1992 (in Chinese).
- Luo, W.X., Liu, G.Q., Tang, D.R., and Ma, S.T.: Growth increment and biomass of *Eucommia ulmoides* plantation in Weibei Loess Plateau, Journal of Northwest Forestry University, 9(4), 22-26, 1985 (in Chinese).
- Luo, Y.J., Zhang, X.Q., Wang, X.K., Zhu, J.H., Zhang, Z.J., Sun, G.S., and Gao, F.: Biomass and its distribution patterns of *Larix principis-rupprechtii* plantations in northern China, Journal of Beijing Forestry University, 31(1), 13-18, 2009 (in Chinese).
- Lyu, X.T., Tang, J.W., He, Y.C., Duan, W.G., Song, J.P., Xu, H.L., and Zhu, S.Z.: Biomass and its allocation in tropical seasonal rain forest in Xishuangbanna, southwest China, Chinese Journal of Plant Ecology, 31(1), 11-22, 2007.
- Ma, Q.Y.: A study on the biomass and primary productivity of Chinese pine (*Pinus tabuliformis* Carr.) forests, PhD dissertation, Beijing Forestry University, Beijing, China, 178pp., 1988 (in Chinese).
- Ma, Q.Y.: A study on the biomass of Chinese pine forests, Journal of Beijing Forestry University, 11(4), 1-10, 1989 (in Chinese).
- Ma, W.: Measurement and estimation of ecosystem carbon density for *Larix olgensis* plantation based on FIM and FFE-FVS, PhD Dissertation, Beijing Forestry University, Beijing, China, 206pp., 2012 (in Chinese).
- Ma, X.X., and Li, W.J.: Biomass table of Korean pine natural forest in northern Changbai Mountains, Forest Investigation Design, (3), 74-75, 2008 (in Chinese).
- Ma, M.D., Jiang, H., and Yang, J.Y.: The biomass of *Phoebe bournei* plantation in the western boundary of Sichuan Basin, Journal of Sichuan Forestry Science and Technology, 10(3), 6-14, 1989 (in Chinese).
- Ma, W., Sun, Y.J., Guo, X.Y., Ju, W.Z., and Mu, J.S.: Carbon storage of *Larix olgensis* plantation at different stand ages, *Acta Ecologica Sinica*, 30(17), 4659-4667, 2010 (in Chinese).
- Ma, Z.W., Bi, J., Meng, X.S., and Li, Z.C.: Individual biomass of *Platycladus orientalis* plantation, Journal of Hebei Forestry Science and Technology, (3), 1-3, 2006 (in Chinese).

- Mei, L.: Fine root turnover and carbon allocation in Manchurian ash and Dahurian larch plantations, PhD Dissertation, Northeast Forestry University, Harbin, China, 102pp., 2006 (in Chinese).
- Mei, L., Zhang, Z.W., Gu, J.C., Quan, X.K., Yang, L.J., and Huang, D.: Carbon and nitrogen storages and allocation in tree layers of *Fraxinus mandshurica* and *Larix gmelinii* plantations, Chinese Journal of Applied Ecology, 20(8), 1791-1796, 2009 (in Chinese).
- Meng, L., Cheng, J.M., Yang, X.M., Han, J.J., Fan, W.J., and Hu, X.J.: Carbon storage and density of *Pinus tabuliformis* plantation in Ziwuling Forest Region of the Loess Plateau, Bulletin of Soil and Water Conservation, 30(2), 133-137, 2010 (in Chinese).
- Ming, A.G., Tang, J.X., Yu, H.L., Shi, Z.M., Lu, L.H., Jia, H.Y., and Cai, D.X.: Individual biomass regression model of *Mytilaria laosensis* in southwest Guangxi, Forest Resources Management, (6), 83-87, 93, 2011 (in Chinese).
- Ming, A.G., Zhang, Z.J., Chen, H.H., Zhang, X.Q., Tao, Y., and Su, Y.: Effect of thinning on the biomass and carbon storage in *Pinus massoniana* plantation, Scientia Silvae Sinicae, 49(10), 1-6, 2013 (in Chinese).
- Mo, D.X.: Study on carbon and nitrogen pattern and ecosystem biomass of *Cryptomeria fortunei* plantation of different density in southeastern Guangxi Province, Thesis for Master's Degree, Guangxi University, Nanjing, China, 52pp., 2013 (in Chinese).
- Mu, T.M.: Study on the biomass of *Picea crassifolia* forest in Helan Mountains, Inner Mongolia Forestry Science and Technology, (1), 34-45, 1981 (in Chinese).
- Mu, C.C., Wan, S.C., Su, P., Song, H.W., and Zun, Z.H.: Biomass distribution patterns of *Alnus hirsuta* and *Betula platyphylla*-swamp ecotone communities in Changbai Mountains, Chinese Journal of Applied Ecology, 15(12), 2211-2216, 2004 (in Chinese).
- Mu, C.C., Wang, B., Lu, H.C., Bao, X., and Cui, W.: Carbon storage of natural wetland ecosystem in Daxing'anling of China, Acta Ecologica Sinica, 33(16), 4956-4965, 2013 (in Chinese).
- Mu, L.Q., Liu, X.J., Xu, H., Li, G.X., and Guo, B.Q.: Analysis on key factors affecting the biomass of *Picea koraiensis*

- artificial forests, *Journal of Northeast Forestry University*, 23(6), 95-102, 1995a (in Chinese).
- Mu, L.Q., Zhang, J., Liu, X.J., Wu, S.N., and Yang, G.C.: Study on the tree biomass of *Picea koraiensis* artificial forests, *Bulletin of Botanical Research*, 15(4), 551-557, 1995b (in Chinese).
- Ning, X.B., and Liu, Q.: Biological productivity of young *Pinus massoniana* plantation in different regions, *Forest Resources Management*, (1), 48-51, 1996 (in Chinese).
- Ouyang, S.L., Dai, C.D., Hou, Y.N., Xu, Y.X., and Luo, J.: Biomass models for main constructive tree species of the protection forest system around Dongting Lake, *Hunan Forestry Science and Technology*, 37(5), 22-24, 2010 (in Chinese).
- Pan, K.W., and Liu, Z.G.: The biomass of 10-year-old *Cercidiphyllum japonicum* plantation, *Chinese Journal of Applied and Environmental Biology*, 5(2), 121-130, 1999 (in Chinese).
- Pan, R.D., and Wu, H.L.: Community structure of *Acacia mearnsii* plantation, *Journal of Zhejiang Forestry College*, 5(1), 28-35, 1988 (in Chinese).
- Pan, F.J., Zhang, Z.F., Huang, Y.Q., and Mo, L.: Aboveground biomass of *Cyclobalanopsis glauca* analyzed by tree-ring method in karst region, *Guihaia*, 32(4), 464-467, 2012 (in Chinese).
- Pan, P., Li, R.W., Qin, Z.G., Quan, M.J., and Cao, J.: The biomass and productivity of *Eucommia ulmoides* plantation, *Resources and Environment in the Yangtze Basin*, 9(1), 71-77, 2000 (in Chinese).
- Pan, P., Li, R.W., Xiang, C.H., Zhu, Z.F., and Yin, X.M.: The biomass and productivity of *Cupressus lusitanica* plantation, *Resources and Environment in the Yangtze Basin*, 11(2), 133-136, 2002 (in Chinese).
- Pan, W.C., Li, L.C., Gao, Z.H., Zhang, X.Q., and Tang, D.Y.: The biomass and productivity of Chinese fir plantations, *Hunan Forestry Science and Technology*, (5), 1-12, 1978 (in Chinese).
- Pan, W.C., Tian, D.L., Li, L.C., and Gao, Z.H.: Study on the nutrient cycling in Chinese fir plantation: (1) Biomass allocation and nutrient dynamics of Chinese fir plantations with different stand ages, *Journal of Central South Forestry Institute*, (1), 1-21, 1981 (in Chinese).

- Pan, W.C., Tian, D.L., Lei, Z.X., and Kang, W.X.: Study on the nutrient cycling in Chinese fir plantation: (2) Content, accumulation rate and biological cycling of nutrient elements in the fast-growing Chinese fir forest in the hilly regions, *Journal of Central South Forestry Institute*, 3(1), 1-17, 1983 (in Chinese).
- Pan, Y.J., Wang, B., Chen, B.F., and Peng, Q.Z.: Carbon sink of Chinese fir plantation ecosystem in Dagang Mountain, Jiangxi Province, *Journal of Central South University of Forestry and Technology*, 33(10), 120-125, 2013 (in Chinese).
- Pang, J.P.: Carbon storage and its allocation of rubber plantation in Xishuangbanna, southwest China, Thesis for Master's Degree, Xishuangbanna Tropical Botanical Garden, Chinese Academy of Sciences, Xishuangbanna, China, 54pp., 2009 (in Chinese).
- Peng, H.C.: Biomass measurement of *Eucommia ulmoides* plantation, *Nonwood Forest Research*, 10(2), 28-33, 1992 (in Chinese)
- Peng, S.L., and Zhang, Z.P.: Biomass and primary productivity of two dominant species, *Cryptocarya concinna* and *C. chinensis*, of forest vegetation in Dinghu Mountain, *Acta Phytoecologica et Geobotanica Sinica*, 14(1), 23-32, 1990 (in Chinese).
- Peng, S.L., and Zhang, Z.P.: Biomass and primary productivity of dominant species *Aporosa yunnanensis* and *Blastus cochinchinensis* of forest vegetation in Dinghu Mountain, *Chinese Journal of Applied Ecology*, 3(3), 202-206, 1992 (in Chinese).
- Peng, P.H., Peng, J.S., Wang, C.S., and Wang, J.X.: The biomass and productivity of *Populus schneideri* var. *tibetica* plantation, *Forestry Science and Technology*, 28(4), 14-18, 2003 (in Chinese).
- Peng, S.L., Li, M.G., and Lu, Y.: A preliminary study on the biomass and productivity of *Pinus massoniana* population in Dinghushan Biosphere Reserve, in: *Tropical and Subtropical Forest Ecosystem*, Volume 5, Dinghushan Forest Ecosystem Station, eds., Science Press, Beijing, China, 75-82, 1989 (in Chinese).
- Peng, S.L., Yu, Z.Y., Zhang, W.Q., and Zeng, X.P.: Coenological analysis of five man-made forests on the downland of



- Heshan, Guangdong Province, *Acta Phytoecologica et Geobotanica Sinica*, 18(1), 1-10, 1992 (in Chinese).
- Peng, S.L., Fang, W., Cao, H.L., Yu, Z.Y., and Ren, H.: Influence of human disturbance on tropical artificial *Eucalyptus* forest ecosystem, *Acta Ecologica Sinica*, 15(S1), 31-37, 1995 (in Chinese).
- Qi, L.H.: Study on the comprehensive managing technologies of aerially seeded *Pinus massoniana* stands in Hunan Province, Thesis for Master's Degree, Central South Forestry University, Zhuzhou, China, 59pp., 2003 (in Chinese).
- Qi, J.F., and Tang, J.W.: Biomass and its allocation pattern of limestone monsoon rain forest in Xishuangbanna, *Chinese Journal of Ecology*, 27(2), 167-177, 2008 (in Chinese).
- Qi, X.S., and Zhou, C.R.: Community characteristics and the biomass of *Platycladus orientalis* and *Pinus tabulaeformis* mixed plantation, *Journal of Shandong Forestry Science and Technology*, (2), 1-5, 1991 (in Chinese).
- Qi, G., Wang, Q.L., Wang, X.C., Qi, L., Wang, Q.W., Ye, Y.J., and Dai, L.M.: Vegetation carbon storage in *Larix gmelinii* plantations in Daxing'an Mountains, *Chinese Journal of Applied Ecology*, 22(2), 273-279, 2011.
- Qi, L.H., Zhang, X.D., Zhou, J.X., Li, Z.H., Huang, L.L., and Yang, M.H.: Changing regularity and structural characteristics of the biomass and productivity of aerially seeded *Pinus massoniana* plantation, *Forest Research*, 20(3), 344-349, 2007 (in Chinese).
- Qi, Z.Y., Ma, J.X., and Li, S.M.: The biomass and productivity of artificial *Michelia macclurei* forest, *Chinese Journal of Ecology*, (2), 17-19, 30, 1985 (in Chinese).
- Qian, G.Q.: Dynamics of the net primary productivity of *Liquidambar formosana* plantation, *Acta Agriculturae Universitatis Jiangxiensis*, 22(3), 399-404, 2000 (in Chinese).
- Qin, Z.G.: Community features and the biomass of *Alnus cremastogyne* fuelwood forest, *Journal of Sichuan Forestry Science and Technology*, 13(1), 24-28, 33, 1992 (in Chinese).
- Qin, J., Meng, H.S., Qin, W.M., Yu, J.M., and Qin, D.W.: The biomass and productivity of *Tsoongiodendron odorum* plantation, *China Forestry Science and Technology*, 25(6), 65-68, 2011a (in Chinese).

- Qin, L., He, Y.J., Li, Z.Y., Shao, M.X., Liang, X.Y., and Tan, L.: Allocation pattern of biomass and productivity for three plantations of *Castanopsis hystrix*, *Pinus massoniana* and their mixture in south subtropical area of Guangxi, China, *Scientia Silvae Sinicae*, 47(12), 17-21, 2011b (in Chinese).
- Qin, S.J., Li, K., Mo, D.X., and Wu, Q.B.: Biomass regression model of *Cryptomeria fortunei* plantation in southeast Guangxi, *Journal of Southern Agriculture*, 44(2), 261-265, 2013 (in Chinese).
- Qin, W.M., Qiu, B.F., Qin, J., Xu, T.B., and Qin, D.W.: The biomass and growth rhythm of *Paramichelia baillonii* plantation, *Journal of Fujian College of Forestry*, 31(2), 110-114, 2011c (in Chinese).
- Qiu, X.Z., Xie, S.C.: Studies on The Forest Ecosystem in Ailao Mountains, Yunnan, China, Yunnan Science and Technology Press, Kunming, China, 1998 (in Chinese)
- Qiu, X.Z., Xie, S.C., and Jing, G.F.: A preliminary study on the biomass of *Lithocarpus xylocarpus* forest in Xujiaba Region, Ailao Mountain, Yunnan, *Acta Botanica Yunnanica*, 6(1), 85-92, 1984 (in Chinese).
- Qiu, Y., Zhang, J.T., Chai, B.F., and Zheng, F.Y.: The aboveground biomass and productivity of *Pinus tabuliformis* planted forest in the west of Shanxi Province, *Henan Science*, 17(S), 72-76, 79, 1999 (in Chinese).
- Shen, Y.: Biomass and nutrient cycling of natural secondary mixed forest in subtropical area, Thesis for Master's Degree, Central South University of Forestry and Technology, Changsha, China, 116pp., 2011 (in Chinese).
- Shen, J.P., Zhang, W.H., Li, Y.H., You, J.J., Yu, B.Y., Yang, X.Z., and He, J.F.: Characteristics of carbon storage and sequestration of *Pinus tabuliformis* forest land converted from farmland in the loess hilly area, *Acta Botanica Boreali-Occidentalia Sinica*, 33(11), 2309-2316, 2013 (in Chinese).
- Shen, Y., Tian, D.L., Yan, W.D., and Xiao, Y.: Biomass and its distribution of natural secondary *Quercus fabri* + *Sassafras tsumu* + *Cunninghamia lanceolata* community in Yuanling County, Hunan Province, *Journal of Central South University of Forestry and Technology*, 31(5), 44-51, 2011a (in Chinese).
- Shen, Y.Z., Sun, X.M., Zhang, J.T., Du, Y.C., and Ma, J.W.: Individual tree biomass of *Larix kaempferi* plantation in Xiaolong Mountain, Gansu Province, *Forest Research*, 24(4), 517-522, 2011b (in Chinese).

- Shen, Z.K., Lu, S.P., and Ai, X.R.: The biomass and productivity of *Larix kaempferi* plantation, Journal of Hubei Institute for Nationalities (Natural Science Edition), 23(3), 289-292, 2005 (in Chinese).
- Shi, Y.L.: Study on the ecosystem biomass of the artificial *Cunninghamia lanceolata* forest in Changling (Wanli District), Nanchang City, Acta Agriculturae Universitatis Jiangxiensis, 11(4), 32-45, 1989 (in Chinese).
- Shi, P.L., Zhong, Z.C., and Li, X.G.: A study on the biomass of alder-cypress artificial mixed forest in Sichuan, Acta Phytoecologica Sinica, 20(6), 524-533, 1996 (in Chinese).
- Shi, P.L., Yang, X., and Zhong, Z.C.: Dynamics of population biomass and its density-dependent regulation in alder and cypress mixed forest, Chinese Journal of Applied Ecology, 8(4), 341-346, 1997 (in Chinese).
- Shi, Z., Liu, J., Lan, X., Liang, D., Lu, M.B., and Deng, M.Y.: Individual biomass regression models of *Pinus massoniana* plantation in Tianlin County, Guangxi Province, Guangxi Forestry Science, 38(3), 167-170, 2009 (in Chinese).
- Si, J.P., Yao, R.M., Chen, D.B., and Wu, C.H.: The biomass of *Magnolia officinalis* plantation, Journal of Zhejiang Forestry College, 10(2), 162-168, 1993 (in Chinese).
- Song, D.Q., Jiang, Z.L., Zheng, Z.M., and He, W.P.: Study on the biomass of *Betula luminifera* population, Journal of Nanjing Forestry University (Natural Science Edition), 26(3), 40-42, 2002 (in Chinese).
- Su, Y.M.: Study on the biomass and productivity of *Larix kaempferi* plantation, Journal of Sichuan Forestry Science and Technology, 16(3), 36-42, 1995 (in Chinese).
- Su, Y., Qin, W.M., Huang, S.D., Duan, W.W., Wei, Z.M.: The biomass and productivity of *Parashorea chinensis* plantation in the southwest Guangxi, Practical Forestry Technology, (9), 16-19, 2011 (in Chinese).
- Su, Y.M., Liu, X.L., Xiang, C.H.: Study on the biomass and net primary productivity of *Abies fabri* plantation, Journal of Sichuan Forestry Science and Technology, 21(2), 31-35, 2000 (in Chinese).
- Sun, B.G., Chen, F., Wang, J.M., Chen, X.M., Yang, Z.X., Cai, X.Y., and Li, B.: Biomass distribution pattern of *Pinus yunnanensis* with different diameter classes, Forest Research, 25(1), 71-76, 2012a (in Chinese).

- Sun, D., Ruan, H.H., and Ye, J.Z.: The biomass structure of the secondary natural oakery in Kongqing Hill, in: Proceedings of forest ecosystems on Xiashu Ecological Station, Jiang, Z.L., eds., China Forestry Publishing House, Beijing, China, 16-22, 1992 (in Chinese).
- Sun, N., Li, Y.Z., and Zhang, Y.C.: Influence of afforestation density on the biomass of hybrid larch, Forestry Science and Technology, 37(4), 14-16, 2012b (in Chinese).
- Sun, Q.X., Yu, F.A., and Peng, Z.H.: The biomass of poplar plantation in the beach land of Yangtze River, Forest Science and Technology, (3), 4-6, 1998 (in Chinese).
- Tang, L.Z., and Sun, Y.L.: Effect of water table on the growth of I-69 poplar in Lixiahe wetland, Jiangsu Province, China, Wetland Science, 5(2), 140-145, 2007 (in Chinese).
- Tang, W., and Xu, R.Q.: Study on the biomass of *Abies fabri* plantation, Sichuan Forestry Exploration and Design, (2), 27-32, 1993 (in Chinese).
- Tang, J.W., Pang, J.P., Chen, M.Y., Guo, X.M., and Zeng, R.: Biomass and its estimation model of rubber plantations in Xishuangbanna, southwest China, Chinese Journal of Ecology, 28(10), 1942-1948, 2009 (in Chinese).
- Tang, J.W., Zhang, J.H., Song, Q.S., Cao, M., Feng, Z.L., Dang, C.L., and Wu, Z.L.: A preliminary study on the biomass of secondary tropical forest in Xishuangbanna, Acta Phytocologica Sinica, 22(6), 489-498, 1998 (in Chinese).
- Tang, L.Z., Haibara, K., Huang, B.L., Toda, H., Yang, W.Z., and Arai, T.: Storage and dynamics of carbon in a poplar plantation in Lixiahe Region, Jiangsu Province, Journal of Nanjing Forestry University (Natural Science Edition), 28(2), 1-6, 2004a (in Chinese).
- Tang, L.Z., Yu, M.K., Yan, C.F., Liu, Z.L., and Fang, S.Z.: Effects of site condition and cultivation on the growth of sawtooth oak plantations, Journal of Fujian College of Forestry, 28(2), 130-135, 2008 (in Chinese).
- Tang, W.P., Wang, Y.R., and Zheng, L.Y.: Study on the biomass and productivity of southern type poplar plantation, Hubei Forestry Science and Technology, (S), 43-47, 2004b (in Chinese).

- Tian, D.L., Pan, W.C., Lei, Z.X., Long, E.H., and Cai, B.Y.: A preliminary study on the biomass and density effects of *Pinus massoniana* plantation, Journal of Central South Forestry Institute, 2(1), 41-50, 1982 (in Chinese).
- Tian, D.L., Zhang, C.J., Luo, Z.P., and Yuan, W.X.: Biomass and distribution of nutrient elements in natural *Sassafras tzumu* mixed forest: (1) The biomass and productivity, Journal of Central South Forestry College, 10(2), 121-128, 1990 (in Chinese).
- Tian, D.L., Pan, H.H., Kang, W.X., and Fang, H.B.: The biomass of a second-generation Chinese fir plantation, Journal of Central South Forestry University, 18(3), 11-16, 1998 (in Chinese).
- Tian, D.L., Xiang, W.H., Yan, W.D., and Kang, W.X.: Effect of successive rotation on the biomass and productivity of Chinese fir plantation at fast-growing stage, Scientia Silvae Sinicae, 38(4), 14-18, 2002 (in Chinese).
- Tian, D.L., Yin, G.Q., Fang, X., Xiang, W.H., and Yan, W.D.: Carbon density, storage and spatial distribution under different ‘Grain for Green’ patterns in Huitong, Hunan Province, Acta Ecologica Sinica, 30(22), 6297-6308, 2010 (in Chinese).
- Tian, Q.F., Du, L.H., and Li, X.J.: Study on the biomass of *Robinia pseudoacacia* plantation in Xishan National Forest Park, Beijing, Journal of Beijing Forestry University, 19(S2), 104-107, 1997a (in Chinese).
- Tian, Q.F., Yan, H.P., and Wang, P.X.: Comparison of the productivity between three deciduous broadleaved plantations, Journal of Beijing Forestry University, 19(S2), 118-122, 1997b (in Chinese).
- Tian, Q.F., Zhou, R.W., and Zhang, J.S.: Study on the biomass of *Quercus variabilis* plantation in Xishan National Forest Park, Beijing, Journal of Beijing Forestry University, 19(S2), 113-117, 1997c (in Chinese).
- Tong, J.Q.: Study on the productivity and growth of Chinese fir plantations with different sites and densities, Journal of Fujian Agriculture and Forestry University (Natural Science Edition), 37(4), 369-373, 2008 (in Chinese).
- Wan, S.C.: The biomass allocation patterns of constructive tree species in forest-swamp ecotone, Journal of Mudanjiang University, 22(8), 124-127, 2013 (in Chinese).
- Wan, M., Tian, D.L., Fan, W., and Li, Q.Y.: Biomass production and carbon sequestration in poplar-crop agroforestry

- ecosystems in eastern Henan Plain, *Scientia Silvae Sinicae*, 45(8), 27-33, 2009 (in Chinese).
- Wang, B.: Carbon storage of natural wetland ecosystem in southern Daxing'an Mountains of China, Thesis for Master's Degree, Northeast Forestry University, Harbin, China, 39pp., 2013 (in Chinese).
- Wang, C.K.: Biomass allometric equations for 10 co-occurring tree species in Chinese temperate forests, *Forest Ecology and Management*, 222, 9-16, 2006.
- Wang, J.: Community characteristics and biomass of young mixed plantation of *Alnus cremastogyne* and *Cupressus funebris*, *Sichuan Forestry Science and Technology*, 14(1), 66-69, 1993.
- Wang, L.M.: Biomass determination of stem, branch and needle of *Pinus sylvestris* var. *mongolica* natural forest, *Journal of Inner Mongolia Forestry College*, (2), 63-68, 1986 (in Chinese).
- Wang, M.B.: The biomass and afforestation prospect of *Pinus tabuliformis* plantation in the northwest Shanxi Province, *Journal of Shanxi University (Natural Science Edition)*, (4), 98-102, 1988 (in Chinese).
- Wang, M.B.: The biomass of *Populus hopeiensis* forest, *Journal of Shanxi University (Natural Science Edition)*, 14(1), 103-107, 1991 (in Chinese).
- Wang, W.C.: The aboveground biomass of *Pinus tabuliformis* plantation, *Shanxi Forestry Science and Technology*, (2), 10-15, 1985 (in Chinese).
- Wang, X.Y.: Carbon storage distribution of *Larix olgensis* plantation at different stand ages, PhD Dissertation, Beijing Forestry University, Beijing, China, 96pp., 2011 (in Chinese).
- Wang, J., and Wen, Z.W.: Aboveground biomass distribution and predictive model of secondary *Betula luminifera* forest in the northwest Guizhou Province, *Guizhou Forestry Science and Technology*, 39(2), 18-21, 2011 (in Chinese).
- Wang, Q.M., and Shi, Y.G.: A preliminary study on the biomass and production of slash pine plantation in Jiangsu Province, *Acta Phytocologica et Geobotanica Sinica*, 14(1), 1-12, 1990 (in Chinese).
- Wang, X.H., and Song, Y.C.: Dynamics of population and biomass at early natural recovery stage of vegetation on

- abandoned quarry of Tiantong National Forest Park, Chinese Journal of Applied Ecology, 10(5), 545-548, 1999 (in Chinese).
- Wang, Y.M., and Liu, B.Z.: Ecological Characteristics of Protection Forests in the Loess Plateau, China Forestry Publishing House, Beijing, China, 42-48, 1994 (in Chinese).
- Wang, Z., and Zhang, S.Y.: Larch Forests in China, China Forestry Publishing House, Beijing, China, 50-57, 1992 (in Chinese).
- Wang, Z.F., and Feng, Z.K.: The parameter estimation of tree biomass using the nonlinear least square method, Journal of Jilin Agricultural University, 28(3), 261-264, 2006 (in Chinese).
- Wang, B., Nie, D.P., Guo, Q.S., and Xia, L.F.: Studies on Forest Ecosystems in Dagang Mountains of Jiangxi Province, China Science and Technology Press, Beijing, China, 183-185, 2003a (in Chinese).
- Wang, C., Gao, H.Z., and Zang, Y.Q.: Study on the individual biomass of *Betula platyphylla* natural secondary forest, Forestry Science and Technology, 35(1), 7-9, 13, 2010 (in Chinese).
- Wang, D.Y., Li, D.Y., and Feng, X.Q.: Forest Ecosystems on Warm Temperate Zone, China Forestry Publishing House, Beijing, China, 190-205, 2003b (in Chinese).
- Wang, H.M., Chen, Z.J., and Li, X.W.: Biomass and nutrient content of different forest-grass ecosystems converted from farmlands, Research of Soil and Water Conservation, 12(2), 125-128, 2005 (in Chinese).
- Wang, H.Y., Wang, W.J., Qiu, L., Su, D.X., An, J., Zheng, G.Y., and Zu, Y.G.: Differences in biomass, litter layer mass and SOC storage changing with tree growth in *Larix gmelinii* plantations in northeast China, Acta Ecologica Sinica, 32(3), 833-843, 2012a (in Chinese).
- Wang, J.S., Zhang, C.Y., Fan, X.H., and Zhao, Y.Z.: Biomass allocation patterns and allometric models of *Abies nephrolepis*, Acta Ecologica Sinica, 31(14), 3918-3927, 2011a (in Chinese).
- Wang, J.S., Fan, X.H., Fan, J., Zhang, C.Y., and Xia, F.C.: Effect of aboveground competition on biomass partitioning of understory Korean pine (*Pinus koraiensis*), Acta Ecologica Sinica, 32(8), 2447-2457, 2012b (in Chinese).

- Wang, J.Y., Che, K.J., Fu, H.E., Chang, X.X., Song, C.F., and He, H.Y.: Study on the biomass of water conservation forest on the north slope of Qilian Mountains, *Journal of Fujian College of Forestry*, 18(4), 319-323, 1998 (in Chinese).
- Wang, N., Wang, B.T., Wang, R.J., Cao, X.Y., Wang, W.J., and Chi, L.: Biomass allocation patterns and allometric models of *Populus davidiana* and *Pinus tabuliformis* in the west Shanxi Province, *Bulletin of Soil and Water Conservation*, 33(2), 151-155, 159, 2013 (in Chinese).
- Wang, Q.C., Wang, Q.L., Li, D., Wu, N.S., and Cheng, Z.C.: Suitable management density of multi-benefit management pattern in *Pinus elliottii* plantation on hilly region of Jiangxi Province, *Chinese Journal of Applied Ecology*, 12(5), 663-666, 2001 (in Chinese).
- Wang, S.J., Chen, B.H., and Li, H.Q.: *Populus euphratica* Forests, China Environmental Science Press, Beijing, China, 1995.
- Wang, T., Yuan, Z.L., Ye, Y.Z., and Zhang, J.: Preliminary study on the biomass of *Platycladus orientalis* plantation at different stand ages in the Songshan Mountain National Forest Park, *Henan Science*, 27(7), 817-820, 2009 (in Chinese).
- Wang, X.W., Li, X.Y., Guan, X.D., and Bai, G.X.: Preliminary study on the biomass of *Larix olgensis* plantation, *Journal of Liaoning Forestry Science and Technology*, (6), 30-34, 1993 (in Chinese).
- Wang, X.Y., Hu, D., and He, J.S.: Study on the biomass of *Fagus engleriana* forest and *Quercus aliena* var. *acuteserrata* forest in Shennongjia Region, *Journal of Capital Normal University (Natural Science Edition)*, 28(2), 62-67, 2007a (in Chinese).
- Wang, X.Y., Sun, Y.J., and Ma, W.: Biomass and carbon storage distribution of *Larix olgensis* plantations with different density, *Journal of Fujian College of Forestry*, 31(3), 221-226, 2011b (in Chinese).
- Wang, Y., Li, Q., Zhang, P.Y., Wu, X.X., Jiang, Y.Z., and Jiang, J.T.: The biomass and nutritive element content of the fast-growing poplar plantations, *Journal of Shandong Forestry Science and Technology*, (2), 1-7, 1990 (in



Chinese).

- Wang, Y.T., Ma, Q.Y., Hou, G.W., Kan, Z.G., and Chen, Y.: Dynamics of the biomass and productivity of the naturally-regenerated *Pinus densata* forest in the burned areas of the western Sichuan Province, Forestry Science and Technology, 32(1), 37-40, 2007b (in Chinese).
- Wang, Z., Han, Y.J., Kang, H.Z., Huang, D., Xue, C.Y., Yin, S., and Liu, C.J.: Carbon storage of main water conservation plantations in the upper reaches of Huangpu River, Shanghai, Chinese Journal of Ecology, 31(8), 1930-1035, 2012c (in Chinese).
- Wei, Y.J.: Study on the biomass of *Fokienia hodginsii* plantations in south Fujian, Journal of Fujian Forestry Science and Technology, 28(3), 21-23, 38, 2001 (in Chinese).
- Wei, F., Li, X.X., Wen, Y.G., Liang, H.W., and Tang, C.Y.: An ecological study on Chinese fir plantation in Laoshan Mountain, Tianlin County, the northwest of Guangxi, Journal of Guangxi Agricultural College, 10(4), 1-26, 1991 (in Chinese).
- Wen, S.Z.: The biomass and productivity of *Castanopsis fissa* stand, in: Long-term Located Research on Forest Ecosystems, Liu, X.Z., Kang, W.X., Chen, X.Y., Wen, S.Z., eds., China Forestry Publishing House, Beijing, China, 42-48, 1993 (in Chinese).
- Wen, D.C., Deng, Z.R., and Xiang, H.H.: Study on the productivity of Ussuri poplar plantation, Journal of Northeast Forestry University, 15(2), 42-49, 1987 (in Chinese).
- Wen, D.Z., Wei, P., Kong, G.H., Zhang, Q.M., and Huang, Z.L.: Biomass study of the *Castanopsis chinensis* + *Cryptocarya concinna* + *Schima superba* community in Dinghushan Biosphere Reserve, Acta Ecologica Sinica, 17(5), 497-504, 1997 (in Chinese).
- Wen, D.Z., Wei, P., Zhang, Q.M., and Kong, G.H.: Study on the biomass of three subtropical evergreen broadleaved forests in Dinghushan Biosphere Reserve, Acta Phytocologica Sinica, 23(S), 11-21, 1999 (in Chinese).
- Wen, S.Z., Pan, W.C., Tian, D.L., and Kang, W.X.: Hydroecological benefits from Chinese fir plantation ecosystem:

- Preliminary report of comprehensive trial of small forested watershed, Journal of Central South Forestry College, 9(S), 11-22, 1989 (in Chinese).
- Wen, Y.G., Liang, L.R., Li, J.J., Wei, B.E., and Xiong, C.D.: Biological productivity of *Cunninghamia lanceolata* plantations in different ecogeographical regions, Guangxi, Journal of Guangxi Agricultural College, 7(2), 55-66, 1988 (in Chinese).
- Wen, Y.G., Liang, H.W., and Jiang, H.P.: The biomass and its distribution of Chinese fir plantations in Guangxi, Journal of Guangxi Agricultural University, 14(1), 55-64, 1995 (in Chinese).
- Wen, Y.G., He, T.P., Li, X.X., Liang, H.W., Zhou, J.Y., and Su, Y.J.: The biomass and productivity of *Eucalyptus exserta* coastal protection plantation in Hepu County, Guangxi, Journal of Guangxi Agricultural and Biological Science, 19(1), 1-5, 2000a (in Chinese).
- Wen, Y.G., Liang, H.W., Zhao, L.J., Zhou, M.Y., He, B., Wang, L.H., Wei, S.H., Zheng, B., Liu, D.J., and Tang, Z.S.: Biomass and productivity of *Eucalyptus urophylla* plantation, Journal of Tropical and Subtropical Botany, 8(2), 123-127, 2000b (in Chinese).
- Wu, Q.Z.: Study on the biomass of *Mytilaria laosensis* plantation, Journal of Fujian Forestry Science and Technology, 32(3), 125-129, 2005 (in Chinese).
- Wu, X.C.: Study on the productivity and carbon density of poplar-willow natural forest in Ergis River, Xinjiang, PhD Dissertation, Inner Mongolia Agricultural University, Huhhot, China, 109pp., 2009 (in Chinese).
- Wu, Z.L., and Dang, C.L.: Study on the biomass and net primary productivity of *Pinus kesiya* var. *langbianensis* stands in Changning District, Yunnan Province, Journal of Yunnan University (Natural Science Edition), 14(2), 137-145, 1992a (in Chinese).
- Wu, Z.L., and Dang, C.L.: Study on the biomass of *Pinus kesiya* var. *langbianensis* stands in Pu'er District, Yunnan Province, Journal of Yunnan University (Natural Science Edition), 14(2), 119-127, 1992b (in Chinese).
- Wu, Z.L., and Dang, C.L.: Preliminary study on the biomass and net primary productivity of *Quercus senescens* forest

- near Kunming, Journal of Yunnan University (Natural Science Edition), 16(3), 235-239, 244, 1994 (in Chinese).
- Wu, G., Feng, Z.W., Kong, H.M., and Qin, Y.Z.: The biomass and productivity of agroforestry ecosystems in northern Henan Province, Research of Agricultural Modernization, 14(2), 99-102, 1993 (in Chinese).
- Wu, H.X., Shi, Y.G., Zhang, H.Z., and Zhang, S.C.: Study on the biomass of *Pinus tabuliformis* plantation in Badaling Forest Farm, Hebei Journal of Forestry and Orchard Research, 21(3), 240-242, 2006 (in Chinese).
- Wu, M., Li, S.T., Qin, W.M., and Qin, X.L.: The biomass and productivity of 11-year-old *Michelia hedyosperma* plantation, Journal of West China Forestry Science, 42(4), 46-51, 2013 (in Chinese).
- Wu, P., Ding, F.J., Cui, Y.C., Zhu, J., and Li, C.R.: The biomass and productivity of young *Pinus massoniana* forests of Pearl River Shelterbelt Construction Project in Qiannan City, Guizhou Agricultural Sciences, 40(6), 169-172, 2012a (in Chinese).
- Wu, S.D., Ye, G.F., Pan, H.Z., Xu, J.S., Long, X.W., Zheng, R., and Huang, C.Y.: Biomass and its distribution of *Casuarina equisetifolia* plantation, Protection Forest Science and Technology, (S1), 21-24, 1996 (in Chinese).
- Wu, S.R., Yang, H.Q., Hong, R., Zhu, W., and Chen, X.Q.: The biomass and its distribution of *Pinus massoniana* plantation, Journal of Fujian Forestry Science and Technology, 26(1), 18-21, 1999 (in Chinese).
- Wu, T., Wang, Y., Yu, C.J., Chiarawipa, R., Zhang, X.Z., Han, Z.H., and Wu, L.H.: Carbon sequestration by fruit trees: Chinese apple orchards as an example, PLoS ONE, 7(6), e38883, 2012b.
- Wu, W.Y., Huang, Q.F., and Huang, C.L.: The biomass and growth increment of poplar plantations in the Nangeng marshlands of Yangtze River, Anhui Forestry Science and Technology, 38(2), 53-57, 72, 2012c (in Chinese).
- Wu, X.C., Zhang, Q.L., Lei, Q.Z., and Bai, Z.Q.: Biomass distribution characteristics of natural forests in Ergis River, Xinjiang, Forest Resources Management, (4), 61-67, 2009 (in Chinese).
- Wu, Z.L., Dang, C.L., He, Z.R., and Wang, C.Y.: Preliminary study on the biomass and net primary productivity of *Quercus pannosa* forest in the northwest Yunnan Province, Journal of Yunnan University (Natural Science Edition), 16(3), 245-249, 1994a (in Chinese).

- Wu, Z.L., Dang, C.L., He, Z.R., and Wang, C.Y.: Preliminary study on the biomass of *Picea brachyyla* var. *complanata* forests in the northwest Yunnan Province, Journal of Yunnan University (Natural Science Edition), 16(3), 230-234, 1994b (in Chinese).
- Wu, Z.L., Dang, C.L., Wang, C.Y., and He, Z.R.: Preliminary study on the biomass of *Pinus densata* forests in the northwest Yunnan Province, Journal of Yunnan University (Natural Science Edition), 16(3), 220-224, 1994c (in Chinese).
- Wu, Z.M., Sun, Q.X., and Duan, W.X.: Relationship between flooded situation and poplar growth on beach land of Yangtze river in Anhui, Chinese Journal of Applied Ecology, 11(1), 25-29, 2000 (in Chinese).
- Wu, Z.M., Sun, Q.X., and Chen, M.G.: Biomass and nutrient accumulation of poplar plantation in the beach land of Yangtze River in Anhui Province, Chinese Journal of Applied Ecology, 12(6), 806-810, 2001 (in Chinese).
- Xia, L.Y., Li, S.C., Liao, X.L., Wang, W.D., and Li, D.F.: A study on the biomass of slash pine (*Pinus elliottii*) plantation, Subtropical Forest Science and Technology, 15(1), 20-25, 1987 (in Chinese).
- Xiang, W.H., Chen, X.Y., and Cai, B.Y.: The time-lapse characteristics of the biomass in slash pine plantation, in: Long-term Located Research on Forest Ecosystem, Liu, X.Z., Kang, W.X., Chen, X.Y., Wen, S.Z., eds., China Forestry Publishing House, Beijing, China, 60-64, 1993 (in Chinese).
- Xiao, Y.: Study on the productivity of *Betula platyphylla* natural secondary forest, Acta Biologica Plateau Sinica, (8), 147-157, 1988 (in Chinese).
- Xiao, Y.: Comparative study on the biomass and productivity of *Pinus tabuliformis* plantations in different climatic zones, Shaanxi Province, Acta Phytoecologica et Geobotanica Sinica, 14(3), 237-246, 1990 (in Chinese).
- Xiao, Y.: Biomass and productivity of natural *Pinus henryi* forest, Acta Phytoecologica et Geobotanica Sinica, 16(3), 227-233, 1992 (in Chinese).
- Xiao, X.C., Li, Z.H., Tang, Z.J., Sheng, J.M., Gong, X.J., and Zhu, N.: Effects of stand density on the biomass and productivity of *Pinus elliottii* plantation, Journal of Central South University of Forestry and Technology, 31(3),

123-129, 2011 (in Chinese).

Xiao, Y., Wu, B.S., Chen, B.Q., Zhang, J.C., Wang, M.H., and Wang, L.G.: A preliminary study on the aboveground biomass of *Pinus tabulaeformis* plantation, Shanxi Forestry Science and Technology, (2), 5-14, 1983 (in Chinese).

Xiao, Y.T., He, A.H., and Liang, J.Z.: Community characteristics and the biomass of *Pinus taiwanensis* natural forest in Mufu Mountain of Hubei-Hunan border, Hunan Forestry Science and Technology, (4), 1-4, 1989 (in Chinese).

Xiao, Z.W., Wang, L.J., Mao, J.M., Zhu, X.Z., Wang, X.L., Zheng, L., and Tang, J.W.: Carbon storage of different tree-tea agroforestry systems in Xishuangbanna, Yunnan Province of southwest China, Chinese Journal of Ecology, 31(7), 1617-1625, 2012 (in Chinese).

Xie, W.D., Wen, Y.G., Zhou, M.Y., Liang, H.W., Liu, S.R., and Chen, F.: Biomass and productivity of *Eucalyptus urophylla* plantation in new cultivated areas, Journal of Central South University of Forestry and Technology, 27(5), 13-18, 2007 (in Chinese).

Xie, W.D., Wen, Y.G., Liang, H.W., Li, X.X., He, B., Zhong, J.B., Liao, G.S., and Liu, J.: The biomass and productivity of *Casuarina equisetifolia* shelterbelt in the coastal sandy land of Guangxi, Protection Forest Science and Technology, (5), 6-8, 2008 (in Chinese).

Xie, W.D., Ye, S.M., Yang, M., and Zhao, L.J.: Biomass and distribution pattern of *Pinus massoniana* plantation in the southeast Guangxi, Journal of Beihua University (Natural Science Edition), 10(1), 68-71, 2009 (in Chinese).

Xie, Z.S., Chen, B.G., Han, J.G., and Deng, Y.S.: The biomass estimative model of two *Eucalypts* in Leizhou Peninsula, in: Studies on the *Eucalypt* Ecosystem of Short Rotation in Leizhou, Zeng, T.X., eds., China Forestry Publishing House, Beijing, China, 66-75, 1995 (in Chinese).

Xu, X.Q., and Chen, Z.D.: A preliminary study of the biomass of cultivated Chinese white poplar stands, Journal of Nanjing Forestry University, (1), 130-136, 1987 (in Chinese).

Xu, Z.L., and Luo, T.Y.: A study on biomass structure of the natural secondary forest of *Pinus massoniana*, Acta Agriculturae Universitatis Jiangxiensis, 15(2), 168-173, 1993 (in Chinese).

- Xu, D.P., Yang, M.Q., Zeng, Y.T., and Li, W.X.: Aboveground primary productivity and nutrient cycling of *Acacia mangium* plantation, Guangdong Forestry Science and Technology, (4), 11-16, 1994a (in Chinese).
- Xu, D.P., Zeng, Y.T., and Li, W.X.: Aboveground biomass and nutrient cycling of young *Eucalyptus urophylla* plantation, Forest Research, 7(6), 600-605, 1994b (in Chinese).
- Xu, D.P., He, Q.X., Yang, Z.J., Long, Y.S., and Jian, X.H.: Aboveground primary productivity and nutrient cycling of *Eucalyptus grandis*  $\times$  *E. urophylla* plantation, Forest Research, 10(4), 365-372, 1997 (in Chinese).
- Xu, D.P., Bernie, D., Gong, M.Q., Nick, M., and Wang, Z.H.: Effects of phosphorus fertilization and ectomycorrhizal fungal inoculation on the productivity and nutrient accumulation of *Eucalyptus globulus* plantation, Forest Research, 17(1), 26-35, 2004 (in Chinese).
- Xu, F.W., Gao, Y.P., He, K.Q., Ding, F.J., and Dai, Q.H.: Biomass and net productivity of *Pinus massoniana* stands at different stand ages, Hubei Agricultural Sciences, 52(8), 1853-1858, 2013 (in Chinese).
- Xu, H.Y., Zheng, S.K., and Lu, Y.N.: The biomass of I-72/58 poplar plantation, Scientia Silvae Sinicae, 26(1), 22-29, 1990 (in Chinese).
- Xu, J.H., Wang, M.L., Huang, Q.F., and Gong, S.F.: Aboveground biomass model of *Quercus acutissima* natural forest, Anhui Forestry Science and Technology, 37(4), 3-6, 2011a (in Chinese).
- Xu, J.W., Li, C.R., Wang, W.D., Qiao, Y.J., Cheng, H.Y., and Wang, Y.H.: The biomass and productivity of *Pinus thunbergii* protective forests in sandy coastal area, Journal of Northeast Forestry University, 33(6), 29-32, 2005 (in Chinese).
- Xu, J.W., Ai, S.J., Han, F., Fan, Y.X., Zhao, F., Lu, S.S., and Fu, Y.: The biomass of young *Pinus taeda* plantations in sandy coastal areas, Journal of Shandong Agricultural University (Natural Science Edition), 38(2), 252-256, 2007 (in Chinese).
- Xu, W., Hu, H.B., and Zhou, C.H.: Biomass structure and distribution characteristics of *Pinus massoniana* plantation in eastern Anhui Province, Journal of Central South University of Forestry and Technology, 31(6), 111-115, 2011b

(in Chinese).

Xu, X.N., and Li, H.K.: Growth characteristics of a mixed plantation of Chinese fir and *Pinus taiwanensis*, Forest Research, 9(3), 278-283, 1996 (in Chinese).

Xu, Z.B., Li, X., Dai, H.C., Tan, Z.X., Zhang, Y.P., Guo, X.F., Peng, Y.S., and Dai, L.M.: Study on the biomass of the broadleaved Korean pine forest in Changbai Mountain, Research of Forest Ecosystem, 5, 33-47, 1985 (in Chinese).

Xu, Z.Q., Li, W.H., Liu, W.Z., and Wu, X.B.: Study on the biomass and productivity of Mongolian oak forests in northeast region of China, Chinese Journal of Eco-Agriculture, 14(3), 21-24, 2006 (in Chinese).

Xu, Z.Z., Liu, G.Y., Wang, G.H., Zhao, G.H., and Ma, C.M.: The biodiversity and biomass in *Larix principis-rupprechtii* plantation community in Yanshan Mountains, Forest Resources Management, (2), 43-49, 2010 (in Chinese).

Xuan, Z.L., Zhang, Q.C., Ge, L.L., He, H.J., Xu, M.M., and Xu, W.S.: Biomass structure and distribution of Korean larch plantations, Forest Resources Management, (1), 53-57, 2013 (in Chinese).

Xue, P.: Growth and biomass of 6-year-old *Eucalyptus urophylla* plantation in Leizhou Forestry Bureau, Eucalypt Science and Technology, 26(1), 18-21, 2009 (in Chinese).

Xue, X.K., and Sheng, W.T.: Study on the biomass of *Fokienia hodginsii* plantation in Zhuting Town, Hunan Province, Forest Science and Technology, (4), 16-19, 1993 (in Chinese).

Xue, L., Jacobs, D.F., Zeng, S.C., Yang, Z.Y., Guo, S.H., and Liu, B.: Relationship between aboveground biomass and stand density index in *Populus × euramericana* stands, Forestry, 85, 611-619, 2012.

Yan, R.F., and Zhu, S.Q.: Comparison of biomass estimates of *Pinus massoniana* plantation, Collection of Guizhou Agricultural College, (4), 101-105, 1984 (in Chinese).

Yan, H.P., Li, H., and Zhang, J.S.: Study on the biomass of *Acer truncatum* forest, Journal of Beijing Forestry University, 19(S2), 108-112, 1997 (in Chinese).

Yan, J.F., Guan, Q.W., Deng, S.Q., Yu, S.Q., and Shan, X.D.: The biomass and productivity of *Platycladus orientalis*

- plantation in Yunlong Mountain of Xuzhou, China Forestry Science and Technology, 23(2), 48-50, 2009 (in Chinese).
- Yan, W.X., Su, Y.M., Liu, X.L., and Liang, H.C.: The biomass and productivity of *Picea likiangensis* var. *balfouriana* plantation, Journal of Sichuan Forestry Science and Technology, 12(4), 17-22, 1991 (in Chinese).
- Yang, L.: The biomass model of *Populus tomentosa* plantation in Daxing District, Beijing, Hebei Journal of Forestry and Orchard Research, 26(4), 345-348, 2011 (in Chinese).
- Yang, T.: The biomass and root distribution of *Pinus massoniana* and *Quercus acutissima* natural secondary mixed forest, Journal of Xinyang Agricultural College, 14(4), 4-6, 9, 2004 (in Chinese).
- Yang, X.: The biomass and productivity of the intercropping ecosystem with paulownia (*Paulownia elongata*) and crops, Acta Agriculturae Universitatis Henanensis, 20(4), 485-509, 1986 (in Chinese).
- Yang, Z.Q.: Biomass distribution and productivity characteristics of forests in Karst desertification area, Guangdong Agricultural Sciences, (7), 16-163, 2013 (in Chinese).
- Yang, D., and Yang, X.Q.: Study on the biomass and productivity of *Pinus tabulaeformis* plantation in Wufeng Mountain, Wudu County, Gansu Province, Journal of Northwest Normal University (Natural Science Edition), 40(1), 70-75, 2004 (in Chinese).
- Yang, H.K., and Cheng, S.Z.: Study on the biomass of a karst forest community in Jizi Mountain, Maolan County, Guizhou Province, Acta Ecologica Sinica, 11(4), 307-312, 1991 (in Chinese).
- Yang, Q.P., Li, M.G., Wang, B.S., Li, R.W., and Wang, C.W.: Dynamics of the biomass and net primary productivity in succession of south subtropical forests in Southwest Guangdong, Chinese Journal of Applied Ecology, 14(12), 2136-2140, 2003a (in Chinese).
- Yang, Q.P., Wang, B., Guo, Q.R., Zhao, G.D., Fang, K., and Liu, Y.Q.: Effects of *Phyllostachys edulis* expansion on carbon storage of evergreen broadleaved forest in Dagang Mountain, Jiangxi, Acta Agriculturae Universitatis Jiangxiensis, 33(3), 529-536, 2011 (in Chinese).



- Yang, R., Deng, Z.J., Qin, M.C., and Dai, P.Y.: Study on the biomass of *Cupressus funebris* plantation in the hilly region, the middle of Sichuan Province, Sichuan Forestry Science and Technology, 8(1), 21-24, 1987 (in Chinese).
- Yang, T.H., Song, K., Da, L.J., Li, X.P., and Wu, J.P.: The biomass and aboveground net primary productivity of *Schima superba*-*Castanopsis carlesii* forests in east China, *Science China Life Science*, 40(7), 610-619, 2010a (in Chinese).
- Yang, X., Wu, G., Huang, D.M., and Yang, C.Q.: Quantitative study on biomass accumulation of *Paulownia elongate*, Chinese Journal of Applied Ecology, 10(2), 143-146, 1999 (in Chinese).
- Yang, X.M., Cheng, J.M., and Meng, L.: Carbon storage and density features of *Pinus tabuliformis* f. *shekannesis* natural forest in the Loess Plateau, Science of Soil and Water Conservation, 8(2), 41-45, 58, 2010b (in Chinese).
- Yang, Y., Ran, F., Wang, G.X., Zhu, W.Z., Yang, Y., and Zhou, P.: Biomass model and carbon storage of *Pinus yunnanensis* on Tibet Plateau of China, Chinese Journal of Ecology, 32(7), 1674-1682, 2013 (in Chinese).
- Yang, Y.L., Gao, J.B., Cao, F., Lu, D.B., Zhao, Q.X., Wu, Y.X., and Lu, Z.M.: Effect of thinning on the growth of *Larix gmelinii*, Journal of Jilin Forestry Science and Technology, 32(5), 21-24, 2003b (in Chinese).
- Yang, Z.W., Tan, F.L., Xiao, X.X., Chen, L.S., and Zhuo, K.F.: Study on the biomass of *Fokienia hodginsii* plantation, Scientia Silvae Sinicae, 36(S1), 120-124, 2000 (in Chinese).
- Yao, D.H., and He, Y.J.: Study on the biomass and productivity of *Pinus massoniana* air-seeding forests, Journal of Hunan Environmental-Biological Polytechnic, 7(1), 23-27, 2001 (in Chinese).
- Yao, D.H., and Li, Z.H.: Study on the biomass dynamics of *Cryptomeria japonica* plantation, Scientia Silvae Sinicae, 33(S2), 203-207, 1997 (in Chinese).
- Yao, D.H., Yang, M.S., and Li, Z.H.: Effect of stand density on the biomass and productivity of *Eucalyptus grandis* × *E. urophylla* plantation, Journal of Central South Forestry University, 20(3), 20-23, 2000 (in Chinese).
- Yao, G.Q., Chi, G.Q., Dong, Z.Q., and Guo, D.W.: The productivity of three artificial Korean pine stands in the mountainous areas of Liaoning Province, Journal of Northeast Forestry University, 14(4), 42-47, 1986 (in

Chinese).

Yao, Y.J., Kang, W.X., and Tian, D.L.: Study on the biomass and productivity of *Cinnamomum camphora* plantation, Journal of Central South Forestry University, 23(1), 1-5, 2003 (in Chinese).

Ye, W.H.: Study on Tree Architecture of Three Hardwoods. Heilongjiang Science and Technology Press, Harbin, China, 84-88, 1995 (in Chinese).

Ye, W.P.: Structure dynamics and vegetation productivity in the processes of ecological restoration in red earth of Lijiang Valley, Thesis for Master's Degree, Guangxi Normal University, Guilin, China, 41pp., 2005 (in Chinese).

Ye, J.Z., and Jiang, Z.L.: Study on the biomass and its distribution of *Cunninghamia lanceolata* plantations in the hilly regions of the south Jiangsu Province, Acta Ecologica Sinica, 3(1), 7-14, 1983 (in Chinese).

Ye, J.Z., Jiang, Z.L., Zhou, B.L., Han, F.Q., and Chen, S.B.: Annual dynamics of the biomass of Chinese fir forests in Yangkou Forest Farm, Fujian Province, Journal of Nanjing Institute of Forestry, (4), 1-9, 1984 (in Chinese).

Ye, S.M., Zheng, X.X., Xie, W.D., and Zhao, L.J.: Sprout regeneration and plant regeneration influences on the yield of *Eucalyptus urophylla* × *E. grandis* plantation, Journal of Nanjing Forestry University (Natural Science Edition), 31(3), 43-46, 2007 (in Chinese).

Ye, S.M., Zheng, X.X., Yang, M., Xie, W.D., Zhao, L.J., and Liang, H.W.: Biomass and productivity of stratified mixed stands of *Eucalyptus urophylla* and *Acacia mangium*, Journal of Beijing Forestry University, 30(3), 37-43, 2008 (in Chinese).

Ye, W.P., Li, X.K., Lyu, S.H., Ou, Z.L., Pan, Z., Su, Z.M., and Xie, X.: Dynamics of vegetation structure and biomass in the processes of ecological restoration in the red soil region of Lijiang Valley, Journal of Ecology and Rural Environment, 22(1), 5-10, 2006 (in Chinese).

Yi, A.Y.: Biomass and productivity of mixed plantation of *Cryptomeria japonica* and *Cunninghamia lanceolata*, Sichuan Forestry Exploration and Design, (3), 50-52, 59, 1998 (in Chinese).

Yi, W.M., Zhang, Z.P., Ding, M.M., and Wang, B.S.: Biomass and efficiency of radiation utilization in *Erythrophloeum*

- fordii* community, *Acta Ecologica Sinica*, 20(2), 397-403, 2000 (in Chinese).
- You, W.Z., Huo, C.F., Xing, Z.K., Zhao, G., Zhang, H.D., Wei, W.J., and Yan, T.W.: Biomass and net primary productivity of *Larix olgensis* plantation in Bingla Mountains, northeast China, *Journal of Shenyang Agricultural University*, 42(5), 565-569, 2011 (in Chinese).
- Yu, M.J.: Dynamics of an evergreen broadleaved forest dominated by *Cyclobalanopsis glauca* in southeast China, *Scientia Silvae Sinicae*, 35(6), 42-51, 1999 (in Chinese).
- Yu, B., Zhang, Q.L., Wang, L.M., and Wu, J: Characteristics of biomass and productivity in *Larix gmelinii* natural forests with different stand structures, *Journal of Zhejiang Agriculture and Forestry University*, 28(1), 52-58, 2011 (in Chinese).
- Yu, X.T., Chen, C.J., and Lin, S.Z.: Preliminary study on the biomass of Chinese fir plantation in Fujian Province, *Fujian College of Forestry*, Nanping, China, 46-68, 1979 (in Chinese).
- Yu, Y.F., Song, T.Q., Zeng, F.P., Peng, W.X., Wen, Y.G., Huang, C.B., Wu, Q.B., Zeng, S.X., and Yu, Y.: Dynamic changes of biomass and its allocation in *Cunninghamia lanceolata* plantations of different stand ages, *Chinese Journal of Ecology*, 32(7):1660-1666, 2013 (in Chinese).
- Yuan, C.M., Lang, N.J., Meng, G.T., Fang, X.J., Li, G.X., and Wen, S.L.: Community structure characteristics and biological productivity of *Acacia dealbata* protective plantation in Toutang mountainous area, *Yunnan Forestry Science and Technology*, (2), 24-27, 1998 (in Chinese).
- Yuan, C.M., Lang, N.J., Meng, G.T., Fang, X.J., Li, G.X., and Wen, S.L.: The structural feature and biomass of soil-water conservative plantation of Armand pine in the upper reach of the Yangtze River, *Journal of Northeast Forestry University*, 30(3), 5-7, 2002 (in Chinese).
- Zeng, X.P., Peng, S.L., and Zhao, P.: Measurement of respiration amount in artificial *Acacia mangium* forest in a low subtropical hill forest region of Guangdong, *Acta Phytocologica Sinica*, 24(4), 420-424, 2000 (in Chinese).
- Zeng, X.P., Cai, X.A., Zhao, P., Rao, X.Q., Zou, B., Zhou, L.X., Lin, Y.B., and Fu, S.L.: Biomass and net primary

- productivity of three plantation communities in hilly land of lower subtropical China, Journal of Beijing Forestry University, 30(6), 148-152, 2008 (in Chinese).
- Zhai, B.G., Song, C.H., Zhang, H.D., and Wang, W.X.: Study on the biomass and productivity of *Pinus tabuliformis* plantation at a permanent plot in Taiyue Forest Region, Shanxi Province, Journal of Beijing Forestry University, 14(S1), 156-163, 1992 (in Chinese).
- Zhang, B.L.: Study on the biomass and productivity of *Quercus liaotungensis* stands in Ziwuling Forest Region, Shaanxi Province, Journal of Northwestern College of Forestry, 5(1), 1-7, 1990 (in Chinese).
- Zhang, H.T.: Preliminary study on the biomass of *Pinus sylvestris* var. *sylvestriformis* forest, Jilin Forestry Science and Technology, (3), 5-7, 1992 (in Chinese).
- Zhang, J.D.: Relationship between initial stand density and the biomass of *Pinus taiwanensis* plantations, Forest Science and Technology, (1), 7-10, 2000 (in Chinese).
- Zhang, J.F.: Determination of the biomass of Chinese white poplar plantation in Daxing District, Beijing, Contemporary Eco-Agriculture, (3-4), 54-57, 2010a (in Chinese).
- Zhang, S.L.: Study on forest biomass and carbon storage estimation of *Cunninghamia lanceolata* in Minjiang Watershed based on RS and GIS, Thesis for Master's Degree, Fujian Agriculture and Forestry University, Fuzhou, China, 84pp., 2008 (in Chinese).
- Zhang, W.Z.: The biomass and productivity of *Pinus elliottii* plantation in Pingnan County, Forest Investigation Design, (2), 11-16, 2010b (in Chinese).
- Zhang, Z.J.: Study on spatial characteristics of *Pinus massoniana* biomass and root distribution in an acid rain area, Chongqing, Thesis for Master's Degree, Agricultural University of Hebei, Baoding, China, 50pp., 2006 (in Chinese).
- Zhang, Z.Q.: The standing crop of *Pinus koraiensis* plantations in the eastern Heilongjiang Province, Journal of Northeastern Forestry Institute, (4): 85-98, 1981 (in Chinese).

- Zhang, B.L., and Chen, C.G.: Biomass and productivity of *Robinia pseudoacacia* plantation in Hongxing Forest Farm of Changwu County, Shaanxi Province, Shaanxi Forest Science and Technology, (3), 13-17, 1992 (in Chinese).
- Zhang, C.L., and Zhou, X.F.: Biomass of a natural secondary birch stand, in: Long-term Located Research on Forest Ecosystems, Volume 1, Zhou, X.F., Wang, Y.H., Zhao, H.X., eds., Northeast Forestry University Press, Harbin, China, 428-435, 1991 (in Chinese).
- Zhang, F., and Shangguan, T.L.: Synecological features and biomass of *Larix principis-rupprechtii* forest in Guandi Mountain, Shanxi Province, Journal of Shanxi University (Natural Science Edition), 15(1), 72-77, 1992 (in Chinese).
- Zhang, J.X., and Yuan, Y.Z.: A study on the biomass and productivity of *Pinus fenzeliana* forest in Hainan, Acta Phytocologica et Geobotanica Sinica, 12(1), 63-69, 1988 (in Chinese).
- Zhang, S.Y., and Pan, C.D.: The compatible biomass model of *Picea schrenkiana* young plantation, Journal of Fujian College of Forestry, 22(3), 201-204, 2002 (in Chinese).
- Zhang, G.B., Li, X.Q., She, X.S., Hu, C.Q., and Hu, G.H.: Biomass characteristics of dominant tree species (group) in Lingnan Forest Farm, Anhui Province, Scientia Silvae Sinicae, 48(5), 136-140, 2012 (in Chinese).
- Zhang, J.G., Li, Y.Q., Ji, J.S., and Li, R.C.: Effect of fertilization on the biomass of young Chinese fir plantation, Forest Research, 9(S), 41-47, 1996a (in Chinese).
- Zhang, J.W., Chen, C.Y., Deng, S.J., and Feng, Z.W.: Comparison of the mathematical patterns for estimating the standing crop of *Cunninghamia lanceolata* plantation, Journal of Northeastern Forestry Institute, 12(4), 1-6, 1984 (in Chinese).
- Zhang, J.X., Zhou, W., Li, Y., Luo, W., and Xie, C.M.: The biomass of Chinese corktree plantations, Non-wood Forest Research, 8(1), 35-40, 1990 (in Chinese).
- Zhang, J.Z., Zhou, L.F., Huang, S.Q., and Chen, J.: The growth and productivity of *Acacia dealbata* plantation, East China Forest Management, 8(3), 35-38, 1994a (in Chinese).

- Zhang, L., Luo, T.X., Deng, K.M., Dai, Q., Huang, Y., Jiang, Z.F., Tao, M.Y., and Zeng, K.Y.: Biomass and net primary productivity of secondary evergreen broadleaved forest in Huangmian Forest Farm, Guangxi, Chinese Journal of Applied Ecology, 15(11), 2029-2033, 2004a (in Chinese).
- Zhang, L., Huang, Y., Luo, T.X., Dai, Q., and Deng, K.M.: Age effects on stand biomass allocations to different components: A case study of *Cunninghamia lanceolata* plantations and *Pinus massoniana* plantations, Journal of the Graduate School of the Chinese Academy of Sciences, 22(2), 170-178, 2005 (in Chinese).
- Zhang, Q., Fan, S.H., Liu, G.L., Feng, H.X., Zong, Y.C., and Fei, B.H.: A study on biomass and productivity of *Populus × euramericana* cv. ‘San Martino’ (I-72/58) plantation on beach land of Yangtze River, Forest Research, 21(4), 542-547, 2008a (in Chinese).
- Zhang, S.G., Yao, Y.T., Qi, L.W., and Xue, J.J.: The biomass and nutrient element (Cu and Mo) distribution of *Larix principis-rupprechtii* plantation, Forest Science and Technology, (4), 19-21, 1999a (in Chinese).
- Zhang, S.G., Liu, J., Huang, K.Y., Liang, R.L., and Lan, X.: Biomass and distribution patterns of *Pinus massoniana* plantation in northwest Guangxi, Guangxi Forestry Science, 39(4), 189-192, 219, 2010 (in Chinese).
- Zhang, S.L., Liu, J., and Yu, K.Y.: Study on compatible nonlinear stand biomass model based on SPSS, Journal of Fujian Agriculture and Forestry University (Natural Science Edition), 37(5), 496-500, 2008b (in Chinese).
- Zhang, W.H., Wang, Y.P., Kang, Y.X., and Liu, X.J.: Study on the relationship between *Larix chinensis* population’s structure and environment factors, Acta Ecologica Sinica, 24(2), 41-47, 2004b (in Chinese).
- Zhang, W.Q., Peng, S.L., Ren, H., and Peng, Z.W.: The allocation of biomass and energy in *Acacia mangium* forest, Acta Ecologica Sinica, 15(S1): 44-48, 1995 (in Chinese).
- Zhang, W.Y., Zheng, Y.S., and You, X.Z.: A study on the biomass models for organs of *Tsoongiodendron odorum*, Acta Agriculturae Universitatis Jiangxiensis, 21(3), 410-413, 1999b (in Chinese).
- Zhang, X.D., Xue, M.H., Xu, J., Wang, T., Chen, Y.F., Zhao, G.P., and Song, C.: Biomass structure of *Pinus massoniana* plantations, Journal of Anhui Agricultural College, 19(4), 268-273, 1992 (in Chinese).

- Zhang, X.D., Wu, Z.M., and Peng, Z.H.: Mathematical models of the biomass structure of *Pinus thunbergii* plantation, Journal of Biomathematics, 9(5), 60-65, 1994b (in Chinese).
- Zhang, Y.S., Wang, X.L., and Zhou, L.S.: Preliminary study on the biomass of *Pinus schrenkiana* forest, Journal of August 1st Agricultural College, (3), 19-25, 1980 (in Chinese).
- Zhang, Z.H., Li, Y., and Xie, R.G.: A preliminary study on the growth and biomass of the mixed plantation of *Magnolia officinalis* and *Cunninghamia lanceolata*, Journal of Fujian Forestry Science and Technology, 23(3), 28-31, 1996b (in Chinese).
- Zhang, Z.H., Wang, L.C., Luo, J.X., and Zheng, D.R.: Study on tree biomass models of *Pinus yunnanensis* in northwest Yunnan Province, Shandong Forestry Science and Technology, (4), 4-6, 2011 (in Chinese).
- Zhang, Z.J., Wang, Y.H., Yuan, Y.X., Li, Z.Y., Cao, L., Zhang, G.Z., Yu, P.T., and Wang, Y.: Study on the biomass and distribution of *Pinus massoniana* natural secondary forest, Journal of Agricultural University of Hebei, 29(5), 37-43, 2006 (in Chinese).
- Zhang, Z.P., Ding, M.M., Zai, G.L., Yi, W.M., and Huang, Y.J.: Biomass and net primary productivity of *Cryptocarya concinna* community in Dinghushan Nature Reserve, Ecological Science, (1), 8-11, 1991 (in Chinese).
- Zhao, L.: Study on the biomass and its allocation of *Schima superba* planted forests, Jiangxi Forestry Science and Technology, (4), 5-7, 59, 2006 (in Chinese).
- Zhao, K., and Tian, D.L.: Study on the biomass and productivity of mature Chinese fir stand in Huitong County, Journal of Central South Forestry University, 20(1), 7-13, 2000 (in Chinese).
- Zhao, P., and He, Y.J.: Stand growth and biomass of *Zanthoxylum ailanthoides*, Journal of Central South University of Forestry and Technology, 29(5), 67-71, 2009 (in Chinese).
- Zhao, T.S., and Zhang, P.C.: Comprehensive effects of tending and felling on *Pinus taiwanensis* plantation, Acta Agriculturae Universitatis Henanensis, 23(4), 409-421, 1989 (in Chinese).
- Zhao, G.L., Wang, J.X., Wang, X.Z., Shen, Y.B., and Zhou, J.C.: Nutrient element cycling and density effects of *Pinus*

- tabuliformis* plantations, Journal of Beijing Forestry University, 28(4), 39-44, 2006 (in Chinese).
- Zhao, J.M., Wu, Z.W., and Xie, S.X.: Individual growth and biomass characteristics of wild *Idesia polycarpa* in Guizhou, Guizhou Forestry Science and Technology, 40(4), 7-13, 23, 2012 (in Chinese).
- Zhao, T.S., Guang, Z.Y., Zhao, Y.M., and Liu, G.W.: Study on the biomass and productivity of *Larix kaempferi* plantation, Acta Agriculturae Universitatis Henanensis, 33(4), 350-353, 1999 (in Chinese).
- Zheng, D.H.: Comparison of biomass estimation methods of *Pinus taiwanensis* plantation, Journal of Fujian Forestry Science and Technology, 26(S), 36-39, 1999 (in Chinese).
- Zheng, H., Ouyang, Z.Y., Xu, W.H., Wang, X.K., Miao, H., Li, X.Q., and Tian, Y.X.: Variation of carbon storage by different reforestation types in the hilly red soil region of southern China, Forest Ecology and Management, 255, 1113-1121, 2008.
- Zheng, Z., Feng, Z.L., Cao, M., Liu, H.M., and Liu, L.H.: Biomass and net primary productivity of primary tropical wet seasonal rainforest in Xishuangbanna, Acta Phytoecologica Sinica, 24(2), 197-203, 2000 (in Chinese).
- Zheng, Z., Liu, H.M., and Feng, Z.L.: Biomass of tropical montane rain forest in Xishuangbanna, Southwest China, Chinese Journal of Ecology, 25(4), 347-353, 2006 (in Chinese).
- Zhong, Q.L., Zhang, Z.Y., Zhang, C.H., Zhou, H.L., and Huang, Z.Q.: The dynamic analysis of the biomass and its structure of *Machilus pauhoi*, Acta Agriculturae Universitatis Jiangxiensis, 23(4), 533-536, 2001 (in Chinese).
- Zhou, S.Q., and Huang, J.Y.: Biomass estimation models of *Larix mastersiana* plantation, Journal of Sichuan Forestry Science and Technology, 12(2), 67-69, 1991a (in Chinese).
- Zhou, S.Q., and Huang, J.Y.: A study on biomass and productivity of *Larix mastersiana* plantation in Sichuan, Acta Phytoecologica et Geobotanica Sinica, 15(1): 9-16, 1991b (in Chinese).
- Zhou, Z.X., and Xie, S.X.: The biomass and productivity of *Eucommia ulmoides* plantation, Forest Research, 7(6), 646-651, 1994.
- Zhou, G.M., Yao, J.X., Qiao, W.Y., Yang, Q.H., Zhu, G.J., and Xu, W.Y.: Biomass of Chinese fir planted forest in



- Qingyuan County of Zhejiang Province, Journal of Zhejiang Forestry College, 13(3), 235-242, 1996 (in Chinese).
- Zhou, G.Y., Zeng, Q.B., Lin, M.X., Chen, B.F., Li, Y.D., and Wu, Z.M.: Study on the biomass and nutrient allocation in *Manglietia hainanensis* plantation ecosystem at Jianfengling, Hainan Province, Forest Research, 10(5), 453-457, 1997 (in Chinese).
- Zhou, W.C., Mu, C.C., Liu, X., and Gu, W.: Carbon sink in natural swamp forest ecosystems in Xiaoxing'an Mountains, Journal of Northeast Forestry University, 40(7), 71-75, 127, 2012 (in Chinese).
- Zhou, Z.Z., Zheng, H.S., Yin, G.T., Yang, Z.J., and Chen, K.T.: Biomass equations for rubber tree in southern China, Forest Research, 8(6), 624-629, 1995 (in Chinese).
- Zhu, S.Q., and Yang, S.Y.: Preliminary study on the biomass and its distribution of *Cunninghamia lanceolata* plantation, Guizhou Agricultural College, Guiyang, 14pp., 1979 (in Chinese).
- Zhu, B.L., Li, Z.H., and Chen, S.X.: Effect of stand density on the biomass and productivity of *Eucalyptus urophylla* × *E. grandis* plantation, Journal of Hunan Environmental-Biological Polytechnic, 13(4), 11-14, 2007 (in Chinese).
- Zhu, S.Q., Wei, L.M., Chen, Z.R., and Zhang, C.G.: A preliminary study on biomass components of karst forest in Maolan of Guizhou Province, China, Acta Phytocologica Sinica, 19(4), 358-367, 1995 (in Chinese).
- Zhu, X.W., Xiao, Y., and Cai, W.C.: A preliminary study on the biomass of *Populus davidiana* natural forest, Science and Technology of Qinghai Agriculture and Forestry, (1), 30-34, 1988 (in Chinese).
- Zhuang, H.L., Becuwe, X., Xiao, C.B., Wang, Y.H., Wang, H., Yin, B., and Liu, C.J.: Allometric equation-based estimation of biomass carbon sequestration in *Metasequoia glyptostroboides* plantations in Chongming Island, Shanghai, Journal of Shanghai Jiaotong University (Agricultural Science Edition), 29(2), 48-55, 2012 (in Chinese).
- Zou, C.J., Bu, J., and Xu, W.D.: Biomass and productivity of *Pinus sylvestris* plantation, Chinese Journal of Applied Ecology, 6(2), 123-127, 1995 (in Chinese).

1   **Tables**

2   **Table 1: Summary of variable information in the dataset, which is available at <https://doi.pangaea.de/10.1594/PANGAEA.895244>.**

| Variable                | Description                                                                                                                                                                                                                                                                                                                                                    | Data origin                      | Unit     | Type    |
|-------------------------|----------------------------------------------------------------------------------------------------------------------------------------------------------------------------------------------------------------------------------------------------------------------------------------------------------------------------------------------------------------|----------------------------------|----------|---------|
| <b>1. General sheet</b> |                                                                                                                                                                                                                                                                                                                                                                |                                  |          |         |
| ID                      | Identification number of each study.                                                                                                                                                                                                                                                                                                                           | Author defined                   | Unitless | Integer |
| Province                | Province location of study site.                                                                                                                                                                                                                                                                                                                               | Original studies                 | Unitless | String  |
| Study site              | Locality name of study site.                                                                                                                                                                                                                                                                                                                                   | Original studies                 | Unitless | String  |
| Latitude                | Latitudes of study sites are either directly from original studies, or are extracted from Google Earth.                                                                                                                                                                                                                                                        | Original studies or Google Earth | °        | Float   |
| Longitude               | Longitudes of study sites are either directly from original studies, or are extracted from Google Earth.                                                                                                                                                                                                                                                       | Original studies or Google Earth | °        | Float   |
| Altitude                | Altitudes of study sites are either directly from original studies, or are extracted from Google Earth.                                                                                                                                                                                                                                                        | Original studies or Google Earth | m        | Integer |
| MAT                     | Mean annual temperatures of study sites are either directly from original studies, or are extracted from a 30 arc-seconds resolution global climate database WorldClim version 1.4.                                                                                                                                                                            | Original studies or WorldClim    | °C       | Float   |
| MAP                     | Mean annual precipitations of study sites are either directly from original studies, or are extracted from WorldClim version 1.4.                                                                                                                                                                                                                              | Original studies or WorldClim    | mm       | Float   |
| Forest type             | Forest community characterized by the same tree genera, or if not genera, by ecological similarities (e.g. life form and biotope).                                                                                                                                                                                                                             | Original studies                 | Unitless | String  |
| Dominant species        | Dominant tree species of a forest type. In some forest types, there are two or more co-dominant tree species, and then the first four co-dominant species are listed at most.                                                                                                                                                                                  | Original studies                 | Unitless | String  |
| Stand origin            | Forests are classified by stand origin into natural and planted forests.                                                                                                                                                                                                                                                                                       | Original studies                 | Unitless | String  |
| Stand age               | The age of a natural forest is defined as age since germination, and the age of a planted forest is done as age since planting. Whether discrete ages, age ranges or age classes can be entered into our dataset is determined by the original studies. Discrete ages or age ranges are entered when equations were specific to ages or age ranges in original | Original studies                 | year     | Float   |

| Variable                 | Description                                                                                                                                                                                                                                                                                                                                                                                                                                  | Data origin      | Unit     | Type    |
|--------------------------|----------------------------------------------------------------------------------------------------------------------------------------------------------------------------------------------------------------------------------------------------------------------------------------------------------------------------------------------------------------------------------------------------------------------------------------------|------------------|----------|---------|
|                          | studies, otherwise age classes (young, middle-aged, premature, mature and overmature) are given according to stand descriptions. The categorization of age classes is listed in Appendix A.                                                                                                                                                                                                                                                  |                  |          |         |
| Tree spacing             | The number of trees per unit area. Tree spacings are given as mean values or ranges.                                                                                                                                                                                                                                                                                                                                                         | Original studies | trees/ha | Integer |
| Miscellaneous            | Other information not mentioned in front columns such as site index and human disturbances (e.g. fertilization and selective logging), if available.                                                                                                                                                                                                                                                                                         | Original studies | Unitless | String  |
| Sources                  | Source of the data.                                                                                                                                                                                                                                                                                                                                                                                                                          | Original studies | Unitless | String  |
| <b>2. Equation sheet</b> |                                                                                                                                                                                                                                                                                                                                                                                                                                              |                  |          |         |
| ID                       | Identification number of each study, the same as ID in General sheet. The same ID indicates that the equations come from the same study.                                                                                                                                                                                                                                                                                                     | Author defined   | Unitless | Integer |
| Equation number          | Identification number of each equation within a study.                                                                                                                                                                                                                                                                                                                                                                                       | Author defined   | Unitless | Integer |
| Tree species (group)     | Tree species that biomass equations are developed for. Species names are checked with online Flora of China ( <a href="http://frps.iplant.cn/">http://frps.iplant.cn/</a> ). When equations are developed for mixed species, species name is specified as either a particular tree group (e.g., deciduous broadleaved trees, and a certain diameter-class mixed species) or ‘generalized’ according to the descriptions in original studies. | Original studies | Unitless | String  |
| Tree component           | A tree component divided in a certain way. $\Phi$ , $s$ and $d$ denote root diameter, excavation area and excavation depth, respectively.                                                                                                                                                                                                                                                                                                    | Original studies | Unitless | String  |
| Predictor variable       | One or more dendrometric variables, i.e., tree diameter in cm and height in m. $D$ and $H$ are diameter at breast height (1.3 m above soil surface) and tree height, and $D_c$ is tree diameter at other heights (e.g., 0 m, 0.2 m, or 0.3 m) rather than breast height.                                                                                                                                                                     | Original studies | cm; m    | String  |
| Equation form            | It is used to develop a quantitative relationship between a biomass component ( $W$ in kg) and one or more predictor variables. When multiple arithmetic operators are combined                                                                                                                                                                                                                                                              | Original studies | Unitless | String  |

| Variable                   | Description                                                                                                                                                                                                                                                                                                                                                                                                                                                                                                                                                                                                                                                                                                                            | Data origin                                                                                    | Unit                                         | Type                               |
|----------------------------|----------------------------------------------------------------------------------------------------------------------------------------------------------------------------------------------------------------------------------------------------------------------------------------------------------------------------------------------------------------------------------------------------------------------------------------------------------------------------------------------------------------------------------------------------------------------------------------------------------------------------------------------------------------------------------------------------------------------------------------|------------------------------------------------------------------------------------------------|----------------------------------------------|------------------------------------|
|                            | in an equation, the order of operator precedence from highest level to lowest level is as follows: parentheses; exponentiation; multiplication and division; addition and subtraction. Within each precedence level, operators have equal precedence and are evaluated from left to right. In addition, <i>ln</i> denotes natural logarithm, and <i>lg</i> does 10-based logarithm.                                                                                                                                                                                                                                                                                                                                                    |                                                                                                |                                              |                                    |
| Equation coefficients      | Equation coefficients consist of values of parameters Coeff. <i>a</i> , Coeff. <i>b</i> , Coeff. <i>c</i> and Coeff. <i>d</i> , but not all four parameters are used in equations.                                                                                                                                                                                                                                                                                                                                                                                                                                                                                                                                                     | Original studies                                                                               | Unitless                                     | Float                              |
| Goodness-of-fit statistics | Goodness-of-fit statistics consist of <i>n</i> , $R^2$ , <i>R</i> and <i>CF</i> :<br>(1) <i>n</i> : The number of harvested trees for developing biomass equations, although it is not always available in studies.<br>(2) $R^2$ : Coefficient of determination, a measure of goodness-of-fit.<br>(3) <i>R</i> : Correlation coefficient, another measure of goodness-of-fit.<br>(4) <i>CF</i> : Correction factor, it is for a log-linearized equation to correct the systematic bias in biomass estimates introduced by log-transformation, if available. Baskerville's <i>CF</i> (Baskerville, 1972) and Snowdon's <i>CF</i> (Snowdon, 1991) were employed by original studies, where the latter is marked with 'λ' in our dataset. | Original studies<br>Original studies<br>Original studies<br>Original studies                   | Unitless<br>Unitless<br>Unitless<br>Unitless | Integer<br>Float<br>Float<br>Float |
| Applicable ranges          | Applicable ranges of equations consist of three parts:<br>(1) Method: Method for determining value ranges (minimum, maximum) of predictor variables, whose descriptions are given in Table 2.<br>(2) Diameter: Diameter ranges (minimum, maximum) from original studies or estimated by using determination methods in Table 2.<br>(3) Height: If height is used as a predictor variable, height ranges (minimum, maximum) from original studies or estimated by using determination methods in Table 2.                                                                                                                                                                                                                               | Author defined<br>Original studies or author estimated<br>Original studies or author estimated | Unitless<br>cm<br>m                          | String<br>Float<br>Float           |

1 **Table 2: Methods for determining applicable ranges of biomass equations \***

| Method | Description                                                                                                                                                                                                                                                                                                                                                                                                                       |
|--------|-----------------------------------------------------------------------------------------------------------------------------------------------------------------------------------------------------------------------------------------------------------------------------------------------------------------------------------------------------------------------------------------------------------------------------------|
| I      | Original studies presented tree diameter and height ranges (minimum, maximum) of harvested trees in the form of text, tables or figures. For <b>texts and tables</b> , applicable ranges (diameter and height ranges) of biomass equations are determined directly, while for figures (e.g. biomass-diameter relationship and height-diameter relationship), they are extracted by using software GetData Graph Digitizer v.2.24. |
| II     | When stand structures (or ranges) of diameter and height are available in original studies, they are considered as applicable ranges, although they may exceed actual ranges for equation building.                                                                                                                                                                                                                               |
| III    | When mean and standard deviation (SD) of tree diameter and height are available, applicable ranges are estimated as (mean-2SD, mean+2SD), nearly covering 95% of normal stand distributions of tree diameter and height.                                                                                                                                                                                                          |
| IV     | When only mean values of tree diameter were provided without other statistics (e.g. SD), a rule of thumb is that diameter ranges are roughly estimated as (mean $\times$ 0.5, mean $\times$ 1.5).                                                                                                                                                                                                                                 |
| V      | When the above situations do not occur, applicable ranges of biomass equations are roughly estimated by using ones under similar phylogeny, age and growing environments. However, applicable ranges of some equations are not still obtained because of limited data.                                                                                                                                                            |

2 \* According to the amount and reliability of information in original studies, five methods are employed in priority order: I >  
3 II > III > IV > V. Concerning those biomass equations with diameter and height as predictor variables, when only diameter  
4 ranges are determined, height ranges are estimated from: (1) biomass ranges, which are from original studies or could be  
5 calculated by using diameter-based equations if equations based on both diameter and height are available; or (2)  
6 height-diameter relationships (height-diameter curves or height/diameter ratios), which are from original studies, or are  
7 developed by using raw data of diameter and height within original studies or by using mean diameter and height data from  
8 Luo et al. (2013) (**Appendix B**).

1 **Figures**

2

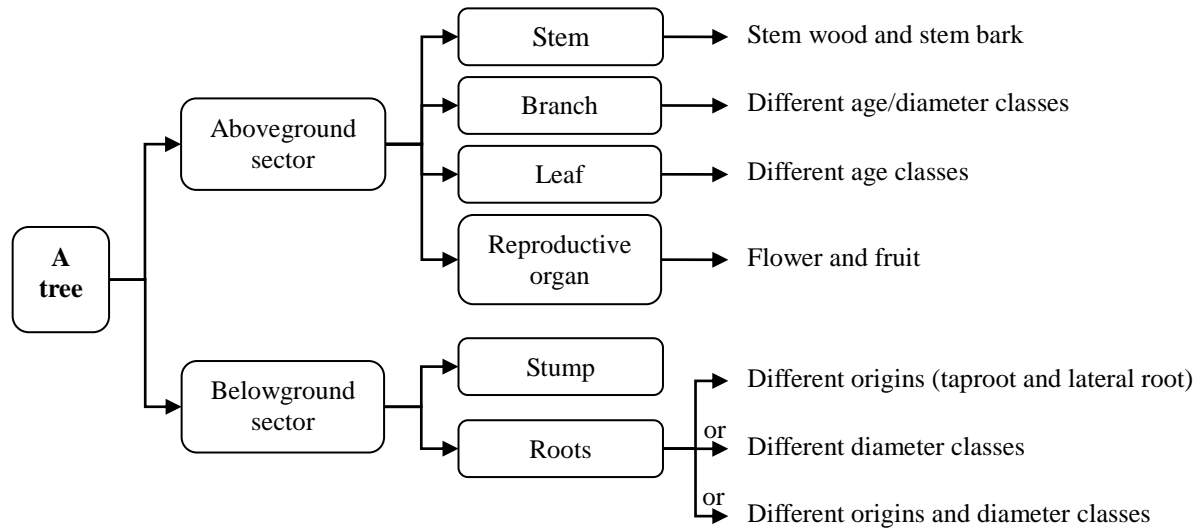

3

4 **Figure 1: The division of tree components. A tree can be divided into (1) aboveground sector above the soil surface and (2)**

5 **belowground sector, which are often subdivided into finer components.**

6

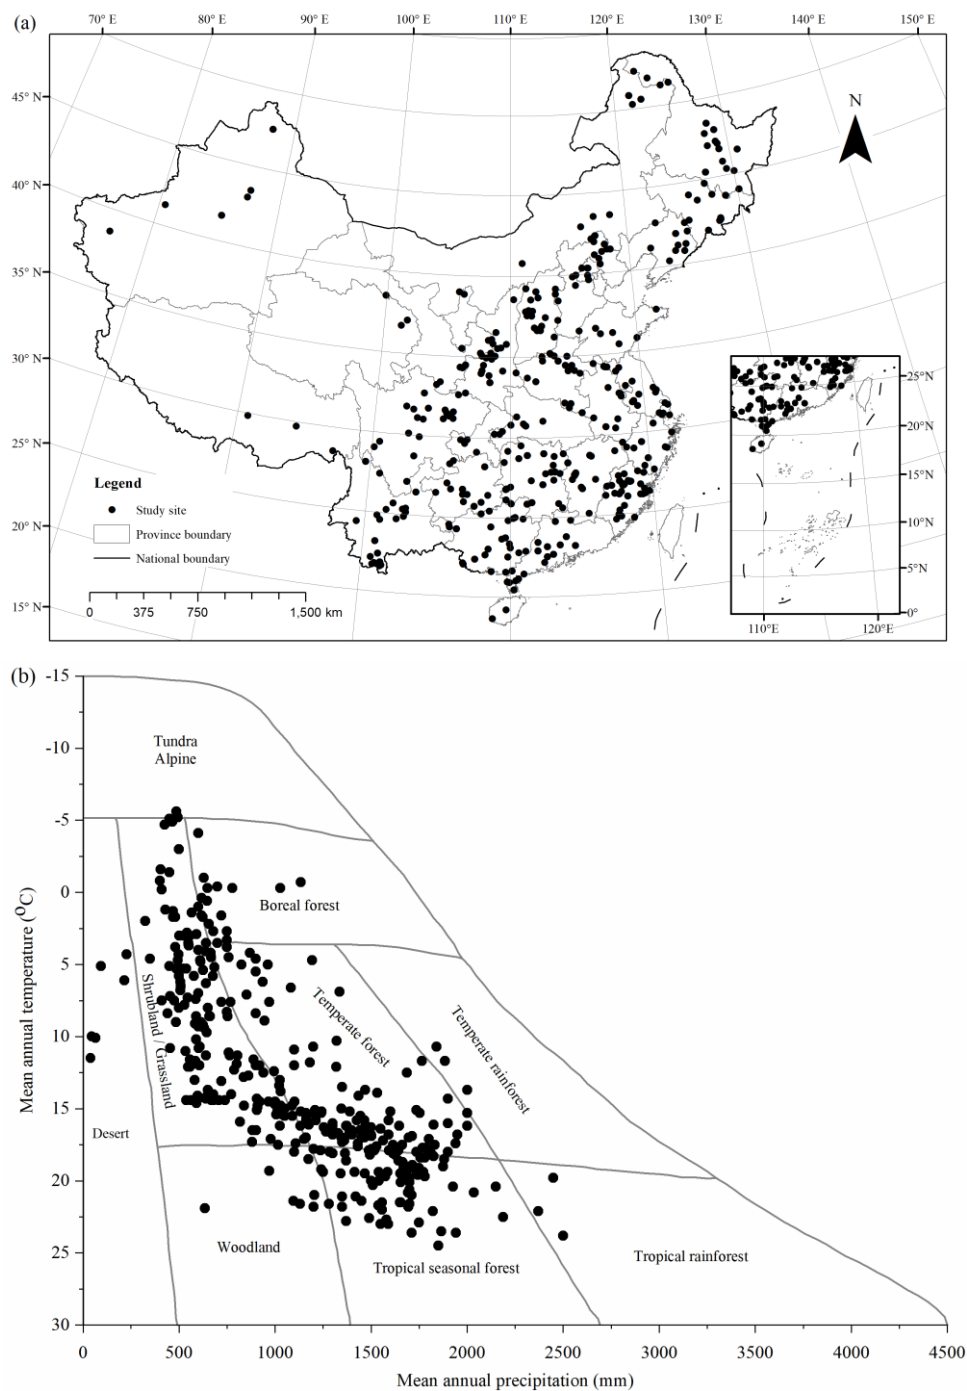

1 **Figure 2:** Spatial distribution of study sites: (a) geographical coverage and (b) climate space. Mean annual temperature and  
2 precipitation of sites are superimposed upon Whittaker's climate-biome diagram (Whittaker, 1975).

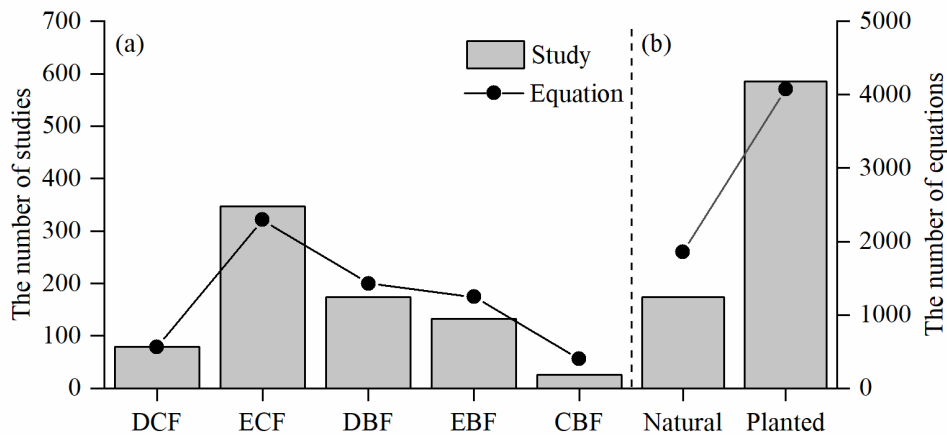

**Figure 3:** Distribution of compiled studies and biomass equations by (a) forest type and (b) stand origin. Forests are categorized by forest type into deciduous coniferous forest (DCF), evergreen coniferous forest (ECF), deciduous broadleaved forest (DBF), evergreen broadleaved forest (EBF), and coniferous and broadleaved mixed forest (CBF). and by stand origin into natural forest and planted forest.

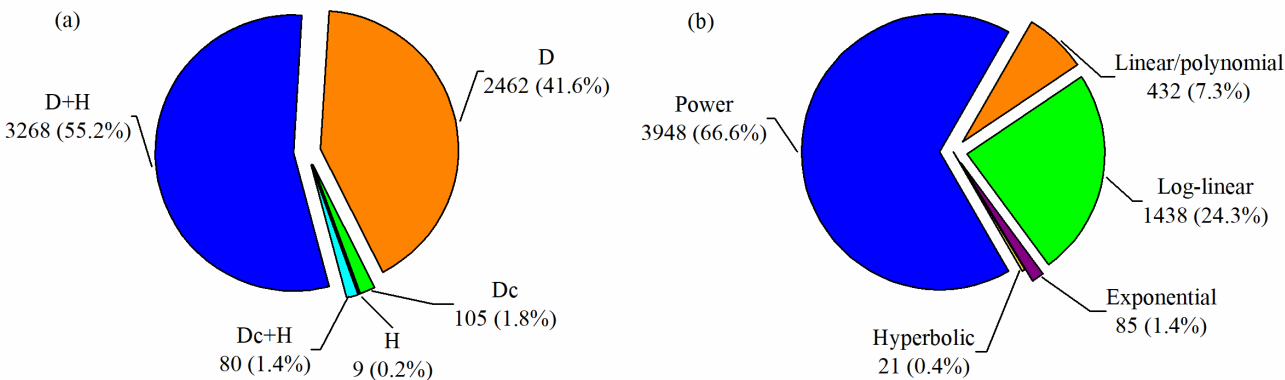

**Figure 4:** Distribution of biomass equations by (a) predictor variable and (b) equation form. D and H are diameter at breast height (1.3 m) and height, and Dc is tree diameter at other heights (e.g. 0 m, 0.2 m, and 0.3 m) rather than breast height. Equation forms used in original studies are categorized into power equation, log-linear equation, linear/polynomial equation, exponential equation and hyperbolic equation (Appendix E).



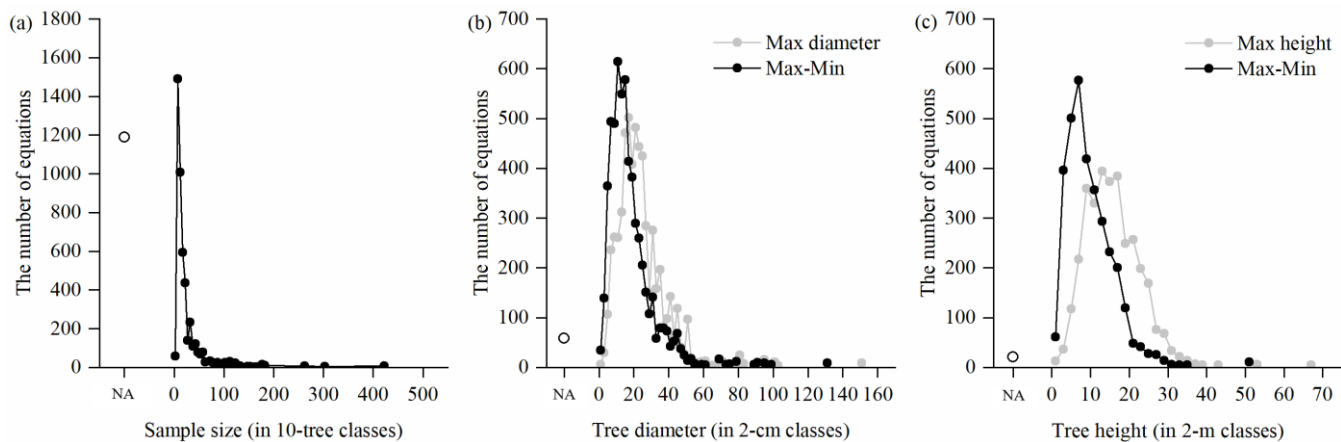

**Figure 5:** Distribution of sample size and applicable range of biomass equations: (a) sample size, (b) tree diameter and (c) tree height. The dots represent the number of equations within each class. If sample sizes and applicable ranges are not available, they are indicated by 'NA'.

1 **Appendix A: Categorization of age class by dominant tree species, growing region and stand origin \***

| Dominant tree species                                                                   | Region † | Origin ‡ | Age class (year) |             |           |         |            |
|-----------------------------------------------------------------------------------------|----------|----------|------------------|-------------|-----------|---------|------------|
|                                                                                         |          |          | Young            | Middle-aged | Premature | Mature  | Overmature |
| <i>Picea</i> sp., <i>Pinus koraiensis</i> ,                                             | N        | NF       | ≤60              | 61-100      | 101-120   | 121-160 | ≥161       |
| <i>Taxus</i> sp., <i>Tsuga</i> sp.                                                      | N        | PF       | ≤40              | 41-60       | 61-80     | 81-120  | ≥121       |
|                                                                                         | S        | NF       | ≤40              | 41-60       | 61-80     | 81-120  | ≥121       |
|                                                                                         | S        | PF       | ≤30              | 31-50       | 51-60     | 61-80   | ≥81        |
| <i>Cupressus</i> sp.                                                                    | N        | NF       | ≤60              | 61-100      | 101-120   | 121-160 | ≥161       |
|                                                                                         | N        | PF       | ≤30              | 31-50       | 51-60     | 61-80   | ≥81        |
|                                                                                         | S        | NF       | ≤40              | 41-60       | 61-80     | 81-120  | ≥121       |
|                                                                                         | S        | PF       | ≤30              | 31-50       | 51-60     | 61-80   | ≥81        |
| <i>Abies</i> sp., <i>Larix</i> sp., <i>Pinus densiflora</i> , <i>P. sylvestris</i> var. | N        | NF       | ≤40              | 41-80       | 81-100    | 101-140 | ≥141       |
| <i>mongolica</i> , <i>P. thunbergii</i>                                                 | N        | PF       | ≤20              | 21-30       | 31-40     | 41-60   | ≥61        |
|                                                                                         | S        | NF       | ≤40              | 41-60       | 61-80     | 81-120  | ≥121       |
|                                                                                         | S        | PF       | ≤20              | 21-30       | 31-40     | 41-60   | ≥61        |
| <i>Pinus armandii</i> , <i>P. densata</i> ,                                             | N        | NF       | ≤30              | 31-50       | 51-60     | 61-80   | ≥81        |
| <i>P. kesiya</i> var. <i>langbianensis</i> ,                                            | N        | PF       | ≤20              | 21-30       | 31-40     | 41-60   | ≥61        |
| <i>P. massoniana</i> , <i>P.</i>                                                        | S        | NF       | ≤20              | 21-30       | 31-40     | 41-60   | ≥61        |
| <i>tabuliformis</i> , <i>P. yunnanensis</i>                                             | S        | PF       | ≤10              | 11-20       | 21-30     | 31-50   | ≥51        |
| <i>Cryptomeria</i> sp.,                                                                 |          |          |                  |             |           |         |            |
| <i>Cunninghamia</i> sp.,                                                                | S        | PF       | ≤10              | 11-20       | 21-25     | 26-35   | ≥36        |
| <i>Metasequoia</i> sp.                                                                  |          |          |                  |             |           |         |            |
| <i>Populus</i> sp., <i>Pterocarya</i> sp.,                                              | N        | NF       | ≤20              | 21-30       | 31-40     | 41-60   | ≥61        |
| <i>Salix</i> sp., <i>Sassafras</i> sp.,                                                 | N        | PF       | ≤10              | 11-15       | 16-20     | 21-30   | ≥31        |
| <i>Paulownia</i> sp.                                                                    | S        | PF       | ≤5               | 6-10        | 11-15     | 16-25   | ≥26        |
| <i>Melia</i> sp.                                                                        | S        | NF       | ≤20              | 21-30       | 31-40     | 41-60   | ≥61        |
|                                                                                         | S        | PF       | ≤5               | 6-10        | 11-15     | 16-25   | ≥26        |
| <i>Robinia pseudoacacia</i>                                                             | N        | NF & PF  | ≤10              | 11-15       | 16-20     | 21-30   | ≥31        |
|                                                                                         | S        | NF & PF  | ≤5               | 6-10        | 11-15     | 16-25   | ≥26        |
| <i>Acacia</i> sp., <i>Casuarina</i> sp.,                                                | S        | PF       | ≤5               | 6-10        | 11-15     | 16-25   | ≥26        |
| <i>Eucalyptus</i> sp., etc.                                                             |          |          |                  |             |           |         |            |
| <i>Betula</i> sp. (excluding <i>Betula dahurica</i> ), <i>Davidia</i> sp.,              | N        | NF       | ≤30              | 31-50       | 51-60     | 61-80   | ≥81        |
| <i>Liquidambar</i> sp., <i>Schima</i>                                                   | N        | PF       | ≤20              | 21-30       | 31-40     | 41-60   | ≥61        |
|                                                                                         | S        | NF       | ≤20              | 21-40       | 41-50     | 51-70   | ≥71        |

| Dominant tree species                                                                                                                                                                                                                                            | Region † | Origin ‡ | Age class (year) |             |           |        |            |
|------------------------------------------------------------------------------------------------------------------------------------------------------------------------------------------------------------------------------------------------------------------|----------|----------|------------------|-------------|-----------|--------|------------|
|                                                                                                                                                                                                                                                                  |          |          | Young            | Middle-aged | Premature | Mature | Overmature |
| sp., <i>Ulmus</i> sp.                                                                                                                                                                                                                                            | S        | PF       | ≤10              | 11-20       | 21-30     | 31-50  | ≥51        |
| <i>Acer</i> sp., <i>Betula dahurica</i> ,<br><i>Castanopsis</i> sp.,<br><i>Cinnamomum</i> sp., <i>Fraxinus</i><br>sp., <i>Juglans</i> sp., <i>Machilus</i><br>sp., <i>Phellodendron</i> sp.,<br><i>Phoebe</i> sp., <i>Quercus</i> sp.,<br><i>Tilia</i> sp., etc. | N        | NF       | ≤40              | 41-60       | 61-80     | 81-120 | ≥121       |
|                                                                                                                                                                                                                                                                  | S        | PF       | ≤20              | 21-40       | 41-50     | 51-70  | ≥71        |

- 1 \* National Forestry and Grassland Administration of China: Regulations for Age-class and Age-group Division of Main Tree
- 2 Species (LY/T 2908-2017), National Forestry and Grassland Administration of China, Beijing, China, 10pp., 2017.
- 3 † Mainland China is categorized by a demarcation line (Qinling Mountains-Huaihe River Line) into two regions: the North
- 4 (N, the north of the Line, including cold- and warm-temperate zones) and the South (S, the south of the Line, including
- 5 subtropical and tropical zones).
- 6 ‡ Forests are categorized by stand origin into natural forest (NF) and planted forest (PF).

1 **Appendix B: Height-diameter curves for tree species (group) \***

| Tree species (group) †                   | <i>a</i> (S.E.) | <i>b</i> (S.E.) | <i>n</i> | <i>R</i> <sup>2</sup> |
|------------------------------------------|-----------------|-----------------|----------|-----------------------|
| <i>Abies, Picea</i>                      | 1.1457 (0.1626) | 0.9093 (0.0517) | 30       | 0.917                 |
| <i>Cunninghamia lanceolata</i>           | 0.7226 (0.0286) | 1.0492 (0.0160) | 236      | 0.948                 |
| <i>Cupressus</i>                         | 0.9808 (0.3725) | 0.8966 (0.1420) | 18       | 0.714                 |
| <i>Larix</i>                             | 1.8234 (0.1739) | 0.7541 (0.0422) | 85       | 0.794                 |
| <i>Pinus massoniana, P. taiwanensis</i>  | 0.8895 (0.0726) | 0.9910 (0.0325) | 85       | 0.918                 |
| <i>P. tabuliformis</i>                   | 1.0951 (0.1066) | 0.8184 (0.0428) | 106      | 0.778                 |
| Other temperate conifers                 | 1.2506 (0.1743) | 0.7810 (0.0546) | 75       | 0.737                 |
| Other subtropical conifers               | 0.7682 (0.2594) | 0.9740 (0.1307) | 50       | 0.536                 |
| <i>Populus</i>                           | 2.0623 (0.4852) | 0.6679 (0.0881) | 32       | 0.657                 |
| Temperate deciduous broadleaved trees    | 1.8784 (0.3111) | 0.7087 (0.0689) | 51       | 0.683                 |
| Subtropical deciduous broadleaved trees  | 1.5194 (0.3618) | 0.8057 (0.0978) | 20       | 0.790                 |
| Fast-growing evergreen broadleaved trees | 2.3643 (0.3310) | 0.6932 (0.0555) | 87       | 0.647                 |
| Other evergreen broadleaved trees        | 1.8980 (0.2141) | 0.7106 (0.0443) | 87       | 0.751                 |

2 \* Data of mean diameter at breast height (D, cm) and height (H, m) are from Luo et al. (2013). H-D curves are depicted by  
3 using model  $H=a D^b$ , where *a* and *b* are equation coefficients. S.E., standard error; *n*, sample size; and *R*<sup>2</sup>, coefficient of  
4 determination.

5 † To categorize tree species (group), the following factors are considered in decreasing order of significance: adequate  
6 sample size (generally >20), similar phylogenetic relationship, similar ecophysiological characteristics, and similar growth  
7 conditions.

1 **Appendix C:** Temporal change of compiled studies during the period 1978-2013. Trend line is smoothed by using an adjacent  
2 **5-point averaging method.**

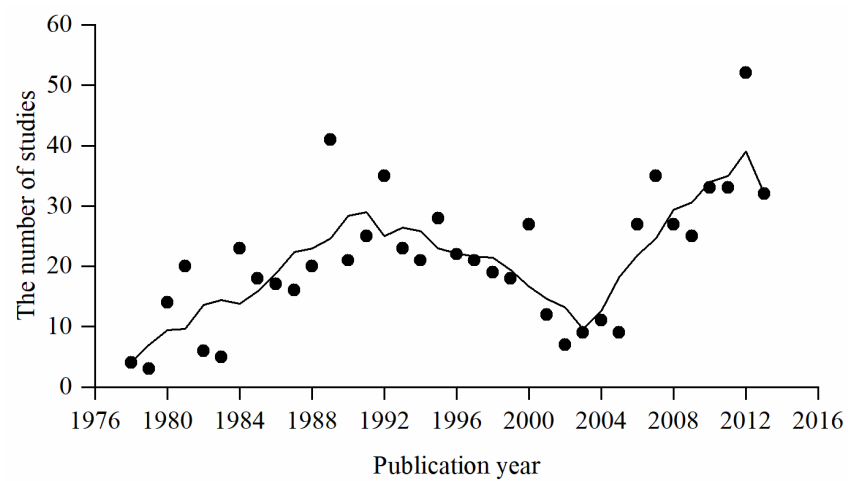

3

1 **Appendix D:** Number of retained biomass equations by tree species and biomass component. “–” denotes no equations for a tree  
2 biomass component (group). Species names are checked with online Flora of China (<http://frps.iplant.cn/>). Mixed species in column  
3 “Tree species (group)” refer to tree species groups (e.g., deciduous broadleaved trees, a certain diameter-class mixed species, even  
4 generalized) that biomass equations are developed for. Abbreviations: SBs, stem biomass subcomponents (stem wood and bark); SB,  
5 stem biomass; BBs, branch biomass subcomponents (e.g. different aged branches); BB, branch biomass; LBs, leaf biomass  
6 subcomponents (different aged leaves); LB, leaf biomass; FF, flower and fruit biomass; CB, tree crown biomass (BB+LB); AW,  
7 aboveground woody biomass (SB+BB); AG, aboveground biomass (SB+BB+LB+FF); BGs, belowground biomass subcomponents  
8 (e.g. different diameter roots); BG, belowground biomass; TB, tree biomass (AG+BG).

| No. | Tree species (group)                                                               | Number<br>of studies | The number of biomass equations |    |     |    |     |    |    |    |    |    |     |    |    |       |
|-----|------------------------------------------------------------------------------------|----------------------|---------------------------------|----|-----|----|-----|----|----|----|----|----|-----|----|----|-------|
|     |                                                                                    |                      | SBs                             | SB | BBs | BB | LBs | LB | FF | CB | AW | AG | BGs | BG | TB | Total |
| 1   | <i>Abies fabri</i> (Mast.) Craib                                                   | 3                    | 4                               | 2  | –   | 4  | –   | 4  | –  | –  | –  | 3  | –   | 4  | 2  | 23    |
| 2   | <i>Abies georgei</i> Orr                                                           | 1                    | 2                               | –  | –   | 1  | –   | 1  | –  | –  | –  | –  | 2   | –  | –  | 6     |
| 3   | <i>Abies georgei</i> Orr var.<br><i>smithii</i> (Viguie et Gaussen)<br>Cheng et L. | 1                    | 4                               | –  | –   | 2  | –   | 2  | –  | –  | –  | 2  | –   | 2  | 2  | 14    |
| 4   | <i>Abies nephrolepis</i> (Trautv.<br>ex Maxim.) Maxim.                             | 1                    | 4                               | –  | –   | 2  | –   | 2  | –  | –  | –  | –  | –   | 2  | 2  | 12    |
| 5   | <i>Acacia auriculiformis</i> A.<br>Cunningham ex Bentham                           | 5                    | 6                               | 3  | –   | 6  | –   | 6  | –  | –  | –  | 3  | –   | 5  | 2  | 31    |
| 6   | <i>Acacia confuse</i> Merrill                                                      | 1                    | –                               | 1  | –   | 1  | –   | 1  | –  | –  | –  | 1  | –   | –  | –  | 4     |
| 7   | <i>Acacia dealbata</i> Link                                                        | 3                    | 2                               | 3  | –   | 4  | –   | 4  | 1  | –  | –  | 1  | –   | 4  | 4  | 23    |
| 8   | <i>Acacia mangium</i> Willd.                                                       | 6                    | 6                               | 5  | –   | 8  | –   | 8  | –  | –  | –  | 4  | –   | 3  | –  | 34    |
| 9   | <i>Acacia mearnsii</i> De<br>Wildeman                                              | 1                    | 1                               | 1  | –   | 1  | –   | 1  | –  | –  | –  | 1  | –   | –  | –  | 5     |
| 10  | <i>Acer mandshuricum</i><br>Maxim.                                                 | 1                    | –                               | 1  | 2   | –  | –   | 1  | –  | –  | –  | –  | –   | –  | –  | 4     |
| 11  | <i>Acer mono</i> Maxim.                                                            | 7                    | –                               | 9  | 10  | 5  | –   | 9  | –  | –  | –  | 3  | 2   | 5  | 3  | 46    |
| 12  | <i>Acer truncatum</i> Bunge                                                        | 1                    | 2                               | –  | –   | 1  | –   | 1  | –  | –  | –  | –  | –   | 1  | –  | 5     |
| 13  | <i>Ailanthus altissima</i> (Mill.)<br>Swingle                                      | 1                    | –                               | 1  | –   | 1  | –   | 1  | –  | –  | –  | –  | –   | 1  | 1  | 5     |
| 14  | <i>Alniphyllum fortunei</i><br>(Hemsl.) Makino                                     | 2                    | –                               | 2  | –   | 2  | –   | 2  | –  | –  | –  | –  | –   | 2  | –  | 8     |

| No. | Tree species (group)                                                    | Number<br>of studies | The number of biomass equations |    |     |    |     |    |    |    |    |    |     |    |    |       |
|-----|-------------------------------------------------------------------------|----------------------|---------------------------------|----|-----|----|-----|----|----|----|----|----|-----|----|----|-------|
|     |                                                                         |                      | SBs                             | SB | BBs | BB | LBs | LB | FF | CB | AW | AG | BGs | BG | TB | Total |
| 15  | <i>Alnus cremastogyne</i> Burk.                                         | 4                    | 2                               | 4  | –   | 5  | –   | 5  | –  | –  | –  | 3  | –   | 3  | 3  | 25    |
| 16  | <i>Alnus sibirica</i> Fisch. ex<br>Turcz                                | 4                    | 8                               | 1  | –   | 5  | –   | 5  | –  | –  | –  | –  | –   | 5  | 4  | 28    |
| 17  | <i>Amygdalus persica</i> L.                                             | 1                    | –                               | 1  | –   | 1  | –   | 1  | –  | –  | –  | –  | –   | 1  | 1  | 5     |
| 18  | <i>Aporosa yunnanensis</i> (Pax<br>et Hoffm.) Metc.                     | 1                    | –                               | 1  | –   | 1  | –   | 1  | –  | –  | –  | –  | –   | 1  | 1  | 5     |
| 19  | <i>Azadirachta indica</i> A.<br>Juss.                                   | 1                    | –                               | 2  | –   | 2  | –   | 2  | –  | –  | –  | 2  | –   | 2  | 2  | 12    |
| 20  | <i>Betula albosinensis</i> Burk.                                        | 1                    | 2                               | –  | –   | 1  | –   | 1  | 1  | –  | –  | –  | –   | 1  | –  | 6     |
| 21  | <i>Betula alnoides</i><br>Buch.-Ham. ex D. Don                          | 4                    | 2                               | 6  | –   | 7  | –   | 7  | –  | –  | –  | –  | –   | 7  | 6  | 35    |
| 22  | <i>Betula costata</i> Trautv.                                           | 2                    | 2                               | 1  | 2   | 1  | –   | 2  | –  | –  | –  | 1  | –   | –  | –  | 9     |
| 23  | <i>Betula dahurica</i> Pall.                                            | 2                    | –                               | 2  | –   | 2  | –   | 2  | –  | –  | –  | 1  | 2   | 1  | 1  | 11    |
| 24  | <i>Betula luminifera</i> H.<br>Winkl.                                   | 3                    | 2                               | 3  | –   | 4  | –   | 4  | –  | –  | –  | 2  | –   | 2  | 1  | 18    |
| 25  | <i>Betula platyphylla</i> Suk.                                          | 18                   | 26                              | 8  | 8   | 19 | –   | 21 | –  | –  | –  | 4  | 2   | 16 | 11 | 115   |
| 26  | <i>Camellia oleifera</i> Abel.                                          | 1                    | 2                               | –  | 2   | –  | –   | 1  | –  | –  | –  | –  | 3   | –  | 1  | 9     |
| 27  | <i>Caryota ochlandra</i> Hance                                          | 1                    | –                               | 1  | –   | 1  | –   | 1  | –  | –  | –  | –  | –   | 1  | –  | 4     |
| 28  | <i>Castanopsis echidnocarpa</i><br>J. D. Hooker et Thomson<br>ex Miquel | 2                    | –                               | 2  | –   | 2  | –   | 2  | –  | –  | –  | –  | –   | 2  | –  | 8     |
| 29  | <i>Castanopsis eyrei</i><br>(Champ.) Tutch.                             | 1                    | 4                               | –  | 4   | –  | –   | 2  | –  | –  | –  | 2  | –   | –  | –  | 12    |
| 30  | <i>Castanopsis fargesii</i><br>Franch.                                  | 4                    | 2                               | 2  | 2   | 2  | –   | 3  | –  | –  | –  | 2  | –   | 2  | –  | 15    |
| 31  | <i>Castanopsis fissa</i> (Champ.<br>ex Benth.) Rehd. et Wils.           | 2                    | 2                               | 1  | –   | 2  | –   | 2  | –  | –  | –  | –  | –   | 2  | 1  | 10    |
| 32  | <i>Castanopsis hystrix</i> Miq.                                         | 2                    | 2                               | 1  | –   | 2  | –   | 2  | –  | –  | –  | –  | 2   | 1  | –  | 10    |
| 33  | <i>Castanopsis kawakamii</i><br>Hayata                                  | 1                    | –                               | 1  | –   | 1  | –   | 1  | –  | –  | –  | –  | –   | –  | –  | 3     |
| 34  | <i>Castanopsis orthacantha</i>                                          | 1                    | –                               | 1  | –   | 1  | –   | 1  | –  | –  | –  | –  | –   | 1  | 1  | 5     |

| No. | Tree species (group)                                                         | Number<br>of studies | The number of biomass equations |    |     |    |     |    |    |    |    |    |     |    |    |       |
|-----|------------------------------------------------------------------------------|----------------------|---------------------------------|----|-----|----|-----|----|----|----|----|----|-----|----|----|-------|
|     |                                                                              |                      | SBs                             | SB | BBs | BB | LBs | LB | FF | CB | AW | AG | BGs | BG | TB | Total |
|     | Franch.                                                                      |                      |                                 |    |     |    |     |    |    |    |    |    |     |    |    |       |
| 35  | <i>Castanopsis rufescens</i><br>(Hook. f. et Thoms.)<br>Huang et Y. T. Chang | 1                    | –                               | 1  | –   | 1  | –   | 1  | –  | –  | –  | 1  | –   | –  | –  | 4     |
| 36  | <i>Castanopsis sclerophylla</i><br>(Lindl.) Schott.                          | 1                    | –                               | –  | –   | –  | –   | –  | –  | –  | –  | –  | –   | 2  | –  | 2     |
| 37  | <i>Casuarina equisetifolia</i><br>Forst.                                     | 5                    | 8                               | 2  | –   | 6  | –   | 6  | –  | –  | –  | –  | –   | 3  | –  | 25    |
| 38  | <i>Celtis philippensis</i> Blanco                                            | 1                    | –                               | 1  | –   | 1  | –   | 1  | –  | –  | –  | –  | –   | 1  | 1  | 5     |
| 39  | <i>Cercidiphyllum japonicum</i><br>Sieb. et Zucc.                            | 1                    | 4                               | –  | –   | 2  | –   | 2  | –  | –  | –  | 2  | 4   | 2  | 2  | 18    |
| 40  | <i>Choerospondias axillaris</i><br>(Roxb.) Burtt et Hill.                    | 1                    | –                               | 1  | –   | 1  | –   | 1  | –  | –  | –  | –  | –   | 1  | 1  | 5     |
| 41  | <i>Cinnamomum bodinieri</i><br>Levl.                                         | 2                    | –                               | 2  | –   | 2  | –   | 2  | –  | –  | –  | –  | –   | 2  | 2  | 10    |
| 42  | <i>Cinnamomum camphora</i><br>(L.) Presl                                     | 6                    | 10                              | 3  | –   | 8  | –   | 8  | –  | –  | –  | 2  | 6   | 8  | 6  | 51    |
| 43  | <i>Citrus reticulata</i> Blanco                                              | 1                    | –                               | 1  | –   | 1  | –   | 1  | –  | –  | –  | –  | –   | 1  | 1  | 5     |
| 44  | <i>Cleidion brevipetiolatum</i><br>Pax et Hoffm.                             | 1                    | –                               | 1  | –   | 1  | –   | 1  | –  | –  | –  | –  | –   | 1  | 1  | 5     |
| 45  | <i>Cleistanthus sumatranus</i><br>(Miq.) Müll. Arg.                          | 1                    | –                               | 1  | –   | 1  | –   | 1  | –  | –  | –  | –  | –   | 1  | 1  | 5     |
| 46  | <i>Cryptocarya chinensis</i><br>(Hance) Hemsl.                               | 1                    | –                               | 1  | –   | 1  | –   | 1  | –  | –  | –  | –  | –   | 1  | 1  | 5     |
| 47  | <i>Cryptocarya concinna</i><br>Hance                                         | 1                    | –                               | 1  | –   | 1  | –   | 1  | –  | –  | –  | –  | –   | 1  | 1  | 5     |
| 48  | <i>Cryptomeria fortunei</i><br>Hooibrenk ex Otto et<br>Dietr.                | 4                    | 6                               | 4  | –   | 5  | –   | 5  | –  | 2  | –  | 4  | –   | 7  | 5  | 38    |
| 49  | <i>Cryptomeria japonica</i><br>(Thunb. ex L.f.) D. Don                       | 2                    | 4                               | –  | 2   | –  | –   | 2  | –  | –  | –  | –  | –   | 2  | 2  | 12    |



| No. | Tree species (group)                                                                | Number<br>of studies | The number of biomass equations |    |     |     |     |     |    |    |    |    |     |     |    |       |
|-----|-------------------------------------------------------------------------------------|----------------------|---------------------------------|----|-----|-----|-----|-----|----|----|----|----|-----|-----|----|-------|
|     |                                                                                     |                      | SBs                             | SB | BBs | BB  | LBs | LB  | FF | CB | AW | AG | BGs | BG  | TB | Total |
| 50  | <i>Cunninghamia lanceolata</i><br>(Lamb.) Hook.                                     | 130                  | 152                             | 70 | 2   | 140 | 1   | 141 | 4  | 4  | –  | 31 | 25  | 106 | 30 | 706   |
| 51  | <i>Cupressus funebris</i> Endl.                                                     | 4                    | 2                               | 3  | –   | 4   | –   | 4   | –  | –  | –  | 2  | –   | 4   | 3  | 22    |
| 52  | <i>Cupressus lusitanica</i> Mill.                                                   | 1                    | –                               | 1  | –   | 1   | –   | 1   | –  | –  | –  | –  | –   | 1   | 1  | 5     |
| 53  | <i>Cyclobalanopsis delavayi</i><br>(Franch.) Schott.                                | 1                    | –                               | 1  | –   | 1   | –   | 1   | –  | –  | –  | –  | –   | 1   | 1  | 5     |
| 54  | <i>Cyclobalanopsis glauca</i><br>(Thunb.) Oerst.                                    | 8                    | 6                               | 9  | 6   | 9   | –   | 12  | 3  | –  | –  | 11 | 11  | 6   | 6  | 79    |
| 55  | <i>Elaeocarpus decipiens</i><br>Hemsl.                                              | 1                    | –                               | 1  | –   | 1   | –   | 1   | –  | –  | –  | –  | –   | 1   | 1  | 5     |
| 56  | <i>Elaeocarpus sylvestris</i><br>(Lour.) Poir.                                      | 2                    | 4                               | –  | –   | 2   | –   | 2   | –  | –  | –  | –  | –   | 2   | 1  | 11    |
| 57  | <i>Engelhardtia roxburghiana</i><br>Lindl.                                          | 1                    | –                               | 1  | –   | 1   | –   | 1   | –  | –  | –  | –  | –   | 1   | –  | 4     |
| 58  | <i>Erythrophleum fordii</i> Oliv.                                                   | 1                    | 2                               | –  | –   | 1   | –   | 1   | –  | –  | –  | –  | –   | 1   | –  | 5     |
| 59  | <i>Eucalyptus camaldulensis</i><br>Dehnh.                                           | 2                    | –                               | 2  | –   | 2   | –   | 2   | –  | –  | –  | 2  | –   | 2   | –  | 10    |
| 60  | <i>Eucalyptus citriodora</i><br>Hook.f.                                             | 1                    | 4                               | –  | –   | 2   | –   | 2   | –  | –  | –  | 2  | 4   | 2   | 2  | 18    |
| 61  | <i>Eucalyptus exserta</i> F. V.<br>Muell.                                           | 2                    | 2                               | 1  | –   | 2   | –   | 2   | 1  | –  | –  | –  | –   | 2   | –  | 10    |
| 62  | <i>Eucalyptus globulus</i><br>Labill.                                               | 1                    | 2                               | –  | –   | 1   | –   | 1   | –  | –  | –  | –  | –   | 3   | –  | 7     |
| 63  | <i>Eucalyptus grandis</i> Hill ex<br>Maiden $\times$ <i>urophylla</i> S.T.<br>Blake | 4                    | 8                               | –  | –   | 4   | –   | 4   | 3  | –  | –  | –  | –   | 1   | –  | 20    |
| 64  | <i>Eucalyptus leizhouensis</i><br>No.1                                              | 2                    | 8                               | –  | –   | 4   | –   | 4   | –  | –  | –  | 4  | 4   | 4   | 4  | 32    |
| 65  | <i>Eucalyptus urophylla</i> S.T.<br>Blake                                           | 8                    | 24                              | –  | –   | 12  | –   | 12  | –  | –  | –  | 8  | –   | 4   | –  | 60    |
| 66  | <i>Eucalyptus urophylla</i> S.T.                                                    | 7                    | 16                              | –  | –   | 8   | –   | 8   | –  | –  | –  | 2  | 4   | 7   | 2  | 47    |

| No. | Tree species (group)                                                                   | Number<br>of studies | The number of biomass equations |    |     |    |     |    |    |    |    |    |     |    |    |       |
|-----|----------------------------------------------------------------------------------------|----------------------|---------------------------------|----|-----|----|-----|----|----|----|----|----|-----|----|----|-------|
|     |                                                                                        |                      | SBs                             | SB | BBs | BB | LBs | LB | FF | CB | AW | AG | BGs | BG | TB | Total |
|     | Blake × grandis Hill ex<br>Maiden                                                      |                      |                                 |    |     |    |     |    |    |    |    |    |     |    |    |       |
| 67  | <i>Eucommia ulmoides</i><br>Oliver                                                     | 6                    | 12                              | 1  | –   | 7  | –   | 7  | –  | –  | –  | 2  | –   | 7  | 5  | 41    |
| 68  | <i>Fagus engleriana</i> Seemen                                                         | 1                    | –                               | 2  | –   | 2  | –   | 2  | –  | –  | –  | –  | –   | 2  | –  | 8     |
| 69  | <i>Ficus microcarpa</i> L.f.                                                           | 1                    | –                               | 1  | –   | 1  | –   | 1  | –  | –  | –  | –  | –   | 1  | –  | 4     |
| 70  | <i>Fokienia hodginsii</i> (Dunn)<br>Henry et Thomas                                    | 3                    | 6                               | 2  | –   | 5  | –   | 5  | –  | 2  | –  | –  | –   | 3  | 3  | 26    |
| 71  | <i>Fraxinus mandshurica</i><br>Rupr.                                                   | 7                    | –                               | 9  | 10  | 5  | –   | 9  | –  | –  | –  | 3  | 2   | 3  | 3  | 44    |
| 72  | <i>Fraxinus rhynchophylla</i><br>Hance                                                 | 1                    | –                               | 2  | –   | 2  | –   | 2  | –  | –  | –  | –  | –   | 2  | –  | 8     |
| 73  | <i>Ginkgo biloba</i> L.                                                                | 1                    | –                               | 1  | –   | 1  | –   | 1  | –  | –  | –  | –  | –   | 1  | 1  | 5     |
| 74  | <i>Gordonia acuminata</i><br>Chang                                                     | 2                    | –                               | 2  | –   | 2  | –   | 2  | –  | –  | –  | –  | –   | 2  | –  | 8     |
| 75  | <i>Hevea brasiliensis</i> (Willd.<br>ex A. Juss.) Müll. Arg.                           | 8                    | –                               | 12 | –   | 12 | –   | 12 | –  | –  | –  | 7  | 4   | 7  | 7  | 61    |
| 76  | <i>Idesia polycarpa</i> Maxim.                                                         | 1                    | –                               | 2  | –   | –  | –   | –  | –  | 2  | –  | 2  | –   | –  | –  | 6     |
| 77  | <i>Juglans mandshurica</i><br>Maxim.                                                   | 3                    | 2                               | 3  | 2   | 4  | –   | 4  | –  | –  | –  | 1  | 2   | 2  | 1  | 21    |
| 78  | <i>Keteleeria davidiana</i><br>(Bertr.) Beissn.                                        | 1                    | –                               | 2  | –   | 2  | –   | 2  | –  | –  | –  | 2  | –   | 2  | 2  | 12    |
| 79  | <i>Koelreuteria bipinnata</i><br>Franch. var. <i>integrifoliola</i><br>(Merr.) T. Chen | 1                    | 2                               | –  | –   | 1  | –   | 1  | –  | –  | –  | –  | –   | 1  | 1  | 6     |
| 80  | <i>Koelreuteria paniculata</i><br>Laxm.                                                | 1                    | –                               | 1  | –   | 1  | –   | 1  | –  | –  | –  | –  | –   | 1  | 1  | 5     |
| 81  | <i>Larix chinensis</i> Beissn.                                                         | 2                    | –                               | 2  | –   | 2  | –   | 2  | –  | –  | –  | –  | –   | 1  | 1  | 8     |
| 82  | <i>Larix gmelinii</i> (Rupr.)<br>Kuzen.                                                | 27                   | 30                              | 17 | –   | 32 | 2   | 32 | –  | –  | –  | 10 | 2   | 22 | 10 | 157   |
| 83  | <i>Larix kaempferi</i> (Lamb.)                                                         | 7                    | 10                              | 6  | –   | 11 | –   | 11 | –  | –  | –  | 3  | –   | 11 | 9  | 61    |

| No. | Tree species (group)                                                                 | Number<br>of studies | The number of biomass equations |    |     |    |     |    |    |    |    |    |     |    |    |       |
|-----|--------------------------------------------------------------------------------------|----------------------|---------------------------------|----|-----|----|-----|----|----|----|----|----|-----|----|----|-------|
|     |                                                                                      |                      | SBs                             | SB | BBs | BB | LBs | LB | FF | CB | AW | AG | BGs | BG | TB | Total |
|     | Carr.                                                                                |                      |                                 |    |     |    |     |    |    |    |    |    |     |    |    |       |
| 84  | <i>Larix mastersiana</i> Rehd. et Wils.                                              | 1                    | 4                               | –  | –   | 2  | –   | 2  | –  | –  | –  | –  | –   | 2  | 2  | 12    |
| 85  | <i>Larix olgensis</i> Henry                                                          | 8                    | 10                              | 6  | –   | 10 | –   | 10 | –  | 1  | –  | 5  | –   | 8  | 6  | 56    |
| 86  | <i>Larix principis-rupprechtii</i> Mayr.                                             | 30                   | 32                              | 27 | 6   | 41 | –   | 43 | –  | –  | –  | 20 | –   | 38 | 28 | 235   |
| 87  | <i>Lasiococca comberi</i> Haines                                                     | 1                    | –                               | 1  | –   | 1  | –   | 1  | –  | –  | –  | –  | –   | 1  | 1  | 5     |
| 88  | <i>Ligustrum lucidum</i> Ait.                                                        | 2                    | –                               | 2  | –   | 2  | –   | 2  | –  | –  | –  | –  | –   | 2  | 2  | 10    |
| 89  | <i>Liquidambar formosana</i> Hance                                                   | 3                    | 2                               | 2  | –   | 3  | –   | 3  | –  | –  | –  | –  | –   | 3  | –  | 13    |
| 90  | <i>Liriodendron chinense</i> (Hemsl.) Sargent.                                       | 2                    | 4                               | 1  | –   | 3  | –   | 3  | –  | –  | –  | 3  | –   | 2  | 2  | 18    |
| 91  | <i>Lithocarpus craibianus</i> Barn.                                                  | 1                    | –                               | 1  | –   | 1  | –   | 1  | –  | –  | –  | –  | –   | 1  | 1  | 5     |
| 92  | <i>Lithocarpus glaber</i> (Thunb.) Nakai                                             | 2                    | 4                               | 2  | 4   | 2  | –   | 4  | 2  | –  | –  | 4  | 4   | 2  | 2  | 30    |
| 93  | <i>Lithocarpus xylocarpus</i> (Kurz) Markgr.                                         | 1                    | –                               | 1  | –   | 1  | –   | 1  | –  | –  | –  | 1  | –   | –  | –  | 4     |
| 94  | <i>Litsea cubeba</i> (Lour.) Pers.                                                   | 1                    | –                               | 1  | –   | 1  | –   | 1  | 1  | –  | –  | –  | –   | 1  | 1  | 6     |
| 95  | <i>Litsea pungens</i> Hemsl.                                                         | 1                    | –                               | 1  | –   | 1  | –   | 1  | –  | –  | –  | –  | –   | 1  | –  | 4     |
| 96  | <i>Macaranga denticulata</i> (Bl.) Müll. Arg.                                        | 1                    | –                               | 1  | –   | 1  | –   | 1  | –  | –  | –  | –  | –   | 1  | –  | 4     |
| 97  | <i>Machilus pauhoi</i> Kaneh.                                                        | 1                    | 2                               | –  | –   | 1  | –   | 1  | –  | –  | –  | 1  | –   | –  | –  | 5     |
| 98  | <i>Machilus viridis</i> Hand.-Mazz.                                                  | 1                    | –                               | 1  | –   | 1  | –   | 1  | –  | –  | –  | 1  | –   | –  | –  | 4     |
| 99  | <i>Magnolia officinalis</i> Rehd. et Wils.                                           | 2                    | 6                               | –  | –   | 3  | –   | 3  | –  | –  | –  | 3  | 2   | 1  | 1  | 19    |
| 100 | <i>Magnolia officinalis</i> Rehd. et Wils. subsp. <i>biloba</i> (Rehd. et Wils.) Law | 1                    | 2                               | –  | –   | 1  | –   | 1  | –  | –  | –  | –  | –   | 1  | 1  | 6     |

| No. | Tree species (group)                                                              | Number<br>of studies | The number of biomass equations |    |     |    |     |    |    |    |    |    |     |    |    |       |
|-----|-----------------------------------------------------------------------------------|----------------------|---------------------------------|----|-----|----|-----|----|----|----|----|----|-----|----|----|-------|
|     |                                                                                   |                      | SBs                             | SB | BBs | BB | LBs | LB | FF | CB | AW | AG | BGs | BG | TB | Total |
| 101 | <i>Mallotus paniculatus</i><br>(Lam.) Müll. Arg.                                  | 3                    | –                               | 3  | –   | 3  | –   | 3  | –  | –  | –  | –  | –   | 3  | –  | 12    |
| 102 | <i>Malus pumila</i> Mill.                                                         | 1                    | –                               | 1  | –   | 1  | –   | 1  | 1  | –  | –  | –  | –   | 1  | –  | 5     |
| 103 | <i>Manglietia glauca</i> Blume                                                    | 1                    | 2                               | –  | –   | 1  | –   | 1  | –  | –  | –  | –  | 4   | –  | –  | 8     |
| 104 | <i>Manglietia hainanensis</i><br>Dandy                                            | 1                    | 4                               | –  | –   | 2  | –   | 2  | –  | –  | –  | 2  | –   | –  | –  | 10    |
| 105 | <i>Manglietia insignis</i> (Wall.)<br>Blume                                       | 1                    | –                               | 1  | –   | 1  | –   | 1  | –  | –  | –  | 1  | –   | –  | –  | 4     |
| 106 | <i>Metasequoia</i><br><i>glyptostroboides</i> Hu et<br>Cheng                      | 9                    | 4                               | 11 | –   | 13 | –   | 13 | –  | –  | –  | 8  | –   | 8  | 8  | 65    |
| 107 | <i>Michelia hedyosperma</i><br>Law                                                | 1                    | 2                               | –  | –   | 1  | –   | 1  | –  | –  | –  | 1  | –   | 1  | 1  | 7     |
| 108 | <i>Michelia macclurei</i> Dandy                                                   | 3                    | 2                               | 2  | –   | 3  | –   | 3  | –  | –  | –  | –  | –   | 3  | 1  | 14    |
| 109 | <i>Millettia laptobotrya</i><br>Wight et Arn.                                     | 1                    | –                               | 1  | –   | 1  | –   | 1  | –  | –  | –  | –  | –   | 1  | –  | 4     |
| 110 | <i>Mytilaria laosensis</i><br>Lecomte                                             | 3                    | 6                               | 1  | –   | 4  | –   | 4  | –  | –  | –  | –  | 4   | 2  | 2  | 23    |
| 111 | <i>Ormosia hosiei</i> Hemsl. et<br>Wils.                                          | 1                    | –                               | 1  | –   | 1  | –   | 1  | –  | –  | –  | –  | –   | 1  | –  | 4     |
| 112 | <i>Ormosia xylocarpa</i> Chun<br>ex L. Chen                                       | 1                    | –                               | 1  | –   | 1  | –   | 1  | –  | –  | –  | –  | –   | 1  | –  | 4     |
| 113 | <i>Paramichelia baillonii</i><br>(Pierre) Hu                                      | 1                    | 2                               | –  | –   | 1  | –   | 1  | –  | –  | –  | 1  | –   | 1  | 1  | 7     |
| 114 | <i>Parashorea chinensis</i><br>Wang Hsie                                          | 1                    | 2                               | –  | –   | 1  | –   | 1  | –  | –  | –  | 1  | 4   | 1  | 1  | 11    |
| 115 | <i>Paulownia elongata</i> S.Y.<br>Hu                                              | 7                    | 2                               | 10 | –   | 11 | –   | 11 | 3  | 8  | –  | 9  | –   | 11 | 10 | 75    |
| 116 | <i>Paulownia tomentosa</i><br>(Thunb.) Steud. × <i>fortunei</i><br>(Seem.) Hemsl. | 1                    | –                               | 1  | –   | 1  | –   | 1  | –  | –  | –  | 1  | –   | –  | –  | 4     |

| No. | Tree species (group)                                                                                  | Number<br>of studies | The number of biomass equations |    |     |    |     |    |    |    |    |    |     |    |    |       |
|-----|-------------------------------------------------------------------------------------------------------|----------------------|---------------------------------|----|-----|----|-----|----|----|----|----|----|-----|----|----|-------|
|     |                                                                                                       |                      | SBs                             | SB | BBs | BB | LBs | LB | FF | CB | AW | AG | BGs | BG | TB | Total |
| 117 | <i>Phellodendron amurense</i><br>Rupr.                                                                | 2                    | –                               | 3  | 2   | 3  | –   | 3  | –  | –  | –  | 1  | 2   | 1  | 1  | 16    |
| 118 | <i>Phellodendron chinense</i><br>Schneid.                                                             | 3                    | 4                               | 1  | 2   | 2  | –   | 3  | –  | –  | –  | –  | 2   | 2  | 3  | 19    |
| 119 | <i>Phoebe bournei</i> (Hemsl.)<br>Yen C. Yang                                                         | 1                    | 2                               | –  | –   | 1  | –   | 1  | –  | –  | –  | 1  | 5   | 1  | –  | 11    |
| 120 | <i>Phoebe zhennan</i> S. Lee                                                                          | 2                    | –                               | 2  | –   | 2  | –   | 2  | –  | –  | –  | 1  | –   | 2  | 2  | 11    |
| 121 | <i>Picea asperata</i> Mast.                                                                           | 2                    | 2                               | 2  | –   | 3  | –   | 3  | –  | –  | –  | 2  | –   | 3  | 2  | 17    |
| 122 | <i>Picea brachytyla</i> (Franch.)<br>Pritz. var. <i>complanata</i><br>(Mast.) W.C. Cheng ex<br>Rehder | 1                    | 2                               | –  | –   | 1  | –   | 1  | –  | –  | –  | –  | 2   | –  | –  | 6     |
| 123 | <i>Picea crassifolia</i> Kom.                                                                         | 3                    | 6                               | 2  | –   | 5  | –   | 5  | 2  | –  | –  | 4  | –   | 3  | 2  | 29    |
| 124 | <i>Picea koraiensis</i> Nakai                                                                         | 2                    | 2                               | 1  | –   | 2  | –   | 2  | –  | –  | –  | 2  | –   | 2  | 1  | 12    |
| 125 | <i>Picea likiangensis</i> var.<br><i>balfouriana</i> (Rehd. et<br>Wils.) Hillier ex Slsvin            | 1                    | 2                               | –  | –   | 1  | –   | 1  | –  | –  | –  | –  | –   | 1  | –  | 5     |
| 126 | <i>Picea purpurea</i> Mast.                                                                           | 1                    | 2                               | –  | –   | 1  | –   | 1  | –  | –  | –  | –  | –   | 1  | –  | 5     |
| 127 | <i>Picea schrenkiana</i> Fisch.<br>et Mey.                                                            | 2                    | 6                               | 1  | –   | 3  | –   | 3  | –  | 1  | –  | 3  | –   | –  | –  | 17    |
| 128 | <i>Pinus armandii</i> Franch.                                                                         | 8                    | 18                              | –  | –   | 9  | 9   | 9  | –  | –  | –  | –  | –   | 9  | 2  | 56    |
| 129 | <i>Pinus bungeana</i> Zucc. ex<br>Endl.                                                               | 1                    | 4                               | 2  | –   | 2  | –   | 2  | –  | –  | –  | 2  | 4   | 2  | 2  | 20    |
| 130 | <i>Pinus densata</i> Mast.                                                                            | 2                    | 2                               | 2  | –   | 3  | –   | 3  | –  | –  | –  | 2  | 2   | –  | –  | 14    |
| 131 | <i>Pinus elliottii</i> Engelm.                                                                        | 13                   | 14                              | 9  | 2   | 15 | –   | 16 | –  | –  | –  | 7  | 3   | 7  | 3  | 76    |
| 132 | <i>Pinus fenzeliana</i><br>Hand.-Mazz.                                                                | 1                    | 2                               | –  | –   | 1  | –   | 1  | –  | –  | –  | –  | –   | 1  | –  | 5     |
| 133 | <i>Pinus henryi</i> Mast.                                                                             | 1                    | 2                               | –  | –   | 1  | –   | 1  | –  | –  | –  | –  | –   | 1  | –  | 5     |
| 134 | <i>Pinus kesiya</i> Royle ex<br>Gordon var. <i>langbianensis</i><br>(A. Chev.) Gaussen ex Bui         | 4                    | 8                               | –  | –   | 4  | –   | 4  | 1  | –  | –  | –  | 8   | –  | –  | 25    |

| No. | Tree species (group)                                                                           | Number<br>of studies | The number of biomass equations |    |     |    |     |    |    |    |    |    |     |    |    |       |
|-----|------------------------------------------------------------------------------------------------|----------------------|---------------------------------|----|-----|----|-----|----|----|----|----|----|-----|----|----|-------|
|     |                                                                                                |                      | SBs                             | SB | BBs | BB | LBs | LB | FF | CB | AW | AG | BGs | BG | TB | Total |
| 135 | <i>Pinus koraiensis</i> Sieb. et<br>Zucc.                                                      | 32                   | 8                               | 40 | 8   | 44 | 14  | 41 | –  | 3  | –  | 6  | 20  | 19 | 15 | 218   |
| 136 | <i>Pinus massoniana</i> Lamb.                                                                  | 60                   | 56                              | 46 | 2   | 73 | –   | 75 | 1  | 1  | 1  | 19 | 3   | 56 | 32 | 365   |
| 137 | <i>Pinus sylvestris</i> L. var.<br><i>mongolica</i> Litv.                                      | 4                    | –                               | 5  | –   | 5  | –   | 5  | –  | –  | –  | 3  | –   | 1  | –  | 19    |
| 138 | <i>Pinus sylvestris</i> L. var.<br><i>sylvestriformis</i><br>(Takenouchi) Cheng et<br>C.D. Chu | 3                    | 2                               | 2  | –   | 3  | –   | 3  | –  | –  | –  | 2  | –   | 1  | 1  | 14    |
| 139 | <i>Pinus tabuliformis</i> Carr.                                                                | 46                   | 73                              | 40 | –   | 63 | 4   | 63 | 6  | 2  | –  | 32 | 42  | 51 | 19 | 395   |
| 140 | <i>Pinus taeda</i> L.                                                                          | 6                    | 4                               | 8  | –   | 8  | –   | 9  | –  | –  | 1  | 7  | –   | 6  | 6  | 49    |
| 141 | <i>Pinus taiwanensis</i> Hayata                                                                | 9                    | 2                               | 11 | –   | 12 | –   | 12 | –  | –  | –  | 5  | 4   | 13 | 7  | 66    |
| 142 | <i>Pinus thunbergii</i> Parl.                                                                  | 2                    | 2                               | 2  | –   | 3  | –   | 3  | –  | –  | –  | 1  | –   | 3  | 3  | 17    |
| 143 | <i>Pinus yunnanensis</i> Franch.                                                               | 8                    | 6                               | 5  | –   | 8  | –   | 8  | –  | –  | –  | 1  | –   | 8  | 2  | 38    |
| 144 | <i>Platycladus orientalis</i> (L.)<br>Franco                                                   | 10                   | –                               | 11 | –   | 11 | –   | 11 | –  | –  | –  | 3  | –   | 7  | 1  | 44    |
| 145 | <i>Podocarpus imbricatus</i> Bl.                                                               | 1                    | 2                               | –  | –   | 1  | –   | 1  | –  | –  | –  | –  | –   | 1  | 1  | 6     |
| 146 | <i>Populus alba</i> L.                                                                         | 1                    | 2                               | –  | –   | 1  | –   | 1  | –  | –  | –  | –  | –   | 1  | 1  | 6     |
| 147 | <i>Populus alba</i> var.<br><i>pyramidalis</i> Bge.                                            | 2                    | 4                               | –  | 2   | 1  | –   | 2  | –  | –  | –  | –  | 2   | 1  | 2  | 14    |
| 148 | <i>Populus canadensis</i><br>Moench cv. 'I-214'                                                | 1                    | –                               | 1  | –   | 1  | –   | 1  | –  | –  | –  | –  | –   | 1  | –  | 4     |
| 149 | <i>Populus canadensis</i><br>Moench cv. 'I-69'                                                 | 4                    | 4                               | 5  | 4   | 5  | –   | 5  | –  | –  | –  | 3  | 4   | 5  | 3  | 38    |
| 150 | <i>Populus canadensis</i><br>Moench cv. 'I-72'                                                 | 9                    | 10                              | 7  | 4   | 10 | –   | 12 | –  | –  | –  | 6  | 4   | 7  | 6  | 66    |
| 151 | <i>Populus canadensis</i><br>Moench cv. 'Neva'                                                 | 1                    | –                               | 1  | –   | 1  | –   | 1  | –  | –  | –  | –  | –   | –  | –  | 3     |
| 152 | <i>Populus canadensis</i><br>Moench cv. 'Robusta'                                              | 1                    | –                               | 1  | –   | 1  | –   | 1  | –  | –  | –  | –  | –   | 1  | –  | 4     |
| 153 | <i>Populus canadensis</i>                                                                      | 1                    | –                               | 1  | –   | 1  | –   | 1  | –  | –  | –  | –  | –   | 1  | –  | 4     |

| No. | Tree species (group)                                               | Number<br>of studies | The number of biomass equations |    |     |    |     |    |    |    |    |    |     |    |    |       |
|-----|--------------------------------------------------------------------|----------------------|---------------------------------|----|-----|----|-----|----|----|----|----|----|-----|----|----|-------|
|     |                                                                    |                      | SBs                             | SB | BBs | BB | LBs | LB | FF | CB | AW | AG | BGs | BG | TB | Total |
|     | Moench cv. 'Sacrau-79'                                             |                      |                                 |    |     |    |     |    |    |    |    |    |     |    |    |       |
| 154 | <i>Populus canadensis</i>                                          | 1                    | –                               | 2  | –   | 2  | –   | 2  | –  | –  | –  | –  | –   | 2  | 2  | 10    |
|     | Moench cv. 'Zhonglin-46'                                           |                      |                                 |    |     |    |     |    |    |    |    |    |     |    |    |       |
| 155 | <i>Populus dakuanensis</i> Hsu                                     | 1                    | –                               | 2  | –   | 2  | –   | 2  | –  | –  | –  | –  | –   | 2  | 2  | 10    |
| 156 | <i>Populus davidiana</i> Dode                                      | 8                    | 8                               | 5  | 2   | 9  | –   | 9  | –  | –  | –  | 4  | 2   | 7  | 5  | 51    |
| 157 | <i>Populus deltoides</i> Bartr. ex Marsh.                          | 2                    | 4                               | –  | –   | 2  | –   | 2  | –  | –  | –  | –  | –   | 2  | –  | 10    |
| 158 | <i>Populus deltoides</i> Bartr. ex Marsh. cv. '35'                 | 1                    | 2                               | –  | –   | 1  | –   | 1  | –  | –  | –  | –  | –   | 1  | 1  | 6     |
| 159 | <i>Populus euphratica</i> Oliv.                                    | 4                    | –                               | 4  | –   | 4  | –   | 4  | –  | –  | –  | 1  | –   | 4  | 1  | 18    |
| 160 | <i>Populus hopeiensis</i> Hu et Chow                               | 1                    | –                               | 2  | –   | 2  | –   | 2  | –  | –  | –  | 2  | –   | 2  | 2  | 12    |
| 161 | <i>Populus jrtyschensis</i> C.Y. Yang                              | 1                    | 2                               | –  | –   | 1  | –   | 1  | –  | –  | –  | –  | –   | 1  | 1  | 6     |
| 162 | <i>Populus laurifolia</i> Ledeb.                                   | 1                    | 2                               | –  | –   | 1  | –   | 1  | –  | –  | –  | –  | –   | 1  | 1  | 6     |
| 163 | <i>Populus szechuanica</i> var. <i>tibetica</i> Schneid.           | 1                    | 2                               | –  | –   | 1  | –   | 1  | –  | –  | –  | –  | –   | 1  | 1  | 6     |
| 164 | <i>Populus tomentosa</i> Carr.                                     | 10                   | 26                              | 5  | –   | 18 | –   | 18 | –  | –  | –  | 1  | –   | 16 | 16 | 100   |
| 165 | <i>Populus ussuriensis</i> Kom.                                    | 2                    | –                               | 2  | –   | 2  | –   | 2  | –  | –  | –  | 1  | –   | 1  | 1  | 9     |
| 166 | <i>Populus wenxianica</i> Z.C. Feng et J.L. Guo ex G. Zhu          | 1                    | –                               | 2  | –   | 2  | –   | 2  | –  | –  | –  | 2  | –   | –  | –  | 8     |
| 167 | <i>Populus xiaohei</i> T.S. Hwang et Liang                         | 4                    | 10                              | –  | –   | 5  | –   | 5  | –  | –  | –  | –  | –   | 5  | 3  | 28    |
| 168 | <i>Quercus acutissima</i> Carruth.                                 | 4                    | –                               | 4  | –   | 4  | –   | 4  | –  | –  | –  | 2  | –   | 2  | 1  | 17    |
| 169 | <i>Quercus aliena</i> Bl. var. <i>acutiserrata</i> Maxim. ex Wenz. | 7                    | 14                              | 2  | –   | 9  | –   | 9  | –  | –  | –  | –  | –   | 8  | 2  | 44    |
| 170 | <i>Quercus fabrei</i> Hance                                        | 1                    | 2                               | –  | –   | 1  | –   | 1  | –  | –  | –  | –  | –   | 1  | –  | 5     |
| 171 | <i>Quercus mongolica</i> Fisch. ex Ledeb.                          | 9                    | 4                               | 9  | 8   | 8  | –   | 11 | –  | –  | –  | 2  | 2   | 7  | 3  | 54    |

| No. | Tree species (group)                                                            | Number<br>of studies | The number of biomass equations |    |     |    |     |    |    |    |    |    |     |    |    |       |
|-----|---------------------------------------------------------------------------------|----------------------|---------------------------------|----|-----|----|-----|----|----|----|----|----|-----|----|----|-------|
|     |                                                                                 |                      | SBs                             | SB | BBs | BB | LBs | LB | FF | CB | AW | AG | BGs | BG | TB | Total |
| 172 | <i>Quercus pannosa</i><br>Hand.-Mazz.                                           | 2                    | 2                               | 1  | –   | 2  | –   | 2  | –  | –  | –  | –  | 2   | 1  | –  | 10    |
| 173 | <i>Quercus senescens</i><br>Hand.-Mazz.                                         | 1                    | 2                               | –  | –   | 1  | –   | 1  | –  | –  | –  | –  | 2   | –  | –  | 6     |
| 174 | <i>Quercus variabilis</i> Bl.                                                   | 5                    | 10                              | 2  | –   | 7  | –   | 7  | –  | –  | –  | 2  | 6   | 7  | 4  | 45    |
| 175 | <i>Quercus wutaishanica</i><br>Mayr                                             | 2                    | 4                               | –  | –   | 2  | –   | 2  | –  | –  | –  | –  | –   | 2  | –  | 10    |
| 176 | <i>Rhus chinensis</i> Mill.                                                     | 1                    | –                               | 1  | –   | 1  | –   | 1  | –  | –  | –  | 1  | –   | 1  | 1  | 6     |
| 177 | <i>Rhus punjabensis</i> Stewart<br>var. <i>sinica</i> (Diels) Rehd. et<br>Wils. | 1                    | –                               | 1  | –   | 1  | –   | 1  | –  | –  | –  | 1  | –   | 1  | 1  | 6     |
| 178 | <i>Robinia pseudoacacia</i><br>Linn.                                            | 16                   | 18                              | 11 | –   | 20 | –   | 20 | 2  | –  | –  | –  | –   | 16 | 9  | 96    |
| 179 | <i>Sabina przewalskii</i> (Kom.)<br>Kom.                                        | 1                    | –                               | 1  | –   | 1  | –   | 1  | 1  | –  | –  | –  | –   | 1  | 1  | 6     |
| 180 | <i>Salix alba</i> L.                                                            | 1                    | 2                               | –  | –   | 1  | –   | 1  | –  | –  | –  | –  | –   | 1  | 1  | 6     |
| 181 | <i>Sassafras tzumu</i> (Hemsl.)<br>Hemsl.                                       | 2                    | –                               | 1  | –   | 1  | –   | 1  | –  | –  | –  | 1  | –   | 2  | –  | 6     |
| 182 | <i>Schima superba</i> Gardn. et<br>Champ.                                       | 6                    | 4                               | 4  | 4   | 4  | –   | 7  | –  | –  | 1  | 4  | –   | 4  | 2  | 34    |
| 183 | <i>Schima wallichii</i> (DC.)<br>Choisy                                         | 1                    | –                               | 1  | –   | 1  | –   | 1  | –  | –  | –  | –  | –   | –  | –  | 3     |
| 184 | <i>Sumbaviopsis albicans</i><br>(Bl.) J.J. Sm.                                  | 1                    | –                               | 1  | –   | 1  | –   | 1  | –  | –  | –  | –  | –   | 1  | 1  | 5     |
| 185 | <i>Symplocos anomala</i> Brand                                                  | 1                    | 2                               | –  | –   | 1  | –   | 1  | –  | –  | –  | –  | –   | 1  | –  | 5     |
| 186 | <i>Symplocos sumuntia</i><br>Buch.-Ham. ex D. Don                               | 1                    | 2                               | –  | –   | 1  | –   | 1  | –  | –  | –  | –  | –   | 1  | –  | 5     |
| 187 | <i>Syzygium jambos</i> (L.)<br>Alston                                           | 1                    | –                               | 1  | –   | 1  | –   | 1  | –  | –  | –  | –  | –   | 1  | –  | 4     |
| 188 | <i>Ternstroemia gymnanthera</i><br>(Wight et Arn.) Beddome                      | 1                    | –                               | 1  | –   | 1  | –   | 1  | –  | –  | –  | –  | –   | 1  | 1  | 5     |



| No. | Tree species (group)                                                    | Number<br>of studies | The number of biomass equations |     |     |      |     |      |    |    |    |     |     |     |     |       |
|-----|-------------------------------------------------------------------------|----------------------|---------------------------------|-----|-----|------|-----|------|----|----|----|-----|-----|-----|-----|-------|
|     |                                                                         |                      | SBs                             | SB  | BBs | BB   | LBs | LB   | FF | CB | AW | AG  | BGs | BG  | TB  | Total |
| 189 | <i>Tilia amurensis</i> Rupr.                                            | 7                    | –                               | 9   | 10  | 5    | –   | 9    | –  | –  | –  | 5   | 2   | 5   | 5   | 50    |
| 190 | <i>Tilia mongolica</i> Maxim.                                           | 1                    | –                               | 2   | –   | 2    | –   | 2    | –  | –  | –  | –   | –   | 2   | –   | 8     |
| 191 | <i>Trema tomentosa</i> (Roxb.)<br>Hara                                  | 1                    | –                               | 1   | –   | 1    | –   | 1    | –  | –  | –  | –   | –   | 1   | –   | 4     |
| 192 | <i>Tsoongiodendron odorum</i><br>Chun                                   | 2                    | 2                               | 2   | –   | 3    | –   | 3    | –  | –  | –  | 2   | –   | 3   | 3   | 18    |
| 193 | <i>Ulmus davidiana</i> Planch.<br>var. <i>japonica</i> (Rehd.)<br>Nakai | 4                    | –                               | 4   | 6   | 1    | –   | 4    | –  | –  | –  | 1   | –   | 1   | 1   | 18    |
| 194 | <i>Ulmus pumila</i> L.                                                  | 2                    | –                               | 2   | –   | 2    | –   | 2    | –  | –  | –  | –   | 2   | 1   | 1   | 10    |
| 195 | <i>Vernicia fordii</i> (Hemsl.)<br>Airy Shaw                            | 1                    | –                               | 2   | –   | 2    | –   | 2    | 4  | –  | –  | –   | –   | 2   | 2   | 14    |
| 196 | <i>Vernicia montana</i> Lour.                                           | 1                    | –                               | 1   | –   | 1    | –   | 1    | –  | –  | –  | –   | –   | 1   | 1   | 5     |
| 197 | <i>Zanthoxylum ailanthoides</i><br>Sieb. et Zucc.                       | 1                    | –                               | 1   | –   | 1    | –   | 1    | –  | –  | –  | –   | –   | 1   | –   | 4     |
| 198 | Mixed species                                                           | 69                   | 30                              | 75  | –   | 88   | –   | 88   | 6  | –  | –  | 21  | 22  | 73  | 33  | 436   |
|     | Total                                                                   | 906                  | 910                             | 694 | 116 | 1074 | 30  | 1116 | 43 | 26 | 3  | 364 | 246 | 837 | 465 | 5924  |

1 **Appendix E: Biomass equation forms used in studies. W is the biomass (kg); X is tree diameter (cm), tree height (m) or their**  
2 **combinations; a, b, c, and d are equation coefficients; log refers to either the natural or the 10-base logarithmic transformation of**  
3 **arithmetic values.**

| Category              | Equation form                       | Number of equations | Category    | Equation form                | Number of equations |
|-----------------------|-------------------------------------|---------------------|-------------|------------------------------|---------------------|
| Power                 | $W=a X^b$                           | 3812                | Exponential | $W=\exp(a+b X)$              | 4                   |
|                       | $W=a X^{b+c}$                       | 7                   |             | $W=\exp(a+b/X)$              | 1                   |
|                       | $W=a (b+X)^c$ (c=2, 3, 4 or 5)      | 43                  |             | $W=a \exp(b X^c)$ (c=1 or 2) | 29                  |
|                       | $W=a X^{b+c} X^d$                   | 1                   |             | $W=a \exp(b X)+c$            | 2                   |
|                       | $W=a X_1^b X_2^c$                   | 85                  |             | $W=a \exp(b+c X)$            | 1                   |
| Linear<br>/polynomial | $W=a+b X$                           | 253                 | Hyperbolic  | $W=a \exp(b/X)$              | 3                   |
|                       | $W=a+b X+c X^2$                     | 90                  |             | $W=a X^b \exp(c X)$          | 31                  |
|                       | $W=a+b X+c X^{2+d} X^3$             | 6                   |             | $W=a b^X$                    | 10                  |
|                       | $W=a+b X^c$ (c=2, 3 or 4)           | 82                  |             | $W=a b^X+c$                  | 2                   |
|                       | $W=a+b X^2+c X^4$                   | 1                   |             | $W=a \exp[b (X_1^c+X_2^d)]$  | 2                   |
| Log-linear            | $W=a+b \log(X)$                     | 16                  | Hyperbolic  | $W=X/(a+b X)$                | 17                  |
|                       | $\log(W)=a+b X$                     | 2                   |             | $W=a/(b+X)$                  | 2                   |
|                       | $\log(W)=a+b \log(X)$               | 1378                |             | $W=1/[a+b \log(X)]$          | 1                   |
|                       | $\log(W)=a+b \log(X)+c X$           | 26                  |             | $W=a b^{1/X}$                | 1                   |
|                       | $\log(W)=a+b \log(X_1)+c \log(X_2)$ | 16                  |             |                              |                     |

4
